# Supplementary material for: Genotypic and Epidemiological Trends of Acute Gastroenteritis Associated with Noroviruses in China from 2006 to 2016
Source: PubMed Central journal article supplement (PMC5707980; doi:10.3390/ijerph14111341), 2017-11-03
Supplement: ijerph-14-01341-s001.pdf [file ijerph-14-01341-s001.pdf]

# Supplementary Materials: Genotypic and Epidemiological Trends of Acute Gastroenteritis Associated with Noroviruses in China from 2006 to 2016

**Supplementary Table 1.** Accession numbers of human norovirus sequences used in this study isolated in China during 2004 to 2015 ( $n=1291$ ).

| Accession Number | Strain Name                                         | Country | Area      | Collect Year | Genotype |
|------------------|-----------------------------------------------------|---------|-----------|--------------|----------|
| KP718701.1       | Norovirus GII.17 isolate<br>Hu/15F93/ZH/GD/CHN/2015 | China   | Guangdong | 2015         | GII.17   |
| KP718700.1       | Norovirus GII.17 isolate<br>Hu/15F91/ZH/GD/CHN/2015 | China   | Guangdong | 2015         | GII.17   |
| KP718699.1       | Norovirus GII.17 isolate<br>Hu/15F89/ZH/GD/CHN/2015 | China   | Guangdong | 2015         | GII.17   |
| KP718698.1       | Norovirus GII.17 isolate<br>Hu/15F82/ZH/GD/CHN/2015 | China   | Guangdong | 2015         | GII.17   |
| KP718697.1       | Norovirus GII.17 isolate<br>Hu/15F81/ZH/GD/CHN/2015 | China   | Guangdong | 2015         | GII.17   |
| KP718696.1       | Norovirus GII.17 isolate<br>Hu/15F80/ZH/GD/CHN/2015 | China   | Guangdong | 2015         | GII.17   |
| KP718695.1       | Norovirus GII.17 isolate<br>Hu/15F79/ZH/GD/CHN/2015 | China   | Guangdong | 2015         | GII.17   |
| KP718694.1       | Norovirus GII.17 isolate<br>Hu/15F77/ZH/GD/CHN/2015 | China   | Guangdong | 2015         | GII.17   |
| KP718693.1       | Norovirus GII.17 isolate<br>Hu/15F74/ZH/GD/CHN/2015 | China   | Guangdong | 2015         | GII.17   |
| KP718692.1       | Norovirus GII.17 isolate<br>Hu/15F73/ZH/GD/CHN/2015 | China   | Guangdong | 2015         | GII.17   |
| KP718691.1       | Norovirus GII.17 isolate<br>Hu/15F72/ZH/GD/CHN/2015 | China   | Guangdong | 2015         | GII.17   |
| KP718690.1       | Norovirus GII.17 isolate<br>Hu/15F67/ZH/GD/CHN/2015 | China   | Guangdong | 2015         | GII.17   |
| KP718689.1       | Norovirus GII.17 isolate<br>Hu/15F62/ZH/GD/CHN/2015 | China   | Guangdong | 2015         | GII.17   |
| KP718688.1       | Norovirus GII.17 isolate<br>Hu/15F58/ZH/GD/CHN/2015 | China   | Guangdong | 2015         | GII.17   |
| KP718687.1       | Norovirus GII.17 isolate<br>Hu/15F57/ZH/GD/CHN/2015 | China   | Guangdong | 2015         | GII.17   |
| KP718686.1       | Norovirus GII.17 isolate<br>Hu/15F56/ZH/GD/CHN/2015 | China   | Guangdong | 2015         | GII.17   |
| KP718685.1       | Norovirus GII.17 isolate<br>Hu/15F55/ZH/GD/CHN/2015 | China   | Guangdong | 2015         | GII.17   |

Table S1. Cont.

|            |                                                       |       |           |      |        |
|------------|-------------------------------------------------------|-------|-----------|------|--------|
| KP718684.1 | Norovirus GII.17 isolate<br>Hu/15F54/ZH/GD/CHN/2015   | China | Guangdong | 2015 | GII.17 |
| KP718683.1 | Norovirus GII.17 isolate<br>Hu/15F48/ZH/GD/CHN/2015   | China | Guangdong | 2015 | GII.17 |
| KP718682.1 | Norovirus GII.17 isolate<br>Hu/15F42/ZH/GD/CHN/2015   | China | Guangdong | 2015 | GII.17 |
| KP718681.1 | Norovirus GII.17 isolate<br>Hu/15F33/ZH/GD/CHN/2015   | China | Guangdong | 2015 | GII.17 |
| KP718680.1 | Norovirus GII.17 isolate<br>Hu/15F32/ZH/GD/CHN/2015   | China | Guangdong | 2015 | GII.17 |
| KP718679.1 | Norovirus GII.17 isolate<br>Hu/15F23/HZ/GD/CHN/2015   | China | Guangdong | 2015 | GII.17 |
| KP718678.1 | Norovirus GII.17 isolate<br>Hu/15F22/HZ/GD/CHN/2015   | China | Guangdong | 2015 | GII.17 |
| KP718677.1 | Norovirus GII.17 isolate<br>Hu/15F19/HZ/GD/CHN/2015   | China | Guangdong | 2015 | GII.17 |
| KP718676.1 | Norovirus GII.17 isolate<br>Hu/15F18/HZ/GD/CHN/2015   | China | Guangdong | 2015 | GII.17 |
| KP718669.1 | Norovirus GII.17 isolate<br>Hu/14F1665/DG/GD/CHN/2014 | China | Guangdong | 2014 | GII.17 |
| KP718668.1 | Norovirus GII.17 isolate<br>Hu/14F1651/QY/GD/CHN/2014 | China | Guangdong | 2014 | GII.17 |
| KP718667.1 | Norovirus GII.17 isolate<br>Hu/14F1650/QY/GD/CHN/2014 | China | Guangdong | 2014 | GII.17 |
| KP718666.1 | Norovirus GII.17 isolate<br>Hu/14F1649/QY/GD/CHN/2014 | China | Guangdong | 2014 | GII.17 |
| KP718665.1 | Norovirus GII.17 isolate<br>Hu/14F1648/QY/GD/CHN/2014 | China | Guangdong | 2014 | GII.17 |
| KP718664.1 | Norovirus GII.17 isolate<br>Hu/14F1646/QY/GD/CHN/2014 | China | Guangdong | 2014 | GII.17 |
| KP718663.1 | Norovirus GII.17 isolate<br>Hu/14F1645/QY/GD/CHN/2014 | China | Guangdong | 2014 | GII.17 |
| KP718662.1 | Norovirus GII.17 isolate<br>Hu/14F1539/SZ/GD/CHN/2014 | China | Guangdong | 2014 | GII.17 |
| KP718661.1 | Norovirus GII.17 isolate<br>Hu/14F1538/SZ/GD/CHN/2014 | China | Guangdong | 2014 | GII.17 |
| KP718660.1 | Norovirus GII.17 isolate<br>Hu/14F1537/SZ/GD/CHN/2014 | China | Guangdong | 2014 | GII.17 |
| KP718659.1 | Norovirus GII.17 isolate<br>Hu/14F1536/SZ/GD/CHN/2014 | China | Guangdong | 2014 | GII.17 |
| KP718658.1 | Norovirus GII.17 isolate<br>Hu/14F1535/SZ/GD/CHN/2014 | China | Guangdong | 2014 | GII.17 |
| KP718657.1 | Norovirus GII.17 isolate<br>Hu/14F1534/SZ/GD/CHN/2014 | China | Guangdong | 2014 | GII.17 |
| KP718656.1 | Norovirus GII.17 isolate<br>Hu/14F1533/SZ/GD/CHN/2014 | China | Guangdong | 2014 | GII.17 |

Table S1. Cont.

|            |                                                                       |       |           |      |        |
|------------|-----------------------------------------------------------------------|-------|-----------|------|--------|
| KP718655.1 | Norovirus GII.17 isolate<br>Hu/14F1532/SZ/GD/CHN/2014                 | China | Guangdong | 2014 | GII.17 |
| KP718654.1 | Norovirus GII.17 isolate<br>Hu/14F1531/SZ/GD/CHN/2014                 | China | Guangdong | 2014 | GII.17 |
| KP718653.1 | Norovirus GII.17 isolate<br>Hu/14F1530/SZ/GD/CHN/2014                 | China | Guangdong | 2014 | GII.17 |
| KP718652.1 | Norovirus GII.17 isolate<br>Hu/14F1529/SZ/GD/CHN/2014                 | China | Guangdong | 2014 | GII.17 |
| KP718651.1 | Norovirus GII.17 isolate<br>Hu/14F1528/SZ/GD/CHN/2014                 | China | Guangdong | 2014 | GII.17 |
| KP718650.1 | Norovirus GII.17 isolate<br>Hu/14F1527/SZ/GD/CHN/2014                 | China | Guangdong | 2014 | GII.17 |
| KP718649.1 | Norovirus GII.17 isolate<br>Hu/14F1526/SZ/GD/CHN/2014                 | China | Guangdong | 2014 | GII.17 |
| KP718648.1 | Norovirus GII.17 isolate<br>Hu/14F1523/SZ/GD/CHN/2014                 | China | Guangdong | 2014 | GII.17 |
| KP718647.1 | Norovirus GII.17 isolate<br>Hu/14F1521/SZ/GD/CHN/2014                 | China | Guangdong | 2014 | GII.17 |
| KP718646.1 | Norovirus GII.17 isolate<br>Hu/14F1520/SZ/GD/CHN/2014                 | China | Guangdong | 2014 | GII.17 |
| KP718645.1 | Norovirus GII.17 isolate<br>Hu/14F1516/JM/GD/CHN/2014                 | China | Guangdong | 2014 | GII.17 |
| KP718644.1 | Norovirus GII.17 isolate<br>Hu/14F1515/JM/GD/CHN/2014                 | China | Guangdong | 2014 | GII.17 |
| KP718643.1 | Norovirus GII.17 isolate<br>Hu/14F1514/JM/GD/CHN/2014                 | China | Guangdong | 2014 | GII.17 |
| KP718642.1 | Norovirus GII.17 isolate<br>Hu/14F1513/JM/GD/CHN/2014                 | China | Guangdong | 2014 | GII.17 |
| KP718641.1 | Norovirus GII.17 isolate<br>Hu/14F1512/JM/GD/CHN/2014                 | China | Guangdong | 2014 | GII.17 |
| KP718640.1 | Norovirus GII.17 isolate<br>Hu/14F1505/GZ/GD/CHN/2014                 | China | Guangdong | 2014 | GII.17 |
| KP718639.1 | Norovirus GII.17 isolate<br>Hu/14F1503/GZ/GD/CHN/2014                 | China | Guangdong | 2014 | GII.17 |
| KP718638.1 | Norovirus GII.17 isolate<br>Hu/14F1502/GZ/GD/CHN/2014                 | China | Guangdong | 2014 | GII.17 |
| KJ938997.1 | Norovirus<br>Hu/GI.3/Xiangyang43/Hubei/2013/CHN isolate Xiangyang43   | China | Hubei     | 2013 | GI.3   |
| KJ938996.1 | Norovirus<br>Hu/GII.4/Xiangyang53/Hubei/2013/CHN isolate Xiangyang53  | China | Hubei     | 2013 | GII.4  |
| KJ938995.1 | Norovirus<br>Hu/GII.12/Xiangyang27/Hubei/2013/CHN isolate Xiangyang27 | China | Hubei     | 2013 | GII.12 |

Table S1. Cont.

|            |                                                           |       |       |      |        |
|------------|-----------------------------------------------------------|-------|-------|------|--------|
|            | Norovirus                                                 |       |       |      |        |
| KJ938994.1 | Hu/GII.12/Xiangyang21/Hubei/2013/CHN isolate Xiangyang21  | China | Hubei | 2013 | GII.12 |
|            | Norovirus                                                 |       |       |      |        |
| KJ938993.1 | Hu/GII.6/Xiangyang09/Hubei/2013/CHN isolate Xiangyang09   | China | Hubei | 2013 | GII.6  |
|            | Norovirus                                                 |       |       |      |        |
| KJ938992.1 | Hu/GII.3/Xiangyang08/Hubei/2013/CHN isolate Xiangyang08   | China | Hubei | 2013 | GII.3  |
|            | Norovirus                                                 |       |       |      |        |
| KJ938991.1 | Hu/GII.3/Xiangyang11/Hubei/2013/CHN isolate Xiangyang11   | China | Hubei | 2013 | GII.3  |
|            | Norovirus                                                 |       |       |      |        |
| KJ938990.1 | Hu/GII.3/Xiangyang07/Hubei/2013/CHN isolate Xiangyang07   | China | Hubei | 2013 | GII.3  |
|            | Norovirus                                                 |       |       |      |        |
| KJ938989.1 | GII.4/Xiangyang05/Hubei/2013/CHN isolate Xiangyang05      | China | Hubei | 2013 | GII.4  |
|            | Norovirus                                                 |       |       |      |        |
| KJ938988.1 | Hu/GII.3/Xiangyang04/Hubei/2013/CHN isolate Xiangyang04   | China | Hubei | 2013 | GII.3  |
|            | Norovirus                                                 |       |       |      |        |
| KJ938987.1 | Hu/GII.4/Xiangyang02/Hubei/2013/CHN isolate Xiangyang02   | China | Hubei | 2013 | GII.4  |
|            | Norovirus                                                 |       |       |      |        |
| KJ938986.1 | Hu/GII.12/Xiangyang01/Hubei/2013/CHN isolate Xiangyang01  | China | Hubei | 2013 | GII.12 |
|            | Norovirus                                                 |       |       |      |        |
| KJ938985.1 | Hu/GII.3/Xiangyang108/Hubei/2013/CHN isolate Xiangyang108 | China | Hubei | 2013 | GII.3  |
| KJ938984.1 | Hu/GII.4/Xiangyang97/Hubei/2013/CHN isolate Xiangyang97   | China | Hubei | 2013 | GII.4  |
| KJ938983.1 | Hu/GII.4/Xiangyang93/Hubei/2013/CHN isolate Xiangyang93   | China | Hubei | 2013 | GII.4  |
| KJ938982.1 | Hu/GII.6/Xiangyang88/Hubei/2013/CHN isolate Xiangyang88   | China | Hubei | 2013 | GII.6  |
| KJ938981.1 | Hu/GII.4/Xiangyang86/Hubei/2013/CHN isolate Xiangyang86   | China | Hubei | 2013 | GII.4  |
| KJ938980.1 | Hu/GII.3/Xiangyang84/Hubei/2013/CHN isolate Xiangyang84   | China | Hubei | 2013 | GII.3  |
| KJ938979.1 | Hu/GII.4/Xiangyang76/Hubei/2013/CHN isolate Xiangyang76   | China | Hubei | 2013 | GII.4  |
| KJ938978.1 | Hu/GII.4/Xiangyang74/Hubei/2013/CHN isolate Xiangyang74   | China | Hubei | 2013 | GII.4  |

Table S1. Cont.

| Norovirus                                               |                                                          |       |           |      |            |
|---------------------------------------------------------|----------------------------------------------------------|-------|-----------|------|------------|
| KJ938977.1                                              | Hu/GII.12/Xiangyang73/Hubei/2013/CHN isolate Xiangyang73 | China | Hubei     | 2013 | GII.12     |
| KJ938976.1                                              | Hu/GII.4/Xiangyang71/Hubei/2013/CHN                      | China | Hubei     | 2013 | GII.4      |
| KJ938975.1                                              | Hu/GII.4/Xiangyang60/Hubei/2013/CHN                      | China | Hubei     | 2013 | GII.4      |
| KJ938974.1                                              | Hu/GII.6/Xiangyang32/Hubei/2013/CHN                      | China | Hubei     | 2013 | GII.6      |
| KJ938973.1                                              | Hu/GII.4/Xiangyang13/Hubei/2013/CHN                      | China | Hubei     | 2013 | GII.4      |
| KJ938972.1                                              | Hu/GII.4/Xiangyang12/Hubei/2013/CHN                      | China | Hubei     | 2013 | GII.4      |
| Norovirus                                               |                                                          |       |           |      |            |
| KC456073.1                                              | Hu/GII.4/VP1451/Shanghai/2012/CHN                        | China | Shanghai  | 2012 | GII.4      |
| Norovirus                                               |                                                          |       |           |      |            |
| KC456072.1                                              | Hu/GII.4/VP1281/Shanghai/2012/CHN                        | China | Shanghai  | 2012 | GII.4      |
| Norovirus                                               |                                                          |       |           |      |            |
| KC456071.1                                              | Hu/GII.4/VP1214/Shanghai/2012/CHN                        | China | Shanghai  | 2012 | GII.4      |
| Norovirus                                               |                                                          |       |           |      |            |
| KC456070.1                                              | Hu/GII.4/VP1172/Shanghai/2012/CHN                        | China | Shanghai  | 2012 | GII.4      |
| Norovirus GI strain                                     |                                                          |       |           |      |            |
| KP407450.1                                              | Hu/CHN/2008/GI.P8_GI.8/Huzhou/N10                        | China | Zhejiang  | 2008 | GI.P8_GI.8 |
| Norovirus GI strain                                     |                                                          |       |           |      |            |
| KP407451.1                                              | GI/Hu/CHN/2008/Huzhou/N11                                | China | Zhejiang  | 2008 | GI         |
| Norovirus GII.17 isolate                                |                                                          |       |           |      |            |
| KP998539.1                                              | GII/Hu/HKG/2014/GII.17/CUHK-NS-463                       | China | Hong Kong | 2014 | GII.17     |
| Norovirus                                               |                                                          |       |           |      |            |
| KR020503.1                                              | Hu/GII.17/41621/Guangzhou/2014/CHN                       | China | Guangdong | 2014 | GII.17     |
| Norovirus GII.17 isolate                                |                                                          |       |           |      |            |
| KP994318.1                                              | Hu/NoV/GD1697/2014/Guangdong/China                       | China | Guangdong | 2014 | GII.17     |
| Norovirus Hu/GII.4/Beijing isolate PKUPH-63/Outpatient  |                                                          |       |           |      |            |
| KJ716369.1                                              |                                                          | China | Beijing   | 2012 | GII.4      |
| Norovirus Hu/GII.4/Beijing isolate PKUPH-160/Outpatient |                                                          |       |           |      |            |
| KJ716368.1                                              |                                                          | China | Beijing   | 2013 | GII.4      |
| Norovirus Hu/GII.4/Beijing isolate PKUPH-159/Outpatient |                                                          |       |           |      |            |
| KJ716367.1                                              |                                                          | China | Beijing   | 2013 | GII.4      |

Table S1. Cont.

|            |                                                           |       |         |      |       |
|------------|-----------------------------------------------------------|-------|---------|------|-------|
| KJ716366.1 | Norovirus Hu/GII.4/Beijing isolate PKUPH-140/Outpatient   | China | Beijing | 2013 | GII.4 |
| KJ716365.1 | Norovirus Hu/GII.4/Beijing isolate PKUPH-129/Outpatient   | China | Beijing | 2013 | GII.4 |
| KJ716364.1 | Norovirus Hu/GII.4/Beijing isolate PKUPH-124/Outpatient   | China | Beijing | 2013 | GII.4 |
| KJ716363.1 | Norovirus Hu/GII.4/Beijing isolate PKUPH-118/Outpatient   | China | Beijing | 2013 | GII.4 |
| KJ716362.1 | Norovirus Hu/GII.4/Beijing isolate PKUPH-117/Outpatient   | China | Beijing | 2013 | GII.4 |
| KJ716361.1 | Norovirus Hu/GII.4/Beijing isolate PKUPH-97/Outpatient    | China | Beijing | 2012 | GII.4 |
| KJ716360.1 | Norovirus Hu/GII.4/Beijing isolate PKUPH-78/Outpatient    | China | Beijing | 2012 | GII.4 |
| KJ716359.1 | Norovirus Hu/GII.4/Beijing isolate PKUPH-64/Outpatient    | China | Beijing | 2012 | GII.4 |
| KJ716358.1 | Norovirus Hu/GII.4/Beijing isolate PKUPH-40/Outpatient    | China | Beijing | 2012 | GII.4 |
| KJ716357.1 | Norovirus Hu/GII.4/Beijing isolate PKUPH-39/Outpatient    | China | Beijing | 2012 | GII.4 |
| KJ716356.1 | Norovirus Hu/GII.4/Beijing isolate PKUPH-37/Outpatient    | China | Beijing | 2012 | GII.4 |
| KJ716355.1 | Norovirus Hu/GII.4/Beijing isolate PKUPH-20/Outpatient    | China | Beijing | 2012 | GII.4 |
| KJ716354.1 | Norovirus Hu/GII.4/Beijing isolate PKUPH-19/Outpatient    | China | Beijing | 2012 | GII.4 |
| KJ678154.1 | Norovirus Hu/GII.4/Beijing/PKUPH-07-05/inpatient/2013/CHN | China | Beijing | 2013 | GII.4 |
| KJ678153.1 | Norovirus Hu/GII.4/Beijing/PKUPH-07-04/inpatient/2013/CHN | China | Beijing | 2013 | GII.4 |
| KJ678152.1 | Norovirus Hu/GII.4/Beijing/PKUPH-07-03/inpatient/2013/CHN | China | Beijing | 2013 | GII.4 |
| KJ678151.1 | Norovirus Hu/GII.4/Beijing/PKUPH-07-02/inpatient/2013/CHN | China | Beijing | 2013 | GII.4 |
| KJ678150.1 | Norovirus Hu/GII.4/Beijing/PKUPH-07-01/inpatient/2013/CHN | China | Beijing | 2013 | GII.4 |
| KJ678149.1 | Norovirus Hu/GII.4/Beijing/PKUPH-05-07/inpatient/2013/CHN | China | Beijing | 2013 | GII.4 |

Table S1. Cont.

|            |                                                 |       |         |      |       |
|------------|-------------------------------------------------|-------|---------|------|-------|
|            | Norovirus                                       |       |         |      |       |
| KJ678148.1 | Hu/GII.4/Beijing/PKUPH-05-06/inpatient/2013/CHN | China | Beijing | 2013 | GII.4 |
|            | Norovirus                                       |       |         |      |       |
| KJ678147.1 | Hu/GII.4/Beijing/PKUPH-05-05/inpatient/2013/CHN | China | Beijing | 2013 | GII.4 |
|            | Norovirus                                       |       |         |      |       |
| KJ678146.1 | Hu/GII.4/Beijing/PKUPH-05-04/inpatient/2013/CHN | China | Beijing | 2013 | GII.4 |
|            | Norovirus                                       |       |         |      |       |
| KJ678145.1 | Hu/GII.4/Beijing/PKUPH-05-03/inpatient/2013/CHN | China | Beijing | 2013 | GII.4 |
|            | Norovirus                                       |       |         |      |       |
| KJ678144.1 | Hu/GII.4/Beijing/PKUPH-05-02/inpatient/2013/CHN | China | Beijing | 2013 | GII.4 |
|            | Norovirus                                       |       |         |      |       |
| KJ678143.1 | Hu/GII.4/Beijing/PKUPH-05-01/inpatient/2013/CHN | China | Beijing | 2013 | GII.4 |
|            | Norovirus                                       |       |         |      |       |
| KJ678142.1 | Hu/GII.4/Beijing/PKUPH-02-09/inpatient/2013/CHN | China | Beijing | 2013 | GII.4 |
|            | Norovirus                                       |       |         |      |       |
| KJ678141.1 | Hu/GII.4/Beijing/PKUPH-02-08/inpatient/2013/CHN | China | Beijing | 2013 | GII.4 |
|            | Norovirus                                       |       |         |      |       |
| KJ678140.1 | Hu/GII.4/Beijing/PKUPH-02-07/inpatient/2013/CHN | China | Beijing | 2013 | GII.4 |
|            | Norovirus                                       |       |         |      |       |
| KJ678139.1 | Hu/GII.4/Beijing/PKUPH-02-06/inpatient/2013/CHN | China | Beijing | 2013 | GII.4 |
|            | Norovirus                                       |       |         |      |       |
| KJ678138.1 | Hu/GII.4/Beijing/PKUPH-02-05/inpatient/2013/CHN | China | Beijing | 2013 | GII.4 |
|            | Norovirus                                       |       |         |      |       |
| KJ678137.1 | Hu/GII.4/Beijing/PKUPH-02-04/inpatient/2013/CHN | China | Beijing | 2013 | GII.4 |
|            | Norovirus                                       |       |         |      |       |
| KJ678136.1 | Hu/GII.4/Beijing/PKUPH-02-03/inpatient/2012/CHN | China | Beijing | 2012 | GII.4 |
|            | Norovirus                                       |       |         |      |       |
| KJ678135.1 | Hu/GII.4/Beijing/PKUPH-02-02/inpatient/2012/CHN | China | Beijing | 2012 | GII.4 |
|            | Norovirus                                       |       |         |      |       |
| KJ678134.1 | Hu/GII.4/Beijing/PKUPH-02-01/inpatient/2012/CHN | China | Beijing | 2012 | GII.4 |

Table S1. Cont.

|            |                                           |       |         |      |       |
|------------|-------------------------------------------|-------|---------|------|-------|
| KJ465092.1 | Norovirus<br>Hu/GII.4/13R21/2013/CHN      | China | Beijing | 2013 | GII.4 |
| KJ465091.1 | Norovirus Hu/GII.4/XW-<br>YJH/2011/CHN    | China | Beijing | 2011 | GII.4 |
| KJ465090.1 | Norovirus Hu/GII.4/XW-<br>SYT/2011/CHN    | China | Beijing | 2011 | GII.4 |
| KJ465089.1 | Norovirus Hu/GII.4/XW-<br>MLX/2011/CHN    | China | Beijing | 2011 | GII.4 |
| KJ465088.1 | Norovirus<br>Hu/GII.4/S6/2012/CHN         | China | Beijing | 2012 | GII.4 |
| KJ465087.1 | Norovirus<br>Hu/GII.4/R3/2013/CHN         | China | Beijing | 2013 | GII.4 |
| KJ465086.1 | Norovirus<br>Hu/GII.4/PGZT/2011/CHN       | China | Beijing | 2011 | GII.4 |
| KJ465085.1 | Norovirus<br>Hu/GII.4/PGWFZ/2011/CHN      | China | Beijing | 2011 | GII.4 |
| KJ465084.1 | Norovirus<br>Hu/GII.4/HR99/2012/CHN       | China | Beijing | 2012 | GII.4 |
| KJ465083.1 | Norovirus<br>Hu/GII.4/HR96/2012/CHN       | China | Beijing | 2012 | GII.4 |
| KJ465082.1 | Norovirus Hu/GII.4/HD-<br>ZLY/2011/CHN    | China | Beijing | 2011 | GII.4 |
| KJ465081.1 | Norovirus Hu/GII.4/HD-<br>TYM/2011/CHN    | China | Beijing | 2011 | GII.4 |
| KJ465080.1 | Norovirus Hu/GII.4/HD-<br>LWX/2011/CHN    | China | Beijing | 2011 | GII.4 |
| KJ465079.1 | Norovirus Hu/GII.4/FT-<br>SCS/2011/CHN    | China | Beijing | 2011 | GII.4 |
| KJ465078.1 | Norovirus Hu/GII.4/DX1301-<br>14/2013/CHN | China | Beijing | 2013 | GII.4 |
| KJ465077.1 | Norovirus Hu/GII.4/DX12-<br>4/2013/CHN    | China | Beijing | 2013 | GII.4 |
| KJ465076.1 | Norovirus Hu/GII.4/DX10-<br>9/2012/CHN    | China | Beijing | 2012 | GII.4 |
| KJ465075.1 | Norovirus Hu/GII.4/DX10-<br>10/2012/CHN   | China | Beijing | 2012 | GII.4 |
| KJ465074.1 | Norovirus<br>Hu/GII.4/CYWC/2012/CHN       | China | Beijing | 2012 | GII.4 |
| KJ465072.1 | Norovirus<br>Hu/GII.4/CWWBT/2012/CHN      | China | Beijing | 2012 | GII.4 |
| KJ465071.1 | Norovirus<br>Hu/GII.4/CWSDH/2012/CHN      | China | Beijing | 2012 | GII.4 |
| KJ465070.1 | Norovirus<br>Hu/GII.4/CWRS/2012/CHN       | China | Beijing | 2012 | GII.4 |
| KJ465069.1 | Norovirus<br>Hu/GII.4/CWLMH/2012/CHN      | China | Beijing | 2012 | GII.4 |



Table S1. Cont.

|            |                                         |       |         |      |       |
|------------|-----------------------------------------|-------|---------|------|-------|
| KJ465068.1 | Norovirus<br>Hu/GII.4/CWLGC/2012/CHN    | China | Beijing | 2012 | GII.4 |
| KJ465067.1 | Norovirus<br>Hu/GII.4/cw7/2012/CHN      | China | Beijing | 2012 | GII.4 |
| KJ465066.1 | Norovirus<br>Hu/GII.4/cw5/2012/CHN      | China | Beijing | 2012 | GII.4 |
| KJ465065.1 | Norovirus Hu/GII.4/CW-<br>ZYYX/2011/CHN | China | Beijing | 2011 | GII.4 |
| KJ465064.1 | Norovirus Hu/GII.4/CW-<br>WYL/2011/CHN  | China | Beijing | 2011 | GII.4 |
| KJ465063.1 | Norovirus Hu/GII.4/CW-<br>WH/2011/CHN   | China | Beijing | 2011 | GII.4 |
| KJ465062.1 | Norovirus<br>Hu/GII.4/CLX/2012/CHN      | China | Beijing | 2012 | GII.4 |
| KJ465061.1 | Norovirus<br>Hu/GII.4/13LGX/2013/CHN    | China | Beijing | 2013 | GII.4 |
| KJ465060.1 | Norovirus<br>Hu/GII.4/13291009/2013/CHN | China | Beijing | 2013 | GII.4 |
| KJ465059.1 | Norovirus<br>Hu/GII.4/13281011/2013/CHN | China | Beijing | 2013 | GII.4 |
| KJ465058.1 | Norovirus<br>Hu/GII.4/13281007/2013/CHN | China | Beijing | 2013 | GII.4 |
| KJ465057.1 | Norovirus<br>Hu/GII.4/13141022/2013/CHN | China | Beijing | 2013 | GII.4 |
| KJ465056.1 | Norovirus<br>Hu/GII.4/13141015/2013/CHN | China | Beijing | 2013 | GII.4 |
| KJ465055.1 | Norovirus<br>Hu/GII.4/13141013/2013/CHN | China | Beijing | 2013 | GII.4 |
| KJ465054.1 | Norovirus<br>Hu/GII.4/13112018/2013/CHN | China | Beijing | 2013 | GII.4 |
| KJ465053.1 | Norovirus<br>Hu/GII.4/13091002/2013/CHN | China | Beijing | 2013 | GII.4 |
| KJ465052.1 | Norovirus<br>Hu/GII.4/13071236/2013/CHN | China | Beijing | 2013 | GII.4 |
| KJ465051.1 | Norovirus<br>Hu/GII.4/13061031/2013/CHN | China | Beijing | 2013 | GII.4 |
| KJ465050.1 | Norovirus<br>Hu/GII.4/13061022/2013/CHN | China | Beijing | 2013 | GII.4 |
| KJ465049.1 | Norovirus<br>Hu/GII.4/13041020/2013/CHN | China | Beijing | 2013 | GII.4 |
| KJ465048.1 | Norovirus<br>Hu/GII.4/13011024/2013/CHN | China | Beijing | 2013 | GII.4 |
| KJ465047.1 | Norovirus<br>Hu/GII.4/13011017/2013/CHN | China | Beijing | 2013 | GII.4 |
| KJ465046.1 | Norovirus<br>Hu/GII.4/13011004/2013/CHN | China | Beijing | 2013 | GII.4 |

Table S1. Cont.

|            |                                           |       |         |      |       |
|------------|-------------------------------------------|-------|---------|------|-------|
| KJ465045.1 | Norovirus<br>Hu/GII.4/12R8/2012/CHN       | China | Beijing | 2012 | GII.4 |
| KJ465044.1 | Norovirus<br>Hu/GII.4/12R6/2012/CHN       | China | Beijing | 2012 | GII.4 |
| KJ465043.1 | Norovirus<br>Hu/GII.4/12281114/2012/CHN   | China | Beijing | 2012 | GII.4 |
| KJ465042.1 | Norovirus<br>Hu/GII.4/12281109/2012/CHN   | China | Beijing | 2012 | GII.4 |
| KJ465041.1 | Norovirus<br>Hu/GII.4/12281094/2012/CHN   | China | Beijing | 2012 | GII.4 |
| KJ465040.1 | Norovirus<br>Hu/GII.4/12281003/2012/CHN   | China | Beijing | 2012 | GII.4 |
| KJ465039.1 | Norovirus<br>Hu/GII.4/12142035/2012/CHN   | China | Beijing | 2012 | GII.4 |
| KJ465038.1 | Norovirus<br>Hu/GII.4/12142032/2012/CHN   | China | Beijing | 2012 | GII.4 |
| KJ465037.1 | Norovirus<br>Hu/GII.4/12141070/2012/CHN   | China | Beijing | 2012 | GII.4 |
| KJ465036.1 | Norovirus<br>Hu/GII.4/12131112/2012/CHN   | China | Beijing | 2012 | GII.4 |
| KJ465035.1 | Norovirus<br>Hu/GII.4/12131110/2012/CHN   | China | Beijing | 2012 | GII.4 |
| KJ465034.1 | Norovirus<br>Hu/GII.4/12112113/2012/CHN   | China | Beijing | 2012 | GII.4 |
| KJ465033.1 | Norovirus<br>Hu/GII.4/12112093/2012/CHN   | China | Beijing | 2012 | GII.4 |
| KJ465032.1 | Norovirus<br>Hu/GII.4/12092053/2012/CHN   | China | Beijing | 2012 | GII.4 |
| KJ465031.1 | Norovirus<br>Hu/GII.4/12091051/2012/CHN   | China | Beijing | 2012 | GII.4 |
| KJ465030.1 | Norovirus<br>Hu/GII.4/12081098/2012/CHN   | China | Beijing | 2012 | GII.4 |
| KJ465029.1 | Norovirus<br>Hu/GII.4/12081093/2012/CHN   | China | Beijing | 2012 | GII.4 |
| KJ465028.1 | Norovirus Hu/GII.4/12078FY-<br>1/2012/CHN | China | Beijing | 2012 | GII.4 |
| KJ465027.1 | Norovirus<br>Hu/GII.4/12071234/2012/CHN   | China | Beijing | 2012 | GII.4 |
| KJ465026.1 | Norovirus<br>Hu/GII.4/12061119/2012/CHN   | China | Beijing | 2012 | GII.4 |
| KJ465025.1 | Norovirus<br>Hu/GII.4/12041121/2012/CHN   | China | Beijing | 2012 | GII.4 |
| KJ465024.1 | Norovirus<br>Hu/GII.4/12041104/2012/CHN   | China | Beijing | 2012 | GII.4 |
| KJ465023.1 | Norovirus<br>Hu/GII.4/12041095/2012/CHN   | China | Beijing | 2012 | GII.4 |

Table S1. Cont.

|            |                                         |       |         |      |       |
|------------|-----------------------------------------|-------|---------|------|-------|
| KJ465022.1 | Norovirus<br>Hu/GII.4/12041058/2012/CHN | China | Beijing | 2012 | GII.4 |
| KJ465021.1 | Norovirus<br>Hu/GII.4/12012091/2012/CHN | China | Beijing | 2012 | GII.4 |
| KJ465020.1 | Norovirus<br>Hu/GII.4/12012059/2012/CHN | China | Beijing | 2012 | GII.4 |
| KJ465019.1 | Norovirus<br>Hu/GII.4/12011114/2012/CHN | China | Beijing | 2012 | GII.4 |
| KJ465018.1 | Norovirus<br>Hu/GII.4/12011106/2012/CHN | China | Beijing | 2012 | GII.4 |
| KJ465017.1 | Norovirus<br>Hu/GII.4/11281119/2011/CHN | China | Beijing | 2011 | GII.4 |
| KJ465016.1 | Norovirus<br>Hu/GII.4/11281117/2011/CHN | China | Beijing | 2011 | GII.4 |
| KJ465015.1 | Norovirus<br>Hu/GII.4/11142034/2011/CHN | China | Beijing | 2011 | GII.4 |
| KJ465014.1 | Norovirus<br>Hu/GII.4/11142019/2011/CHN | China | Beijing | 2011 | GII.4 |
| KJ465013.1 | Norovirus<br>Hu/GII.4/11141035/2011/CHN | China | Beijing | 2011 | GII.4 |
| KJ465012.1 | Norovirus<br>Hu/GII.4/11092055/2011/CHN | China | Beijing | 2011 | GII.4 |
| KJ465011.1 | Norovirus<br>Hu/GII.4/11092052/2011/CHN | China | Beijing | 2011 | GII.4 |
| KJ465010.1 | Norovirus<br>Hu/GII.4/11092045/2011/CHN | China | Beijing | 2011 | GII.4 |
| KJ465009.1 | Norovirus<br>Hu/GII.4/11092042/2011/CHN | China | Beijing | 2011 | GII.4 |
| KJ465008.1 | Norovirus<br>Hu/GII.4/11091037/2011/CHN | China | Beijing | 2011 | GII.4 |
| KJ465007.1 | Norovirus<br>Hu/GII.4/11091034/2011/CHN | China | Beijing | 2011 | GII.4 |
| KJ465006.1 | Norovirus<br>Hu/GII.4/11091017/2011/CHN | China | Beijing | 2011 | GII.4 |
| KJ465005.1 | Norovirus<br>Hu/GII.4/11071223/2012/CHN | China | Beijing | 2012 | GII.4 |
| KJ465004.1 | Norovirus<br>Hu/GII.4/11071219/2012/CHN | China | Beijing | 2012 | GII.4 |
| KJ465003.1 | Norovirus<br>Hu/GII.4/11071217/2012/CHN | China | Beijing | 2012 | GII.4 |
| KJ465002.1 | Norovirus<br>Hu/GII.4/11071215/2012/CHN | China | Beijing | 2012 | GII.4 |
| KJ465001.1 | Norovirus<br>Hu/GII.4/11011095/2011/CHN | China | Beijing | 2011 | GII.4 |
| KJ465000.1 | Norovirus<br>Hu/GII.4/11011090/2011/CHN | China | Beijing | 2011 | GII.4 |

Table S1. Cont.

|            |                                                  |       |          |      |       |
|------------|--------------------------------------------------|-------|----------|------|-------|
| KJ464999.1 | Norovirus<br>Hu/GII.4/11011082/2011/CHN          | China | Beijing  | 2011 | GII.4 |
| KJ464998.1 | Norovirus<br>Hu/GII.4/11011081/2011/CHN          | China | Beijing  | 2011 | GII.4 |
| KJ464997.1 | Norovirus<br>Hu/GII.4/11011075/2011/CHN          | China | Beijing  | 2011 | GII.4 |
| KR107934.1 | Norovirus GI.2 isolate<br>sewage/SD7506/2013/CHN | China | Shandong | 2013 | GI.2  |
| KR107933.1 | Norovirus GI.2 isolate<br>sewage/SD7503/2013/CHN | China | Shandong | 2013 | GI.2  |
| KR107932.1 | Norovirus GI.2 isolate<br>sewage/SD7107/2013/CHN | China | Shandong | 2013 | GI.2  |
| KR107931.1 | Norovirus GI.2 isolate<br>sewage/SD6901/2013/CHN | China | Shandong | 2013 | GI.2  |
| KR107930.1 | Norovirus GI.2 isolate<br>sewage/SD6807/2013/CHN | China | Shandong | 2013 | GI.2  |
| KR107929.1 | Norovirus GI.9 isolate<br>sewage/SD7201/2013/CHN | China | Shandong | 2013 | GI.9  |
| KR107928.1 | Norovirus GI.8 isolate<br>sewage/SD1408/2013/CHN | China | Shandong | 2013 | GI.8  |
| KR107927.1 | Norovirus GI.8 isolate<br>sewage/SD1406/2013/CHN | China | Shandong | 2013 | GI.8  |
| KR107926.1 | Norovirus GI.8 isolate<br>sewage/SD1309/2013/CHN | China | Shandong | 2013 | GI.8  |
| KR107925.1 | Norovirus GI.8 isolate<br>sewage/SD7208/2013/CHN | China | Shandong | 2013 | GI.8  |
| KR107924.1 | Norovirus GI.8 isolate<br>sewage/SD6704/2013/CHN | China | Shandong | 2013 | GI.8  |
| KR107923.1 | Norovirus GI.8 isolate<br>sewage/SD6603/2013/CHN | China | Shandong | 2013 | GI.8  |
| KR107922.1 | Norovirus GI.6 isolate<br>sewage/SD1508/2013/CHN | China | Shandong | 2013 | GI.6  |
| KR107921.1 | Norovirus GI.6 isolate<br>sewage/SD0210/2013/CHN | China | Shandong | 2013 | GI.6  |
| KR107920.1 | Norovirus GI.6 isolate<br>sewage/SD6710/2013/CHN | China | Shandong | 2013 | GI.6  |
| KR107919.1 | Norovirus GI.6 isolate<br>sewage/SD7507/2013/CHN | China | Shandong | 2013 | GI.6  |
| KR107918.1 | Norovirus GI.5 isolate<br>sewage/SD0108/2013/CHN | China | Shandong | 2013 | GI.5  |
| KR107917.1 | Norovirus GI.5 isolate<br>sewage/SD0103/2013/CHN | China | Shandong | 2013 | GI.5  |
| KR107916.1 | Norovirus GI.5 isolate<br>sewage/SD6808/2013/CHN | China | Shandong | 2013 | GI.5  |
| KR107915.1 | Norovirus GI.5 isolate<br>sewage/SD7608/2013/CHN | China | Shandong | 2013 | GI.5  |

Table S1. Cont.

|            |                                                  |       |          |      |      |
|------------|--------------------------------------------------|-------|----------|------|------|
| KR107914.1 | Norovirus GI.5 isolate<br>sewage/SD7604/2013/CHN | China | Shandong | 2013 | GI.5 |
| KR107913.1 | Norovirus GI.5 isolate<br>sewage/SD7510/2013/CHN | China | Shandong | 2013 | GI.5 |
| KR107912.1 | Norovirus GI.5 isolate<br>sewage/SD7505/2013/CHN | China | Shandong | 2013 | GI.5 |
| KR107911.1 | Norovirus GI.5 isolate<br>sewage/SD7504/2013/CHN | China | Shandong | 2013 | GI.5 |
| KR107910.1 | Norovirus GI.5 isolate<br>sewage/SD7406/2013/CHN | China | Shandong | 2013 | GI.5 |
| KR107909.1 | Norovirus GI.5 isolate<br>sewage/SD7302/2013/CHN | China | Shandong | 2013 | GI.5 |
| KR107908.1 | Norovirus GI.5 isolate<br>sewage/SD7205/2013/CHN | China | Shandong | 2013 | GI.5 |
| KR107907.1 | Norovirus GI.5 isolate<br>sewage/SD7106/2013/CHN | China | Shandong | 2013 | GI.5 |
| KR107906.1 | Norovirus GI.5 isolate<br>sewage/SD7104/2013/CHN | China | Shandong | 2013 | GI.5 |
| KR107905.1 | Norovirus GI.5 isolate<br>sewage/SD7102/2013/CHN | China | Shandong | 2013 | GI.5 |
| KR107904.1 | Norovirus GI.5 isolate<br>sewage/SD7009/2013/CHN | China | Shandong | 2013 | GI.5 |
| KR107903.1 | Norovirus GI.5 isolate<br>sewage/SD7006/2013/CHN | China | Shandong | 2013 | GI.5 |
| KR107902.1 | Norovirus GI.5 isolate<br>sewage/SD6910/2013/CHN | China | Shandong | 2013 | GI.5 |
| KR107901.1 | Norovirus GI.5 isolate<br>sewage/SD6909/2013/CHN | China | Shandong | 2013 | GI.5 |
| KR107900.1 | Norovirus GI.5 isolate<br>sewage/SD6907/2013/CHN | China | Shandong | 2013 | GI.5 |
| KR107899.1 | Norovirus GI.5 isolate<br>sewage/SD6905/2013/CHN | China | Shandong | 2013 | GI.5 |
| KR107898.1 | Norovirus GI.5 isolate<br>sewage/SD6903/2013/CHN | China | Shandong | 2013 | GI.5 |
| KR107897.1 | Norovirus GI.5 isolate<br>sewage/SD6703/2013/CHN | China | Shandong | 2013 | GI.5 |
| KR107896.1 | Norovirus GI.5 isolate<br>sewage/SD6605/2013/CHN | China | Shandong | 2013 | GI.5 |
| KR107895.1 | Norovirus GI.5 isolate<br>sewage/SD1506/2013/CHN | China | Shandong | 2013 | GI.5 |
| KR107894.1 | Norovirus GI.5 isolate<br>sewage/SD1306/2013/CHN | China | Shandong | 2013 | GI.5 |
| KR107893.1 | Norovirus GI.5 isolate<br>sewage/SD1305/2013/CHN | China | Shandong | 2013 | GI.5 |
| KR107892.1 | Norovirus GI.5 isolate<br>sewage/SD1304/2013/CHN | China | Shandong | 2013 | GI.5 |

Table S1. Cont.

|            |                                                  |       |          |      |      |
|------------|--------------------------------------------------|-------|----------|------|------|
| KR107891.1 | Norovirus GI.5 isolate<br>sewage/SD1303/2013/CHN | China | Shandong | 2013 | GI.5 |
| KR107890.1 | Norovirus GI.5 isolate<br>sewage/SD1302/2013/CHN | China | Shandong | 2013 | GI.5 |
| KR107889.1 | Norovirus GI.5 isolate<br>sewage/SD1301/2013/CHN | China | Shandong | 2013 | GI.5 |
| KR107888.1 | Norovirus GI.5 isolate<br>sewage/SD1208/2013/CHN | China | Shandong | 2013 | GI.5 |
| KR107887.1 | Norovirus GI.5 isolate<br>sewage/SD1206/2013/CHN | China | Shandong | 2013 | GI.5 |
| KR107886.1 | Norovirus GI.5 isolate<br>sewage/SD1205/2013/CHN | China | Shandong | 2013 | GI.5 |
| KR107885.1 | Norovirus GI.5 isolate<br>sewage/SD1204/2013/CHN | China | Shandong | 2013 | GI.5 |
| KR107884.1 | Norovirus GI.5 isolate<br>sewage/SD1202/2013/CHN | China | Shandong | 2013 | GI.5 |
| KR107883.1 | Norovirus GI.5 isolate<br>sewage/SD1201/2013/CHN | China | Shandong | 2013 | GI.5 |
| KR107882.1 | Norovirus GI.5 isolate<br>sewage/SD1106/2013/CHN | China | Shandong | 2013 | GI.5 |
| KR107881.1 | Norovirus GI.5 isolate<br>sewage/SD1105/2013/CHN | China | Shandong | 2013 | GI.5 |
| KR107880.1 | Norovirus GI.5 isolate<br>sewage/SD1102/2013/CHN | China | Shandong | 2013 | GI.5 |
| KR107879.1 | Norovirus GI.5 isolate<br>sewage/SD0909/2013/CHN | China | Shandong | 2013 | GI.5 |
| KR107878.1 | Norovirus GI.5 isolate<br>sewage/SD0907/2013/CHN | China | Shandong | 2013 | GI.5 |
| KR107877.1 | Norovirus GI.5 isolate<br>sewage/SD0906/2013/CHN | China | Shandong | 2013 | GI.5 |
| KR107876.1 | Norovirus GI.5 isolate<br>sewage/SD0905/2013/CHN | China | Shandong | 2013 | GI.5 |
| KR107875.1 | Norovirus GI.5 isolate<br>sewage/SD0901/2013/CHN | China | Shandong | 2013 | GI.5 |
| KR107874.1 | Norovirus GI.5 isolate<br>sewage/SD0409/2013/CHN | China | Shandong | 2013 | GI.5 |
| KR107873.1 | Norovirus GI.5 isolate<br>sewage/SD0302/2013/CHN | China | Shandong | 2013 | GI.5 |
| KR107872.1 | Norovirus GI.5 isolate<br>sewage/SD0209/2013/CHN | China | Shandong | 2013 | GI.5 |
| KR107871.1 | Norovirus GI.5 isolate<br>sewage/SD0107/2013/CHN | China | Shandong | 2013 | GI.5 |
| KR107870.1 | Norovirus GI.5 isolate<br>sewage/SD0106/2013/CHN | China | Shandong | 2013 | GI.5 |
| KR107869.1 | Norovirus GI.5 isolate<br>sewage/SD0105/2013/CHN | China | Shandong | 2013 | GI.5 |

Table S1. Cont.

|            |                                                  |       |          |      |      |
|------------|--------------------------------------------------|-------|----------|------|------|
| KR107868.1 | Norovirus GI.5 isolate<br>sewage/SD0104/2013/CHN | China | Shandong | 2013 | GI.5 |
| KR107867.1 | Norovirus GI.4 isolate<br>sewage/SD7103/2013/CHN | China | Shandong | 2013 | GI.4 |
| KR107866.1 | Norovirus GI.4 isolate<br>sewage/SD1403/2013/CHN | China | Shandong | 2013 | GI.4 |
| KR107865.1 | Norovirus GI.4 isolate<br>sewage/SD7401/2013/CHN | China | Shandong | 2013 | GI.4 |
| KR107864.1 | Norovirus GI.4 isolate<br>sewage/SD7108/2013/CHN | China | Shandong | 2013 | GI.4 |
| KR107863.1 | Norovirus GI.4 isolate<br>sewage/SD7008/2013/CHN | China | Shandong | 2013 | GI.4 |
| KR107862.1 | Norovirus GI.4 isolate<br>sewage/SD6709/2013/CHN | China | Shandong | 2013 | GI.4 |
| KR107861.1 | Norovirus GI.4 isolate<br>sewage/SD6708/2013/CHN | China | Shandong | 2013 | GI.4 |
| KR107860.1 | Norovirus GI.4 isolate<br>sewage/SD6607/2013/CHN | China | Shandong | 2013 | GI.4 |
| KR107859.1 | Norovirus GI.4 isolate<br>sewage/SD0609/2013/CHN | China | Shandong | 2013 | GI.4 |
| KR107858.1 | Norovirus GI.4 isolate<br>sewage/SD0602/2013/CHN | China | Shandong | 2013 | GI.4 |
| KR107857.1 | Norovirus GI.4 isolate<br>sewage/SD0310/2013/CHN | China | Shandong | 2013 | GI.4 |
| KR107856.1 | Norovirus GI.3 isolate<br>sewage/SD1405/2013/CHN | China | Shandong | 2013 | GI.3 |
| KR107855.1 | Norovirus GI.3 isolate<br>sewage/SD1404/2013/CHN | China | Shandong | 2013 | GI.3 |
| KR107854.1 | Norovirus GI.3 isolate<br>sewage/SD1401/2013/CHN | China | Shandong | 2013 | GI.3 |
| KR107853.1 | Norovirus GI.3 isolate<br>sewage/SD1104/2013/CHN | China | Shandong | 2013 | GI.3 |
| KR107852.1 | Norovirus GI.3 isolate<br>sewage/SD0509/2013/CHN | China | Shandong | 2013 | GI.3 |
| KR107851.1 | Norovirus GI.3 isolate<br>sewage/SD0508/2013/CHN | China | Shandong | 2013 | GI.3 |
| KR107850.1 | Norovirus GI.3 isolate<br>sewage/SD0504/2013/CHN | China | Shandong | 2013 | GI.3 |
| KR107849.1 | Norovirus GI.3 isolate<br>sewage/SD0207/2013/CHN | China | Shandong | 2013 | GI.3 |
| KR107848.1 | Norovirus GI.3 isolate<br>sewage/SD7605/2013/CHN | China | Shandong | 2013 | GI.3 |
| KR107847.1 | Norovirus GI.3 isolate<br>sewage/SD7610/2013/CHN | China | Shandong | 2013 | GI.3 |
| KR107846.1 | Norovirus GI.3 isolate<br>sewage/SD7602/2013/CHN | China | Shandong | 2013 | GI.3 |

Table S1. Cont.

|            |                                                  |       |          |      |      |
|------------|--------------------------------------------------|-------|----------|------|------|
| KR107845.1 | Norovirus GI.3 isolate<br>sewage/SD7601/2013/CHN | China | Shandong | 2013 | GI.3 |
| KR107844.1 | Norovirus GI.3 isolate<br>sewage/SD7509/2013/CHN | China | Shandong | 2013 | GI.3 |
| KR107843.1 | Norovirus GI.3 isolate<br>sewage/SD7408/2013/CHN | China | Shandong | 2013 | GI.3 |
| KR107842.1 | Norovirus GI.3 isolate<br>sewage/SD7403/2013/CHN | China | Shandong | 2013 | GI.3 |
| KR107841.1 | Norovirus GI.3 isolate<br>sewage/SD7306/2013/CHN | China | Shandong | 2013 | GI.3 |
| KR107840.1 | Norovirus GI.3 isolate<br>sewage/SD7303/2013/CHN | China | Shandong | 2013 | GI.3 |
| KR107839.1 | Norovirus GI.3 isolate<br>sewage/SD7301/2013/CHN | China | Shandong | 2013 | GI.3 |
| KR107838.1 | Norovirus GI.3 isolate<br>sewage/SD7207/2013/CHN | China | Shandong | 2013 | GI.3 |
| KR107837.1 | Norovirus GI.3 isolate<br>sewage/SD7203/2013/CHN | China | Shandong | 2013 | GI.3 |
| KR107836.1 | Norovirus GI.3 isolate<br>sewage/SD7110/2013/CHN | China | Shandong | 2013 | GI.3 |
| KR107835.1 | Norovirus GI.3 isolate<br>sewage/SD7109/2013/CHN | China | Shandong | 2013 | GI.3 |
| KR107834.1 | Norovirus GI.3 isolate<br>sewage/SD7105/2013/CHN | China | Shandong | 2013 | GI.3 |
| KR107833.1 | Norovirus GI.3 isolate<br>sewage/SD7101/2013/CHN | China | Shandong | 2013 | GI.3 |
| KR107832.1 | Norovirus GI.3 isolate<br>sewage/SD7007/2013/CHN | China | Shandong | 2013 | GI.3 |
| KR107831.1 | Norovirus GI.3 isolate<br>sewage/SD7003/2013/CHN | China | Shandong | 2013 | GI.3 |
| KR107830.1 | Norovirus GI.3 isolate<br>sewage/SD6902/2013/CHN | China | Shandong | 2013 | GI.3 |
| KR107829.1 | Norovirus GI.3 isolate<br>sewage/SD6707/2013/CHN | China | Shandong | 2013 | GI.3 |
| KR107828.1 | Norovirus GI.3 isolate<br>sewage/SD6706/2013/CHN | China | Shandong | 2013 | GI.3 |
| KR107827.1 | Norovirus GI.3 isolate<br>sewage/SD6705/2013/CHN | China | Shandong | 2013 | GI.3 |
| KR107826.1 | Norovirus GI.3 isolate<br>sewage/SD6608/2013/CHN | China | Shandong | 2013 | GI.3 |
| KR107825.1 | Norovirus GI.3 isolate<br>sewage/SD6606/2013/CHN | China | Shandong | 2013 | GI.3 |
| KR107824.1 | Norovirus GI.3 isolate<br>sewage/SD1510/2013/CHN | China | Shandong | 2013 | GI.3 |
| KR107823.1 | Norovirus GI.3 isolate<br>sewage/SD1509/2013/CHN | China | Shandong | 2013 | GI.3 |



Table S1. Cont.

|            |                                                  |       |          |      |      |
|------------|--------------------------------------------------|-------|----------|------|------|
| KR107822.1 | Norovirus GI.3 isolate<br>sewage/SD1507/2013/CHN | China | Shandong | 2013 | GI.3 |
| KR107821.1 | Norovirus GI.3 isolate<br>sewage/SD1504/2013/CHN | China | Shandong | 2013 | GI.3 |
| KR107820.1 | Norovirus GI.3 isolate<br>sewage/SD1503/2013/CHN | China | Shandong | 2013 | GI.3 |
| KR107819.1 | Norovirus GI.3 isolate<br>sewage/SD1501/2013/CHN | China | Shandong | 2013 | GI.3 |
| KR107818.1 | Norovirus GI.3 isolate<br>sewage/SD1308/2013/CHN | China | Shandong | 2013 | GI.3 |
| KR107817.1 | Norovirus GI.3 isolate<br>sewage/SD1307/2013/CHN | China | Shandong | 2013 | GI.3 |
| KR107816.1 | Norovirus GI.3 isolate<br>sewage/SD1210/2013/CHN | China | Shandong | 2013 | GI.3 |
| KR107815.1 | Norovirus GI.3 isolate<br>sewage/SD1108/2013/CHN | China | Shandong | 2013 | GI.3 |
| KR107814.1 | Norovirus GI.3 isolate<br>sewage/SD0910/2013/CHN | China | Shandong | 2013 | GI.3 |
| KR107813.1 | Norovirus GI.3 isolate<br>sewage/SD0208/2013/CHN | China | Shandong | 2013 | GI.3 |
| KR107812.1 | Norovirus GI.3 isolate<br>sewage/SD0203/2013/CHN | China | Shandong | 2013 | GI.3 |
| KR107811.1 | Norovirus GI.2 isolate<br>sewage/SD7609/2013/CHN | China | Shandong | 2013 | GI.2 |
| KR107810.1 | Norovirus GI.2 isolate<br>sewage/SD7606/2013/CHN | China | Shandong | 2013 | GI.2 |
| KR107809.1 | Norovirus GI.2 isolate<br>sewage/SD7603/2013/CHN | China | Shandong | 2013 | GI.2 |
| KR107808.1 | Norovirus GI.2 isolate<br>sewage/SD7508/2013/CHN | China | Shandong | 2013 | GI.2 |
| KR107807.1 | Norovirus GI.2 isolate<br>sewage/SD7502/2013/CHN | China | Shandong | 2013 | GI.2 |
| KR107806.1 | Norovirus GI.2 isolate<br>sewage/SD7409/2013/CHN | China | Shandong | 2013 | GI.2 |
| KR107805.1 | Norovirus GI.2 isolate<br>sewage/SD7407/2013/CHN | China | Shandong | 2013 | GI.2 |
| KR107804.1 | Norovirus GI.2 isolate<br>sewage/SD7404/2013/CHN | China | Shandong | 2013 | GI.2 |
| KR107803.1 | Norovirus GI.2 isolate<br>sewage/SD7402/2013/CHN | China | Shandong | 2013 | GI.2 |
| KR107802.1 | Norovirus GI.2 isolate<br>sewage/SD7304/2013/CHN | China | Shandong | 2013 | GI.2 |
| KR107801.1 | Norovirus GI.2 isolate<br>sewage/SD7204/2013/CHN | China | Shandong | 2013 | GI.2 |
| KR107800.1 | Norovirus GI.2 isolate<br>sewage/SD7010/2013/CHN | China | Shandong | 2013 | GI.2 |

Table S1. Cont.

|            |                                                  |       |          |      |      |
|------------|--------------------------------------------------|-------|----------|------|------|
| KR107799.1 | Norovirus GI.2 isolate<br>sewage/SD7005/2013/CHN | China | Shandong | 2013 | GI.2 |
| KR107798.1 | Norovirus GI.2 isolate<br>sewage/SD7004/2013/CHN | China | Shandong | 2013 | GI.2 |
| KR107797.1 | Norovirus GI.2 isolate<br>sewage/SD7002/2013/CHN | China | Shandong | 2013 | GI.2 |
| KR107796.1 | Norovirus GI.2 isolate<br>sewage/SD7001/2013/CHN | China | Shandong | 2013 | GI.2 |
| KR107795.1 | Norovirus GI.2 isolate<br>sewage/SD6908/2013/CHN | China | Shandong | 2013 | GI.2 |
| KR107794.1 | Norovirus GI.2 isolate<br>sewage/SD6906/2013/CHN | China | Shandong | 2013 | GI.2 |
| KR107793.1 | Norovirus GI.2 isolate<br>sewage/SD6904/2013/CHN | China | Shandong | 2013 | GI.2 |
| KR107792.1 | Norovirus GI.2 isolate<br>sewage/SD6810/2013/CHN | China | Shandong | 2013 | GI.2 |
| KR107791.1 | Norovirus GI.2 isolate<br>sewage/SD6809/2013/CHN | China | Shandong | 2013 | GI.2 |
| KR107790.1 | Norovirus GI.2 isolate<br>sewage/SD6806/2013/CHN | China | Shandong | 2013 | GI.2 |
| KR107789.1 | Norovirus GI.2 isolate<br>sewage/SD6805/2013/CHN | China | Shandong | 2013 | GI.2 |
| KR107788.1 | Norovirus GI.2 isolate<br>sewage/SD6804/2013/CHN | China | Shandong | 2013 | GI.2 |
| KR107787.1 | Norovirus GI.2 isolate<br>sewage/SD6803/2013/CHN | China | Shandong | 2013 | GI.2 |
| KR107786.1 | Norovirus GI.2 isolate<br>sewage/SD6802/2013/CHN | China | Shandong | 2013 | GI.2 |
| KR107785.1 | Norovirus GI.2 isolate<br>sewage/SD6702/2013/CHN | China | Shandong | 2013 | GI.2 |
| KR107784.1 | Norovirus GI.2 isolate<br>sewage/SD1505/2013/CHN | China | Shandong | 2013 | GI.2 |
| KR107783.1 | Norovirus GI.2 isolate<br>sewage/SD1410/2013/CHN | China | Shandong | 2013 | GI.2 |
| KR107782.1 | Norovirus GI.2 isolate<br>sewage/SD6602/2013/CHN | China | Shandong | 2013 | GI.2 |
| KR107781.1 | Norovirus GI.2 isolate<br>sewage/SD1409/2013/CHN | China | Shandong | 2013 | GI.2 |
| KR107780.1 | Norovirus GI.2 isolate<br>sewage/SD1407/2013/CHN | China | Shandong | 2013 | GI.2 |
| KR107779.1 | Norovirus GI.2 isolate<br>sewage/SD1209/2013/CHN | China | Shandong | 2013 | GI.2 |
| KR107778.1 | Norovirus GI.2 isolate<br>sewage/SD1207/2013/CHN | China | Shandong | 2013 | GI.2 |
| KR107777.1 | Norovirus GI.2 isolate<br>sewage/SD1110/2013/CHN | China | Shandong | 2013 | GI.2 |

Table S1. Cont.

|            |                                                  |       |          |      |      |
|------------|--------------------------------------------------|-------|----------|------|------|
| KR107776.1 | Norovirus GI.2 isolate<br>sewage/SD1109/2013/CHN | China | Shandong | 2013 | GI.2 |
| KR107775.1 | Norovirus GI.2 isolate<br>sewage/SD1103/2013/CHN | China | Shandong | 2013 | GI.2 |
| KR107774.1 | Norovirus GI.2 isolate<br>sewage/SD1101/2013/CHN | China | Shandong | 2013 | GI.2 |
| KR107773.1 | Norovirus GI.2 isolate<br>sewage/SD0908/2013/CHN | China | Shandong | 2013 | GI.2 |
| KR107772.1 | Norovirus GI.2 isolate<br>sewage/SD0903/2013/CHN | China | Shandong | 2013 | GI.2 |
| KR107771.1 | Norovirus GI.2 isolate<br>sewage/SD0902/2013/CHN | China | Shandong | 2013 | GI.2 |
| KR107770.1 | Norovirus GI.2 isolate<br>sewage/SD0604/2013/CHN | China | Shandong | 2013 | GI.2 |
| KR107769.1 | Norovirus GI.2 isolate<br>sewage/SD0510/2013/CHN | China | Shandong | 2013 | GI.2 |
| KR107768.1 | Norovirus GI.2 isolate<br>sewage/SD0503/2013/CHN | China | Shandong | 2013 | GI.2 |
| KR107767.1 | Norovirus GI.2 isolate<br>sewage/SD0502/2013/CHN | China | Shandong | 2013 | GI.2 |
| KR107766.1 | Norovirus GI.2 isolate<br>sewage/SD0501/2013/CHN | China | Shandong | 2013 | GI.2 |
| KR107765.1 | Norovirus GI.2 isolate<br>sewage/SD0410/2013/CHN | China | Shandong | 2013 | GI.2 |
| KR107764.1 | Norovirus GI.2 isolate<br>sewage/SD0408/2013/CHN | China | Shandong | 2013 | GI.2 |
| KR107763.1 | Norovirus GI.2 isolate<br>sewage/SD0405/2013/CHN | China | Shandong | 2013 | GI.2 |
| KR107762.1 | Norovirus GI.2 isolate<br>sewage/SD0403/2013/CHN | China | Shandong | 2013 | GI.2 |
| KR107761.1 | Norovirus GI.2 isolate<br>sewage/SD0402/2013/CHN | China | Shandong | 2013 | GI.2 |
| KR107760.1 | Norovirus GI.2 isolate<br>sewage/SD0102/2013/CHN | China | Shandong | 2013 | GI.2 |
| KR107759.1 | Norovirus GI.2 isolate<br>sewage/SD0202/2013/CHN | China | Shandong | 2013 | GI.2 |
| KR107758.1 | Norovirus GI.2 isolate<br>sewage/SD0309/2013/CHN | China | Shandong | 2013 | GI.2 |
| KR107757.1 | Norovirus GI.2 isolate<br>sewage/SD0308/2013/CHN | China | Shandong | 2013 | GI.2 |
| KR107756.1 | Norovirus GI.2 isolate<br>sewage/SD0307/2013/CHN | China | Shandong | 2013 | GI.2 |
| KR107755.1 | Norovirus GI.2 isolate<br>sewage/SD0306/2013/CHN | China | Shandong | 2013 | GI.2 |
| KR107754.1 | Norovirus GI.2 isolate<br>sewage/SD0305/2013/CHN | China | Shandong | 2013 | GI.2 |

Table S1. Cont.

|            |                                                  |       |          |      |      |
|------------|--------------------------------------------------|-------|----------|------|------|
| KR107753.1 | Norovirus GI.2 isolate<br>sewage/SD0304/2013/CHN | China | Shandong | 2013 | GI.2 |
| KR107752.1 | Norovirus GI.2 isolate<br>sewage/SD0303/2013/CHN | China | Shandong | 2013 | GI.2 |
| KR107751.1 | Norovirus GI.2 isolate<br>sewage/SD0205/2013/CHN | China | Shandong | 2013 | GI.2 |
| KR107750.1 | Norovirus GI.2 isolate<br>sewage/SD0101/2013/CHN | China | Shandong | 2013 | GI.2 |
| KR107749.1 | Norovirus GI.1 isolate<br>sewage/SD6701/2013/CHN | China | Shandong | 2013 | GI.1 |
| KR107748.1 | Norovirus GI.1 isolate<br>sewage/SD7305/2013/CHN | China | Shandong | 2013 | GI.1 |
| KR107747.1 | Norovirus GI.1 isolate<br>sewage/SD6801/2013/CHN | China | Shandong | 2013 | GI.1 |
| KR107746.1 | Norovirus GI.1 isolate<br>sewage/SD1502/2013/CHN | China | Shandong | 2013 | GI.1 |
| KR107745.1 | Norovirus GI.1 isolate<br>sewage/SD1402/2013/CHN | China | Shandong | 2013 | GI.1 |
| KR107744.1 | Norovirus GI.1 isolate<br>sewage/SD1310/2013/CHN | China | Shandong | 2013 | GI.1 |
| KR107743.1 | Norovirus GI.1 isolate<br>sewage/SD7405/2013/CHN | China | Shandong | 2013 | GI.1 |
| KR107742.1 | Norovirus GI.1 isolate<br>sewage/SD1203/2013/CHN | China | Shandong | 2013 | GI.1 |
| KR107741.1 | Norovirus GI.1 isolate<br>sewage/SD0904/2013/CHN | China | Shandong | 2013 | GI.1 |
| KR107740.1 | Norovirus GI.1 isolate<br>sewage/SD0608/2013/CHN | China | Shandong | 2013 | GI.1 |
| KR107739.1 | Norovirus GI.1 isolate<br>sewage/SD0610/2013/CHN | China | Shandong | 2013 | GI.1 |
| KR107738.1 | Norovirus GI.1 isolate<br>sewage/SD0607/2013/CHN | China | Shandong | 2013 | GI.1 |
| KR107737.1 | Norovirus GI.1 isolate<br>sewage/SD0606/2013/CHN | China | Shandong | 2013 | GI.1 |
| KR107736.1 | Norovirus GI.1 isolate<br>sewage/SD0605/2013/CHN | China | Shandong | 2013 | GI.1 |
| KR107735.1 | Norovirus GI.1 isolate<br>sewage/SD0603/2013/CHN | China | Shandong | 2013 | GI.1 |
| KR107734.1 | Norovirus GI.1 isolate<br>sewage/SD0507/2013/CHN | China | Shandong | 2013 | GI.1 |
| KR107733.1 | Norovirus GI.1 isolate<br>sewage/SD0506/2013/CHN | China | Shandong | 2013 | GI.1 |
| KR107732.1 | Norovirus GI.1 isolate<br>sewage/SD0505/2013/CHN | China | Shandong | 2013 | GI.1 |
| KR107731.1 | Norovirus GI.1 isolate<br>sewage/SD0407/2013/CHN | China | Shandong | 2013 | GI.1 |

Table S1. Cont.

|            |                                                           |       |          |      |        |
|------------|-----------------------------------------------------------|-------|----------|------|--------|
| KR107730.1 | Norovirus GI.1 isolate<br>sewage/SD0406/2013/CHN          | China | Shandong | 2013 | GI.1   |
| KR107729.1 | Norovirus GI.1 isolate<br>sewage/SD0401/2013/CHN          | China | Shandong | 2013 | GI.1   |
| KR107728.1 | Norovirus GI.1 isolate<br>sewage/SD0201/2013/CHN          | China | Shandong | 2013 | GI.1   |
| KR107727.1 | Norovirus GII.2 isolate<br>sewage/GII.2/SD8106/2013/CHN   | China | Shandong | 2013 | GII.2  |
| KR107726.1 | Norovirus GII.2 isolate<br>sewage/GII.2/SD8610/2013/CHN   | China | Shandong | 2013 | GII.2  |
| KR107725.1 | Norovirus GII.2 isolate<br>sewage/GII.2/SD3010/2013/CHN   | China | Shandong | 2013 | GII.2  |
| KR107724.1 | Norovirus GII.2 isolate<br>sewage/GII.2/SD2601/2013/CHN   | China | Shandong | 2013 | GII.2  |
| KR107723.1 | Norovirus GII.13 isolate<br>sewage/GII.13/SD8903/2013/CHN | China | Shandong | 2013 | GII.13 |
| KR107722.1 | Norovirus GII.13 isolate<br>sewage/GII.13/SD2705/2013/CHN | China | Shandong | 2013 | GII.13 |
| KR107721.1 | Norovirus GII.13 isolate<br>sewage/GII.13/SD1906/2013/CHN | China | Shandong | 2013 | GII.13 |
| KR107720.1 | Norovirus GII.6 isolate<br>sewage/GII.6/SD9007/2013/CHN   | China | Shandong | 2013 | GII.6  |
| KR107719.1 | Norovirus GII.6 isolate<br>sewage/GII.6/SD8810/2013/CHN   | China | Shandong | 2013 | GII.6  |
| KR107718.1 | Norovirus GII.6 isolate<br>sewage/GII.6/SD8708/2013/CHN   | China | Shandong | 2013 | GII.6  |
| KR107717.1 | Norovirus GII.6 isolate<br>sewage/GII.6/SD8707/2013/CHN   | China | Shandong | 2013 | GII.6  |
| KR107716.1 | Norovirus GII.6 isolate<br>sewage/GII.6/SD8705/2013/CHN   | China | Shandong | 2013 | GII.6  |
| KR107715.1 | Norovirus GII.6 isolate<br>sewage/GII.6/SD8601/2013/CHN   | China | Shandong | 2013 | GII.6  |
| KR107714.1 | Norovirus GII.6 isolate<br>sewage/GII.6/SD8310/2013/CHN   | China | Shandong | 2013 | GII.6  |
| KR107713.1 | Norovirus GII.6 isolate<br>sewage/GII.6/SD8301/2013/CHN   | China | Shandong | 2013 | GII.6  |
| KR107712.1 | Norovirus GII.6 isolate<br>sewage/GII.6/SD8006/2013/CHN   | China | Shandong | 2013 | GII.6  |
| KR107711.1 | Norovirus GII.6 isolate<br>sewage/GII.6/SD2810/2013/CHN   | China | Shandong | 2013 | GII.6  |
| KR107710.1 | Norovirus GII.6 isolate<br>sewage/GII.6/SD2803/2013/CHN   | China | Shandong | 2013 | GII.6  |
| KR107709.1 | Norovirus GII.6 isolate<br>sewage/GII.6/SD2701/2013/CHN   | China | Shandong | 2013 | GII.6  |
| KR107708.1 | Norovirus GII.6 isolate<br>sewage/GII.6/SD1706/2013/CHN   | China | Shandong | 2013 | GII.6  |

Table S1. Cont.

|            |                                                         |       |          |      |       |
|------------|---------------------------------------------------------|-------|----------|------|-------|
| KR107707.1 | Norovirus GII.6 isolate<br>sewage/GII.6/SD2802/2013/CHN | China | Shandong | 2013 | GII.6 |
| KR107706.1 | Norovirus GII.6 isolate<br>sewage/GII.6/SD2706/2013/CHN | China | Shandong | 2013 | GII.6 |
| KR107705.1 | Norovirus GII.6 isolate<br>sewage/GII.6/SD2704/2013/CHN | China | Shandong | 2013 | GII.6 |
| KR107704.1 | Norovirus GII.6 isolate<br>sewage/GII.6/SD2610/2013/CHN | China | Shandong | 2013 | GII.6 |
| KR107703.1 | Norovirus GII.6 isolate<br>sewage/GII.6/SD2607/2013/CHN | China | Shandong | 2013 | GII.6 |
| KR107702.1 | Norovirus GII.6 isolate<br>sewage/GII.6/SD2606/2013/CHN | China | Shandong | 2013 | GII.6 |
| KR107701.1 | Norovirus GII.6 isolate<br>sewage/GII.6/SD2605/2013/CHN | China | Shandong | 2013 | GII.6 |
| KR107700.1 | Norovirus GII.6 isolate<br>sewage/GII.6/SD2602/2013/CHN | China | Shandong | 2013 | GII.6 |
| KR107699.1 | Norovirus GII.6 isolate<br>sewage/GII.6/SD2404/2013/CHN | China | Shandong | 2013 | GII.6 |
| KR107698.1 | Norovirus GII.6 isolate<br>sewage/GII.6/SD2103/2013/CHN | China | Shandong | 2013 | GII.6 |
| KR107697.1 | Norovirus GII.6 isolate<br>sewage/GII.6/SD1710/2013/CHN | China | Shandong | 2013 | GII.6 |
| KR107696.1 | Norovirus GII.6 isolate<br>sewage/GII.6/SD1607/2013/CHN | China | Shandong | 2013 | GII.6 |
| KR107695.1 | Norovirus GII.6 isolate<br>sewage/GII.6/SD1608/2013/CHN | China | Shandong | 2013 | GII.6 |
| KR107694.1 | Norovirus GII.3 isolate<br>sewage/GII.3/SD1605/2013/CHN | China | Shandong | 2013 | GII.3 |
| KR107693.1 | Norovirus GII.3 isolate<br>sewage/GII.3/SD1602/2013/CHN | China | Shandong | 2013 | GII.3 |
| KR107692.1 | Norovirus GII.3 isolate<br>sewage/GII.3/SD9006/2013/CHN | China | Shandong | 2013 | GII.3 |
| KR107691.1 | Norovirus GII.3 isolate<br>sewage/GII.3/SD9004/2013/CHN | China | Shandong | 2013 | GII.3 |
| KR107690.1 | Norovirus GII.3 isolate<br>sewage/GII.3/SD9003/2013/CHN | China | Shandong | 2013 | GII.3 |
| KR107689.1 | Norovirus GII.3 isolate<br>sewage/GII.3/SD9002/2013/CHN | China | Shandong | 2013 | GII.3 |
| KR107688.1 | Norovirus GII.3 isolate<br>sewage/GII.3/SD8803/2013/CHN | China | Shandong | 2013 | GII.3 |
| KR107687.1 | Norovirus GII.3 isolate<br>sewage/GII.3/SD8703/2013/CHN | China | Shandong | 2013 | GII.3 |
| KR107686.1 | Norovirus GII.3 isolate<br>sewage/GII.3/SD8606/2013/CHN | China | Shandong | 2013 | GII.3 |
| KR107685.1 | Norovirus GII.3 isolate<br>sewage/GII.3/SD8503/2013/CHN | China | Shandong | 2013 | GII.3 |

Table S1. Cont.

|            |                                                         |       |          |      |       |
|------------|---------------------------------------------------------|-------|----------|------|-------|
| KR107684.1 | Norovirus GII.3 isolate<br>sewage/GII.3/SD8406/2013/CHN | China | Shandong | 2013 | GII.3 |
| KR107683.1 | Norovirus GII.3 isolate<br>sewage/GII.3/SD8405/2013/CHN | China | Shandong | 2013 | GII.3 |
| KR107682.1 | Norovirus GII.3 isolate<br>sewage/GII.3/SD8404/2013/CHN | China | Shandong | 2013 | GII.3 |
| KR107681.1 | Norovirus GII.3 isolate<br>sewage/GII.3/SD8403/2013/CHN | China | Shandong | 2013 | GII.3 |
| KR107680.1 | Norovirus GII.3 isolate<br>sewage/GII.3/SD8309/2013/CHN | China | Shandong | 2013 | GII.3 |
| KR107679.1 | Norovirus GII.3 isolate<br>sewage/GII.3/SD8308/2013/CHN | China | Shandong | 2013 | GII.3 |
| KR107678.1 | Norovirus GII.3 isolate<br>sewage/GII.3/SD8306/2013/CHN | China | Shandong | 2013 | GII.3 |
| KR107677.1 | Norovirus GII.3 isolate<br>sewage/GII.3/SD8206/2013/CHN | China | Shandong | 2013 | GII.3 |
| KR107676.1 | Norovirus GII.3 isolate<br>sewage/GII.3/SD8203/2013/CHN | China | Shandong | 2013 | GII.3 |
| KR107675.1 | Norovirus GII.3 isolate<br>sewage/GII.3/SD8109/2013/CHN | China | Shandong | 2013 | GII.3 |
| KR107674.1 | Norovirus GII.3 isolate<br>sewage/GII.3/SD8108/2013/CHN | China | Shandong | 2013 | GII.3 |
| KR107673.1 | Norovirus GII.3 isolate<br>sewage/GII.3/SD8107/2013/CHN | China | Shandong | 2013 | GII.3 |
| KR107672.1 | Norovirus GII.3 isolate<br>sewage/GII.3/SD8105/2013/CHN | China | Shandong | 2013 | GII.3 |
| KR107671.1 | Norovirus GII.3 isolate<br>sewage/GII.3/SD8101/2013/CHN | China | Shandong | 2013 | GII.3 |
| KR107670.1 | Norovirus GII.3 isolate<br>sewage/GII.3/SD8004/2013/CHN | China | Shandong | 2013 | GII.3 |
| KR107669.1 | Norovirus GII.3 isolate<br>sewage/GII.3/SD3008/2013/CHN | China | Shandong | 2013 | GII.3 |
| KR107668.1 | Norovirus GII.3 isolate<br>sewage/GII.3/SD3007/2013/CHN | China | Shandong | 2013 | GII.3 |
| KR107667.1 | Norovirus GII.3 isolate<br>sewage/GII.3/SD3006/2013/CHN | China | Shandong | 2013 | GII.3 |
| KR107666.1 | Norovirus GII.3 isolate<br>sewage/GII.3/SD3005/2013/CHN | China | Shandong | 2013 | GII.3 |
| KR107665.1 | Norovirus GII.3 isolate<br>sewage/GII.3/SD3002/2013/CHN | China | Shandong | 2013 | GII.3 |
| KR107664.1 | Norovirus GII.3 isolate<br>sewage/GII.3/SD3001/2013/CHN | China | Shandong | 2013 | GII.3 |
| KR107663.1 | Norovirus GII.3 isolate<br>sewage/GII.3/SD2910/2013/CHN | China | Shandong | 2013 | GII.3 |
| KR107662.1 | Norovirus GII.3 isolate<br>sewage/GII.3/SD2909/2013/CHN | China | Shandong | 2013 | GII.3 |

Table S1. Cont.

|            |                                                         |       |          |      |       |
|------------|---------------------------------------------------------|-------|----------|------|-------|
| KR107661.1 | Norovirus GII.3 isolate<br>sewage/GII.3/SD2908/2013/CHN | China | Shandong | 2013 | GII.3 |
| KR107660.1 | Norovirus GII.3 isolate<br>sewage/GII.3/SD2905/2013/CHN | China | Shandong | 2013 | GII.3 |
| KR107659.1 | Norovirus GII.3 isolate<br>sewage/GII.3/SD2903/2013/CHN | China | Shandong | 2013 | GII.3 |
| KR107658.1 | Norovirus GII.3 isolate<br>sewage/GII.3/SD2902/2013/CHN | China | Shandong | 2013 | GII.3 |
| KR107657.1 | Norovirus GII.3 isolate<br>sewage/GII.3/SD2809/2013/CHN | China | Shandong | 2013 | GII.3 |
| KR107656.1 | Norovirus GII.3 isolate<br>sewage/GII.3/SD2808/2013/CHN | China | Shandong | 2013 | GII.3 |
| KR107655.1 | Norovirus GII.3 isolate<br>sewage/GII.3/SD2709/2013/CHN | China | Shandong | 2013 | GII.3 |
| KR107654.1 | Norovirus GII.3 isolate<br>sewage/GII.3/SD2708/2013/CHN | China | Shandong | 2013 | GII.3 |
| KR107653.1 | Norovirus GII.3 isolate<br>sewage/GII.3/SD2707/2013/CHN | China | Shandong | 2013 | GII.3 |
| KR107652.1 | Norovirus GII.3 isolate<br>sewage/GII.3/SD2702/2013/CHN | China | Shandong | 2013 | GII.3 |
| KR107651.1 | Norovirus GII.3 isolate<br>sewage/GII.3/SD2603/2013/CHN | China | Shandong | 2013 | GII.3 |
| KR107650.1 | Norovirus GII.3 isolate<br>sewage/GII.3/SD2509/2013/CHN | China | Shandong | 2013 | GII.3 |
| KR107649.1 | Norovirus GII.3 isolate<br>sewage/GII.3/SD2407/2013/CHN | China | Shandong | 2013 | GII.3 |
| KR107648.1 | Norovirus GII.3 isolate<br>sewage/GII.3/SD2406/2013/CHN | China | Shandong | 2013 | GII.3 |
| KR107647.1 | Norovirus GII.3 isolate<br>sewage/GII.3/SD2110/2013/CHN | China | Shandong | 2013 | GII.3 |
| KR107646.1 | Norovirus GII.3 isolate<br>sewage/GII.3/SD2109/2013/CHN | China | Shandong | 2013 | GII.3 |
| KR107645.1 | Norovirus GII.3 isolate<br>sewage/GII.3/SD2108/2013/CHN | China | Shandong | 2013 | GII.3 |
| KR107644.1 | Norovirus GII.3 isolate<br>sewage/GII.3/SD2107/2013/CHN | China | Shandong | 2013 | GII.3 |
| KR107643.1 | Norovirus GII.3 isolate<br>sewage/GII.3/SD2105/2013/CHN | China | Shandong | 2013 | GII.3 |
| KR107642.1 | Norovirus GII.3 isolate<br>sewage/GII.3/SD2104/2013/CHN | China | Shandong | 2013 | GII.3 |
| KR107641.1 | Norovirus GII.3 isolate<br>sewage/GII.3/SD2102/2013/CHN | China | Shandong | 2013 | GII.3 |
| KR107640.1 | Norovirus GII.3 isolate<br>sewage/GII.3/SD2101/2013/CHN | China | Shandong | 2013 | GII.3 |
| KR107639.1 | Norovirus GII.3 isolate<br>sewage/GII.3/SD2010/2013/CHN | China | Shandong | 2013 | GII.3 |



Table S1. Cont.

|            |                                                         |       |          |      |       |
|------------|---------------------------------------------------------|-------|----------|------|-------|
| KR107638.1 | Norovirus GII.3 isolate<br>sewage/GII.3/SD2009/2013/CHN | China | Shandong | 2013 | GII.3 |
| KR107637.1 | Norovirus GII.3 isolate<br>sewage/GII.3/SD2008/2013/CHN | China | Shandong | 2013 | GII.3 |
| KR107636.1 | Norovirus GII.3 isolate<br>sewage/GII.3/SD2006/2013/CHN | China | Shandong | 2013 | GII.3 |
| KR107635.1 | Norovirus GII.3 isolate<br>sewage/GII.3/SD2005/2013/CHN | China | Shandong | 2013 | GII.3 |
| KR107634.1 | Norovirus GII.3 isolate<br>sewage/GII.3/SD2004/2013/CHN | China | Shandong | 2013 | GII.3 |
| KR107633.1 | Norovirus GII.3 isolate<br>sewage/GII.3/SD2003/2013/CHN | China | Shandong | 2013 | GII.3 |
| KR107632.1 | Norovirus GII.3 isolate<br>sewage/GII.3/SD2002/2013/CHN | China | Shandong | 2013 | GII.3 |
| KR107631.1 | Norovirus GII.3 isolate<br>sewage/GII.3/SD2001/2013/CHN | China | Shandong | 2013 | GII.3 |
| KR107630.1 | Norovirus GII.3 isolate<br>sewage/GII.3/SD1910/2013/CHN | China | Shandong | 2013 | GII.3 |
| KR107629.1 | Norovirus GII.3 isolate<br>sewage/GII.3/SD1908/2013/CHN | China | Shandong | 2013 | GII.3 |
| KR107628.1 | Norovirus GII.3 isolate<br>sewage/GII.3/SD1907/2013/CHN | China | Shandong | 2013 | GII.3 |
| KR107627.1 | Norovirus GII.3 isolate<br>sewage/GII.3/SD1905/2013/CHN | China | Shandong | 2013 | GII.3 |
| KR107626.1 | Norovirus GII.3 isolate<br>sewage/GII.3/SD1904/2013/CHN | China | Shandong | 2013 | GII.3 |
| KR107625.1 | Norovirus GII.3 isolate<br>sewage/GII.3/SD1902/2013/CHN | China | Shandong | 2013 | GII.3 |
| KR107624.1 | Norovirus GII.3 isolate<br>sewage/GII.3/SD1901/2013/CHN | China | Shandong | 2013 | GII.3 |
| KR107623.1 | Norovirus GII.3 isolate<br>sewage/GII.3/SD1810/2013/CHN | China | Shandong | 2013 | GII.3 |
| KR107622.1 | Norovirus GII.3 isolate<br>sewage/GII.3/SD1808/2013/CHN | China | Shandong | 2013 | GII.3 |
| KR107621.1 | Norovirus GII.3 isolate<br>sewage/GII.3/SD1807/2013/CHN | China | Shandong | 2013 | GII.3 |
| KR107620.1 | Norovirus GII.3 isolate<br>sewage/GII.3/SD1805/2013/CHN | China | Shandong | 2013 | GII.3 |
| KR107619.1 | Norovirus GII.3 isolate<br>sewage/GII.3/SD1804/2013/CHN | China | Shandong | 2013 | GII.3 |
| KR107618.1 | Norovirus GII.3 isolate<br>sewage/GII.3/SD1801/2013/CHN | China | Shandong | 2013 | GII.3 |
| KR107617.1 | Norovirus GII.3 isolate<br>sewage/GII.3/SD1709/2013/CHN | China | Shandong | 2013 | GII.3 |
| KR107616.1 | Norovirus GII.3 isolate<br>sewage/GII.3/SD1708/2013/CHN | China | Shandong | 2013 | GII.3 |

Table S1. Cont.

|            |                                                           |       |          |      |        |
|------------|-----------------------------------------------------------|-------|----------|------|--------|
| KR107615.1 | Norovirus GII.3 isolate<br>sewage/GII.3/SD1704/2013/CHN   | China | Shandong | 2013 | GII.3  |
| KR107614.1 | Norovirus GII.3 isolate<br>sewage/GII.3/SD1703/2013/CHN   | China | Shandong | 2013 | GII.3  |
| KR107613.1 | Norovirus GII.3 isolate<br>sewage/GII.3/SD1702/2013/CHN   | China | Shandong | 2013 | GII.3  |
| KR107612.1 | Norovirus GII.3 isolate<br>sewage/GII.3/SD1701/2013/CHN   | China | Shandong | 2013 | GII.3  |
| KR107611.1 | Norovirus GII.3 isolate<br>sewage/GII.3/SD8508/2013/CHN   | China | Shandong | 2013 | GII.3  |
| KR107610.1 | Norovirus GII.17 isolate<br>sewage/GII.17/SD8507/2013/CHN | China | Shandong | 2013 | GII.17 |
| KR107609.1 | Norovirus GII.17 isolate<br>sewage/GII.17/SD9001/2013/CHN | China | Shandong | 2013 | GII.17 |
| KR107608.1 | Norovirus GII.17 isolate<br>sewage/GII.17/SD8905/2013/CHN | China | Shandong | 2013 | GII.17 |
| KR107607.1 | Norovirus GII.17 isolate<br>sewage/GII.17/SD8807/2013/CHN | China | Shandong | 2013 | GII.17 |
| KR107606.1 | Norovirus GII.17 isolate<br>sewage/GII.17/SD8802/2013/CHN | China | Shandong | 2013 | GII.17 |
| KR107605.1 | Norovirus GII.17 isolate<br>sewage/GII.17/SD8801/2013/CHN | China | Shandong | 2013 | GII.17 |
| KR107604.1 | Norovirus GII.17 isolate<br>sewage/GII.17/SD8704/2013/CHN | China | Shandong | 2013 | GII.17 |
| KR107603.1 | Norovirus GII.17 isolate<br>sewage/GII.17/SD8609/2013/CHN | China | Shandong | 2013 | GII.17 |
| KR107602.1 | Norovirus GII.17 isolate<br>sewage/GII.17/SD8607/2013/CHN | China | Shandong | 2013 | GII.17 |
| KR107601.1 | Norovirus GII.17 isolate<br>sewage/GII.17/SD8603/2013/CHN | China | Shandong | 2013 | GII.17 |
| KR107600.1 | Norovirus GII.17 isolate<br>sewage/GII.17/SD8501/2013/CHN | China | Shandong | 2013 | GII.17 |
| KR107599.1 | Norovirus GII.17 isolate<br>sewage/GII.17/SD8303/2013/CHN | China | Shandong | 2013 | GII.17 |
| KR107598.1 | Norovirus GII.17 isolate<br>sewage/GII.17/SD8005/2013/CHN | China | Shandong | 2013 | GII.17 |
| KR107597.1 | Norovirus GII.17 isolate<br>sewage/GII.17/SD2807/2013/CHN | China | Shandong | 2013 | GII.17 |
| KR107596.1 | Norovirus GII.17 isolate<br>sewage/GII.17/SD2806/2013/CHN | China | Shandong | 2013 | GII.17 |
| KR107595.1 | Norovirus GII.17 isolate<br>sewage/GII.17/SD2805/2013/CHN | China | Shandong | 2013 | GII.17 |
| KR107594.1 | Norovirus GII.17 isolate<br>sewage/GII.17/SD2801/2013/CHN | China | Shandong | 2013 | GII.17 |
| KR107593.1 | Norovirus GII.17 isolate<br>sewage/GII.17/SD2609/2013/CHN | China | Shandong | 2013 | GII.17 |

Table S1. Cont.

|            |                                                           |       |          |      |        |
|------------|-----------------------------------------------------------|-------|----------|------|--------|
| KR107592.1 | Norovirus GII.17 isolate<br>sewage/GII.17/SD2504/2013/CHN | China | Shandong | 2013 | GII.17 |
| KR107591.1 | Norovirus GII.17 isolate<br>sewage/GII.17/SD2408/2013/CHN | China | Shandong | 2013 | GII.17 |
| KR107590.1 | Norovirus GII.17 isolate<br>sewage/GII.17/SD2403/2013/CHN | China | Shandong | 2013 | GII.17 |
| KR107589.1 | Norovirus GII.17 isolate<br>sewage/GII.17/SD2401/2013/CHN | China | Shandong | 2013 | GII.17 |
| KR107588.1 | Norovirus GII.17 isolate<br>sewage/GII.17/SD1809/2013/CHN | China | Shandong | 2013 | GII.17 |
| KR107587.1 | Norovirus GII.17 isolate<br>sewage/GII.17/SD1802/2013/CHN | China | Shandong | 2013 | GII.17 |
| KR107586.1 | Norovirus GII.17 isolate<br>sewage/GII.17/SD1606/2013/CHN | China | Shandong | 2013 | GII.17 |
| KR107585.1 | Norovirus GII.4 isolate<br>sewage/GII.4/SD2904/2013/CHN   | China | Shandong | 2013 | GII.4  |
| KR107584.1 | Norovirus GII.4 isolate<br>sewage/GII.4/SD8906/2013/CHN   | China | Shandong | 2013 | GII.4  |
| KR107583.1 | Norovirus GII.4 isolate<br>sewage/GII.4/SD8702/2013/CHN   | China | Shandong | 2013 | GII.4  |
| KR107582.1 | Norovirus GII.4 isolate<br>sewage/GII.4/SD8410/2013/CHN   | China | Shandong | 2013 | GII.4  |
| KR107581.1 | Norovirus GII.4 isolate<br>sewage/GII.4/SD8409/2013/CHN   | China | Shandong | 2013 | GII.4  |
| KR107580.1 | Norovirus GII.4 isolate<br>sewage/GII.4/SD8408/2013/CHN   | China | Shandong | 2013 | GII.4  |
| KR107579.1 | Norovirus GII.4 isolate<br>sewage/GII.4/SD8407/2013/CHN   | China | Shandong | 2013 | GII.4  |
| KR107578.1 | Norovirus GII.4 isolate<br>sewage/GII.4/SD8401/2013/CHN   | China | Shandong | 2013 | GII.4  |
| KR107577.1 | Norovirus GII.4 isolate<br>sewage/GII.4/SD8307/2013/CHN   | China | Shandong | 2013 | GII.4  |
| KR107576.1 | Norovirus GII.4 isolate<br>sewage/GII.4/SD8305/2013/CHN   | China | Shandong | 2013 | GII.4  |
| KR107575.1 | Norovirus GII.4 isolate<br>sewage/GII.4/SD8304/2013/CHN   | China | Shandong | 2013 | GII.4  |
| KR107574.1 | Norovirus GII.4 isolate<br>sewage/GII.4/SD8205/2013/CHN   | China | Shandong | 2013 | GII.4  |
| KR107573.1 | Norovirus GII.4 isolate<br>sewage/GII.4/SD8204/2013/CHN   | China | Shandong | 2013 | GII.4  |
| KR107572.1 | Norovirus GII.4 isolate<br>sewage/GII.4/SD8110/2013/CHN   | China | Shandong | 2013 | GII.4  |
| KR107571.1 | Norovirus GII.4 isolate<br>sewage/GII.4/SD8104/2013/CHN   | China | Shandong | 2013 | GII.4  |
| KR107570.1 | Norovirus GII.4 isolate<br>sewage/GII.4/SD8008/2013/CHN   | China | Shandong | 2013 | GII.4  |

Table S1. Cont.

|            |                                                                  |       |           |      |       |
|------------|------------------------------------------------------------------|-------|-----------|------|-------|
| KR107569.1 | Norovirus GII.4 isolate<br>sewage/GII.4/SD8001/2013/CHN          | China | Shandong  | 2013 | GII.4 |
| KR107568.1 | Norovirus GII.4 isolate<br>sewage/GII.4/SD3009/2013/CHN          | China | Shandong  | 2013 | GII.4 |
| KR107567.1 | Norovirus GII.4 isolate<br>sewage/GII.4/SD2906/2013/CHN          | China | Shandong  | 2013 | GII.4 |
| KR107566.1 | Norovirus GII.4 isolate<br>sewage/GII.4/SD2804/2013/CHN          | China | Shandong  | 2013 | GII.4 |
| KR107565.1 | Norovirus GII.4 isolate<br>sewage/GII.4/SD2703/2013/CHN          | China | Shandong  | 2013 | GII.4 |
| KR107564.1 | Norovirus GII.4 isolate<br>sewage/GII.4/SD1603/2013/CHN          | China | Shandong  | 2013 | GII.4 |
| KR107563.1 | Norovirus GII.4 isolate<br>sewage/GII.4/SD2106/2013/CHN          | China | Shandong  | 2013 | GII.4 |
| KR107562.1 | Norovirus GII.4 isolate<br>sewage/GII.4/SD2007/2013/CHN          | China | Shandong  | 2013 | GII.4 |
| KR107561.1 | Norovirus GII.4 isolate<br>sewage/GII.4/SD1903/2013/CHN          | China | Shandong  | 2013 | GII.4 |
| KR107560.1 | Norovirus GII.4 isolate<br>sewage/GII.4/SD1705/2013/CHN          | China | Shandong  | 2013 | GII.4 |
| KR107559.1 | Norovirus GII.4 isolate<br>sewage/GII.4/SD1609/2013/CHN          | China | Shandong  | 2013 | GII.4 |
| KR107558.1 | Norovirus GII.4 isolate<br>sewage/GII.4/SD1601/2013/CHN          | China | Shandong  | 2013 | GII.4 |
| KM114291.1 | Norovirus<br>Hu/GII.4/SJTUH1/CHN/2014                            | China | Shanghai  | 2014 | GII.4 |
| KP241915.1 | Norovirus GII.4 isolate<br>GII/Hu/HKG/2014/GII.4/CUHK-<br>NS-454 | China | Hong Kong | 2014 | GII.4 |
| KP241914.1 | Norovirus GII.4 isolate<br>GII/Hu/HKG/2014/GII.4/CUHK-<br>NS-453 | China | Hong Kong | 2014 | GII.4 |
| KP241913.1 | Norovirus GII.4 isolate<br>GII/Hu/HKG/2014/GII.4/CUHK-<br>NS-451 | China | Hong Kong | 2014 | GII.4 |
| KP241912.1 | Norovirus GII.4 isolate<br>GII/Hu/HKG/2014/GII.4/CUHK-<br>NS-448 | China | Hong Kong | 2014 | GII.4 |
| KP241911.1 | Norovirus GII.4 isolate<br>GII/Hu/HKG/2014/GII.4/CUHK-<br>NS-445 | China | Hong Kong | 2014 | GII.4 |
| KP241910.1 | Norovirus GII.4 isolate<br>GII/Hu/HKG/2014/GII.4/CUHK-<br>NS-444 | China | Hong Kong | 2014 | GII.4 |

Table S1. Cont.

|            |                                   |       |           |      |       |  |
|------------|-----------------------------------|-------|-----------|------|-------|--|
|            | Norovirus GII.4 isolate           |       |           |      |       |  |
| KP241909.1 | GII/Hu/HKG/2014/GII.4/CUHK-NS-443 | China | Hong Kong | 2014 | GII.4 |  |
|            | Norovirus GII.4 isolate           |       |           |      |       |  |
| KP241908.1 | GII/Hu/HKG/2014/GII.4/CUHK-NS-440 | China | Hong Kong | 2014 | GII.4 |  |
|            | Norovirus GII.4 isolate           |       |           |      |       |  |
| KP241907.1 | GII/Hu/HKG/2014/GII.4/CUHK-NS-439 | China | Hong Kong | 2014 | GII.4 |  |
|            | Norovirus GII.4 isolate           |       |           |      |       |  |
| KP241906.1 | GII/Hu/HKG/2014/GII.4/CUHK-NS-437 | China | Hong Kong | 2014 | GII.4 |  |
|            | Norovirus GII.4 isolate           |       |           |      |       |  |
| KP241905.1 | GII/Hu/HKG/2014/GII.4/CUHK-NS-436 | China | Hong Kong | 2014 | GII.4 |  |
|            | Norovirus                         |       |           |      |       |  |
| KP176412.1 | Hu/GII/HKG/2014/GII.4/CUHK-NS-435 | China | Hong Kong | 2014 | GII.4 |  |
|            | Norovirus                         |       |           |      |       |  |
| KP176411.1 | Hu/GII/HKG/2014/GII.4/CUHK-NS-433 | China | Hong Kong | 2014 | GII.4 |  |
|            | Norovirus                         |       |           |      |       |  |
| KP176410.1 | Hu/GII/HKG/2014/GII.4/CUHK-NS-431 | China | Hong Kong | 2014 | GII.4 |  |
|            | Norovirus                         |       |           |      |       |  |
| KP176409.1 | Hu/GII/HKG/2014/GII.4/CUHK-NS-430 | China | Hong Kong | 2014 | GII.4 |  |
|            | Norovirus                         |       |           |      |       |  |
| KP176408.1 | Hu/GII/HKG/2014/GII.4/CUHK-NS-429 | China | Hong Kong | 2014 | GII.4 |  |
|            | Norovirus                         |       |           |      |       |  |
| KP176407.1 | Hu/GII/HKG/2014/GII.4/CUHK-NS-421 | China | Hong Kong | 2014 | GII.4 |  |
|            | Norovirus                         |       |           |      |       |  |
| KP176406.1 | Hu/GII/HKG/2014/GII.4/CUHK-NS-420 | China | Hong Kong | 2014 | GII.4 |  |
|            | Norovirus                         |       |           |      |       |  |
| KP176405.1 | Hu/GII/HKG/2014/GII.4/CUHK-NS-418 | China | Hong Kong | 2014 | GII.4 |  |
|            | Norovirus                         |       |           |      |       |  |
| KP176404.1 | Hu/GII/HKG/2014/GII.4/CUHK-NS-417 | China | Hong Kong | 2014 | GII.4 |  |
|            | Norovirus                         |       |           |      |       |  |
| KP176403.1 | Hu/GII/HKG/2014/GII.4/CUHK-NS-416 | China | Hong Kong | 2014 | GII.4 |  |

Table S1. Cont.

|            |                                   |       |           |      |       |  |
|------------|-----------------------------------|-------|-----------|------|-------|--|
|            | Norovirus                         |       |           |      |       |  |
| KP176402.1 | Hu/GII/HKG/2014/GII.4/CUHK-NS-415 | China | Hong Kong | 2014 | GII.4 |  |
|            | Norovirus                         |       |           |      |       |  |
| KP176401.1 | Hu/GII/HKG/2014/GII.4/CUHK-NS-412 | China | Hong Kong | 2014 | GII.4 |  |
|            | Norovirus                         |       |           |      |       |  |
| KP176400.1 | Hu/GII/HKG/2014/GII.4/CUHK-NS-407 | China | Hong Kong | 2014 | GII.4 |  |
|            | Norovirus                         |       |           |      |       |  |
| KP176399.1 | Hu/GII/HKG/2014/GII.4/CUHK-NS-379 | China | Hong Kong | 2014 | GII.4 |  |
|            | Norovirus                         |       |           |      |       |  |
| KP176398.1 | Hu/GII/HKG/2014/GII.4/CUHK-NS-376 | China | Hong Kong | 2014 | GII.4 |  |
|            | Norovirus                         |       |           |      |       |  |
| KP176397.1 | Hu/GII/HKG/2014/GII.4/CUHK-NS-371 | China | Hong Kong | 2014 | GII.4 |  |
|            | Norovirus                         |       |           |      |       |  |
| KP176396.1 | Hu/GII/HKG/2014/GII.4/CUHK-NS-356 | China | Hong Kong | 2014 | GII.4 |  |
|            | Norovirus                         |       |           |      |       |  |
| KP176395.1 | Hu/GII/HKG/2014/GII.4/CUHK-NS-352 | China | Hong Kong | 2014 | GII.4 |  |
|            | Norovirus                         |       |           |      |       |  |
| KP176394.1 | Hu/GII/HKG/2014/GII.4/CUHK-NS-346 | China | Hong Kong | 2014 | GII.4 |  |
|            | Norovirus                         |       |           |      |       |  |
| KP176393.1 | Hu/GII/HKG/2014/GII.4/CUHK-NS-341 | China | Hong Kong | 2014 | GII.4 |  |
|            | Norovirus                         |       |           |      |       |  |
| KP123606.1 | Hu/GII/HKG/2014/GII.4/CUHK-NS-426 | China | Hong Kong | 2014 | GII.4 |  |
|            | Norovirus                         |       |           |      |       |  |
| KP096348.1 | Hu/GII/HKG/2014/GII.4/CUHK-NS-406 | China | Hong Kong | 2014 | GII.4 |  |
|            | Norovirus                         |       |           |      |       |  |
| KP096347.1 | Hu/GII/HKG/2014/GII.4/CUHK-NS-404 | China | Hong Kong | 2014 | GII.4 |  |
|            | Norovirus                         |       |           |      |       |  |
| KP096346.1 | Hu/GII/HKG/2014/GII.4/CUHK-NS-402 | China | Hong Kong | 2014 | GII.4 |  |
|            | Norovirus                         |       |           |      |       |  |
| KP096345.1 | Hu/GII/HKG/2014/GII.4/CUHK-NS-399 | China | Hong Kong | 2014 | GII.4 |  |

Table S1. Cont.

|            |                                   |       |           |      |       |  |
|------------|-----------------------------------|-------|-----------|------|-------|--|
|            | Norovirus                         |       |           |      |       |  |
| KP096344.1 | Hu/GII/HKG/2014/GII.4/CUHK-NS-398 | China | Hong Kong | 2014 | GII.4 |  |
|            | Norovirus                         |       |           |      |       |  |
| KP096343.1 | Hu/GII/HKG/2014/GII.4/CUHK-NS-397 | China | Hong Kong | 2014 | GII.4 |  |
|            | Norovirus                         |       |           |      |       |  |
| KP096342.1 | Hu/GII/HKG/2014/GII.4/CUHK-NS-396 | China | Hong Kong | 2014 | GII.4 |  |
|            | Norovirus                         |       |           |      |       |  |
| KP096341.1 | Hu/GII/HKG/2014/GII.4/CUHK-NS-395 | China | Hong Kong | 2014 | GII.4 |  |
|            | Norovirus                         |       |           |      |       |  |
| KP096340.1 | Hu/GII/HKG/2014/GII.4/CUHK-NS-394 | China | Hong Kong | 2014 | GII.4 |  |
|            | Norovirus                         |       |           |      |       |  |
| KP096339.1 | Hu/GII/HKG/2014/GII.4/CUHK-NS-393 | China | Hong Kong | 2014 | GII.4 |  |
|            | Norovirus                         |       |           |      |       |  |
| KP096338.1 | Hu/GII/HKG/2014/GII.4/CUHK-NS-389 | China | Hong Kong | 2014 | GII.4 |  |
|            | Norovirus                         |       |           |      |       |  |
| KP096337.1 | Hu/GII/HKG/2014/GII.4/CUHK-NS-387 | China | Hong Kong | 2014 | GII.4 |  |
|            | Norovirus                         |       |           |      |       |  |
| KP096336.1 | Hu/GII/HKG/2014/GII.4/CUHK-NS-386 | China | Hong Kong | 2014 | GII.4 |  |
|            | Norovirus                         |       |           |      |       |  |
| KP096335.1 | Hu/GII/HKG/2014/GII.4/CUHK-NS-385 | China | Hong Kong | 2014 | GII.4 |  |
|            | Norovirus                         |       |           |      |       |  |
| KP096334.1 | Hu/GII/HKG/2014/GII.4/CUHK-NS-384 | China | Hong Kong | 2014 | GII.4 |  |
|            | Norovirus                         |       |           |      |       |  |
| KP096333.1 | Hu/GII/HKG/2014/GII.4/CUHK-NS-383 | China | Hong Kong | 2014 | GII.4 |  |
|            | Norovirus                         |       |           |      |       |  |
| KP096332.1 | Hu/GII/HKG/2014/GII.4/CUHK-NS-380 | China | Hong Kong | 2014 | GII.4 |  |
|            | Norovirus                         |       |           |      |       |  |
| KP096331.1 | Hu/GII/HKG/2014/GII.4/CUHK-NS-378 | China | Hong Kong | 2014 | GII.4 |  |
|            | Norovirus                         |       |           |      |       |  |
| KP096330.1 | Hu/GII/HKG/2014/GII.4/CUHK-NS-377 | China | Hong Kong | 2014 | GII.4 |  |

Table S1. Cont.

|            |                                                |       |           |      |       |  |
|------------|------------------------------------------------|-------|-----------|------|-------|--|
|            | Norovirus                                      |       |           |      |       |  |
| KP096329.1 | Hu/GII/HKG/2014/GII.4/CUHK-NS-374              | China | Hong Kong | 2014 | GII.4 |  |
|            | Norovirus                                      |       |           |      |       |  |
| KP096328.1 | Hu/GII/HKG/2014/GII.4/CUHK-NS-372              | China | Hong Kong | 2014 | GII.4 |  |
|            | Norovirus                                      |       |           |      |       |  |
| KP096327.1 | Hu/GII/HKG/2014/GII.4/CUHK-NS-368              | China | Hong Kong | 2014 | GII.4 |  |
| HM802555.1 | Norovirus Hu/GII.4/Hong Kong/CU050130/2005/CHN | China | Hong Kong | 2005 | GII.4 |  |
| HM802554.1 | Norovirus Hu/GII.4/Hong Kong/CU051120/2005/CHN | China | Hong Kong | 2005 | GII.4 |  |
| HM802553.1 | Norovirus Hu/GII.4/Hong Kong/CU051013/2005/CHN | China | Hong Kong | 2005 | GII.4 |  |
| HM802552.1 | Norovirus Hu/GII.4/Hong Kong/CU050852/2005/CHN | China | Hong Kong | 2005 | GII.4 |  |
| HM802551.1 | Norovirus Hu/GII.4/Hong Kong/CU041222/2004/CHN | China | Hong Kong | 2004 | GII.4 |  |
| HM802550.1 | Norovirus Hu/GII.4/Hong Kong/CU050152/2005/CHN | China | Hong Kong | 2005 | GII.4 |  |
| HM802549.1 | Norovirus Hu/GII.4/Hong Kong/CU050136/2005/CHN | China | Hong Kong | 2005 | GII.4 |  |
| HM802548.1 | Norovirus Hu/GII.4/Hong Kong/CU050128/2005/CHN | China | Hong Kong | 2005 | GII.4 |  |
| HM802547.1 | Norovirus Hu/GII.4/Hong Kong/CU041225/2004/CHN | China | Hong Kong | 2004 | GII.4 |  |
| HM802546.1 | Norovirus Hu/GII.4/Hong Kong/CU041206/2004/CHN | China | Hong Kong | 2004 | GII.4 |  |
| HM802545.1 | Norovirus Hu/GII.4/Hong Kong/CU050431/2005/CHN | China | Hong Kong | 2005 | GII.4 |  |
| HM802544.1 | Norovirus Hu/GII.4/Hong Kong/CU051146/2005/CHN | China | Hong Kong | 2005 | GII.4 |  |
| HM802543.1 | Norovirus Hu/GII.4/Hong Kong/CU050106/2005/CHN | China | Hong Kong | 2005 | GII.4 |  |
| HM802542.1 | Norovirus Hu/GII.4/Hong Kong/CU050140/2005/CHN | China | Hong Kong | 2005 | GII.4 |  |
| HM802541.1 | Norovirus Hu/GII.4/Hong Kong/CU041213/2004/CHN | China | Hong Kong | 2004 | GII.4 |  |
| HM802540.1 | Norovirus Hu/GII.4/Hong Kong/CU050141/2005/CHN | China | Hong Kong | 2005 | GII.4 |  |
| HM802539.1 | Norovirus Hu/GII.4/Hong Kong/CU060025/2006/CHN | China | Hong Kong | 2006 | GII.4 |  |
| HM802538.1 | Norovirus Hu/GII.4/Hong Kong/CU060024/2006/CHN | China | Hong Kong | 2006 | GII.4 |  |



Table S1. Cont.

|            |                                                        |       |           |      |             |
|------------|--------------------------------------------------------|-------|-----------|------|-------------|
| HM802537.1 | Norovirus Hu/GII.4/Hong Kong/CU060014/2006/CHN         | China | Hong Kong | 2006 | GII.4       |
| HM802536.1 | Norovirus Hu/GII.4/Hong Kong/CU060039/2006/CHN         | China | Hong Kong | 2006 | GII.4       |
| HM802535.1 | Norovirus Hu/GII.4/Hong Kong/CU060001/2006/CHN         | China | Hong Kong | 2006 | GII.4       |
| HM802534.1 | Norovirus Hu/GII.4/Hong Kong/CU060031/2006/CHN         | China | Hong Kong | 2006 | GII.4       |
| HM802533.1 | Norovirus Hu/GII.4/Hong Kong/CU060037/2006/CHN         | China | Hong Kong | 2006 | GII.4       |
| HM802532.1 | Norovirus Hu/GII.4/Hong Kong/CU060030/2006/CHN         | China | Hong Kong | 2006 | GII.4       |
| HM802531.1 | Norovirus Hu/GII.4/Hong Kong/CU060026/2006/CHN         | China | Hong Kong | 2006 | GII.4       |
| HM802530.1 | Norovirus Hu/GII.4/Hong Kong/CU060028/2006/CHN         | China | Hong Kong | 2006 | GII.4       |
| HM802529.1 | Norovirus Hu/GII.4/Hong Kong/CU060009/2006/CHN         | China | Hong Kong | 2006 | GII.4       |
| HM802528.1 | Norovirus Hu/GII.4/Hong Kong/CU060036/2006/CHN         | China | Hong Kong | 2006 | GII.4       |
| HM802527.1 | Norovirus Hu/GII.4/Hong Kong/CU060012/2006/CHN         | China | Hong Kong | 2006 | GII.4       |
| HM802526.1 | Norovirus Hu/GII.4/Hong Kong/CU060027/2006/CHN         | China | Hong Kong | 2006 | GII.4       |
| HM802525.1 | Norovirus Hu/GII.4/Hong Kong/CU060011/2006/CHN         | China | Hong Kong | 2006 | GII.4       |
| GU991353.1 | Norovirus Hu/GII/Shanghai/SH2/2008/CHN                 | China | Shanghai  | 2008 | GII         |
| KT380915.1 | Norovirus GII.17 strain Hu/GII.17/142700/Shanghai/2014 | China | Shanghai  | 2014 | GII.17      |
| KC175323.1 | Norovirus Hu/GII.4/Hong Kong/CUHK3630/2012/CHN         | China | Hong Kong | 2012 | GII.4       |
| KJ145855.1 | Norovirus Hu/GII.4-2006b/SH1242/2011                   | China | Shanghai  | 2011 | GII.4-2006b |
| KJ145854.1 | Norovirus Hu/GII.3/SH1235/2011/China                   | China | Shanghai  | 2011 | GII.3       |
| KJ145853.1 | Norovirus Hu/GII.4-2010/SH0809/2011/China              | China | Shanghai  | 2011 | GII.4       |
| KJ145852.1 | Norovirus Hu/GII.6/SH0331/2011/China                   | China | Shanghai  | 2011 | GII.6       |
| KJ145851.1 | Norovirus Hu/GII.7/SH0258/2011/China                   | China | Shanghai  | 2011 | GII.7       |
| KJ145850.1 | Norovirus Hu/GII.2/SH0140/2011/China                   | China | Shanghai  | 2011 | GII.2       |
| KJ145849.1 | Norovirus Hu/GII.2/SH0106/2011/China                   | China | Shanghai  | 2011 | GII.2       |

Table S1. Cont.

|            |                                                         |       |           |      |             |
|------------|---------------------------------------------------------|-------|-----------|------|-------------|
| KJ145848.1 | Norovirus Hu/GII.4-2006b/SH0807/2010/China              | China | Shanghai  | 2010 | GII.4-2006b |
| KJ145847.1 | Norovirus Hu/GII.4-2010/SH0632/2010/China               | China | Shanghai  | 2010 | GII.4       |
| KT149176.1 | Norovirus GII isolate Hu/Guangzhou/GZ2015-L362/CHN/2015 | China | Guangdong | 2015 | GII         |
| KT149175.1 | Norovirus GII isolate Hu/Guangzhou/GZ2015-L343/CHN/2015 | China | Guangdong | 2015 | GII         |
| KT149174.1 | Norovirus GII isolate Hu/Guangzhou/GZ2015-L340/CHN/2015 | China | Guangdong | 2015 | GII         |
| KT149173.1 | Norovirus GII isolate Hu/Guangzhou/GZ2015-L339/CHN/2015 | China | Guangdong | 2015 | GII         |
| KT149172.1 | Norovirus GII isolate Hu/Guangzhou/GZ2015-L337/CHN/2015 | China | Guangdong | 2015 | GII         |
| KT149171.1 | Norovirus GII isolate Hu/Guangzhou/GZ2015-L325/CHN/2015 | China | Guangdong | 2015 | GII         |
| KT149170.1 | Norovirus GII isolate Hu/Guangzhou/GZ2015-L324/CHN/2015 | China | Guangdong | 2015 | GII         |
| KT149169.1 | Norovirus GII isolate Hu/Guangzhou/GZ2014-L313/CHN/2014 | China | Guangdong | 2014 | GII         |
| KT149168.1 | Norovirus GII isolate Hu/Guangzhou/GZ2014-L311/CHN/2014 | China | Guangdong | 2014 | GII         |
| KP864144.1 | Norovirus GII.17 strain GII.17/152606/Shanghai/2015/CHN | China | Shanghai  | 2015 | GII.17      |
| KP864143.1 | Norovirus GII.17 strain GII.17/152705/Shanghai/2015/CHN | China | Shanghai  | 2015 | GII.17      |
| KP864142.1 | Norovirus GII.17 strain GII.17/152701/Shanghai/2015/CHN | China | Shanghai  | 2015 | GII.17      |
| KP864141.1 | Norovirus GII.17 strain GII.17/152625/Shanghai/2015/CHN | China | Shanghai  | 2015 | GII.17      |
| KP864140.1 | Norovirus GII.17 strain GII.17/152623/Shanghai/2015/CHN | China | Shanghai  | 2015 | GII.17      |
| KP864139.1 | Norovirus GII.17 strain GII.17/152620/Shanghai/2015/CHN | China | Shanghai  | 2015 | GII.17      |
| KP864138.1 | Norovirus GII.17 strain GII.17/152618/Shanghai/2015/CHN | China | Shanghai  | 2015 | GII.17      |

Table S1. Cont.

|            |                                                            |       |          |      |        |
|------------|------------------------------------------------------------|-------|----------|------|--------|
| KP864137.1 | Norovirus GII.17 strain<br>GII.17/142668/Shanghai/2014/CHN | China | Shanghai | 2014 | GII.17 |
| KP864136.1 | Norovirus GII.17 strain<br>GII.17/142687/Shanghai/2014/CHN | China | Shanghai | 2014 | GII.17 |
| KP864135.1 | Norovirus GII.17 strain<br>GII.17/142685/Shanghai/2014/CHN | China | Shanghai | 2014 | GII.17 |
| KP864134.1 | Norovirus GII.17 strain<br>GII.17/142684/Shanghai/2014/CHN | China | Shanghai | 2014 | GII.17 |
| KP864133.1 | Norovirus GII.17 strain<br>GII.17/142589/Shanghai/2014/CHN | China | Shanghai | 2014 | GII.17 |
| KP864132.1 | Norovirus GII.17 strain<br>GII.17/152639/Shanghai/2015/CHN | China | Shanghai | 2015 | GII.17 |
| KP864131.1 | Norovirus GII.17 strain<br>GII.17/152632/Shanghai/2015/CHN | China | Shanghai | 2015 | GII.17 |
| KP864130.1 | Norovirus GII.17 strain<br>GII.17/152652/Shanghai/2015/CHN | China | Shanghai | 2015 | GII.17 |
| KP864129.1 | Norovirus GII.17 strain<br>GII.17/152645/Shanghai/2015/CHN | China | Shanghai | 2015 | GII.17 |
| KP864128.1 | Norovirus GII.17 strain<br>GII.17/142663/Shanghai/2014/CHN | China | Shanghai | 2014 | GII.17 |
| KP864127.1 | Norovirus GII.17 strain<br>GII.17/142662/Shanghai/2014/CHN | China | Shanghai | 2014 | GII.17 |
| KP864126.1 | Norovirus GII.17 strain<br>GII.17/142666/Shanghai/2014/CHN | China | Shanghai | 2014 | GII.17 |
| KP864125.1 | Norovirus GII.4 strain<br>GII.4/152707/Shanghai/2015/CHN   | China | Shanghai | 2015 | GII.4  |
| KP864124.1 | Norovirus GII.4 strain<br>GII.4/152702/Shanghai/2015/CHN   | China | Shanghai | 2015 | GII.4  |
| KP864123.1 | Norovirus GII.4 strain<br>GII.4/152631/Shanghai/2015/CHN   | China | Shanghai | 2015 | GII.4  |
| KP864122.1 | Norovirus GII.4 strain<br>GII.4/152635/Shanghai/2015/CHN   | China | Shanghai | 2015 | GII.4  |
| KP864121.1 | Norovirus GII.4 strain<br>GII.4/152664/Shanghai/2015/CHN   | China | Shanghai | 2015 | GII.4  |
| KP864120.1 | Norovirus GII.4 strain<br>GII.4/152643/Shanghai/2015/CHN   | China | Shanghai | 2015 | GII.4  |
| KP864119.1 | Norovirus GII.4 strain<br>GII.4/142669/Shanghai/2014/CHN   | China | Shanghai | 2014 | GII.4  |
| KP864118.1 | Norovirus GII.4 strain<br>GII.4/142651/Shanghai/2014/CHN   | China | Shanghai | 2014 | GII.4  |
| KP864117.1 | Norovirus GII.4 strain<br>GII.4/142690/Shanghai/2014/CHN   | China | Shanghai | 2014 | GII.4  |
| KP864116.1 | Norovirus GII.4 strain<br>GII.4/142674/Shanghai/2014/CHN   | China | Shanghai | 2014 | GII.4  |
| KP864115.1 | Norovirus GII.4 strain<br>GII.4/142683/Shanghai/2014/CHN   | China | Shanghai | 2014 | GII.4  |

Table S1. Cont.

|            |                                                            |       |          |      |        |
|------------|------------------------------------------------------------|-------|----------|------|--------|
| KP864114.1 | Norovirus GII.4 strain<br>GII.4/142584/Shanghai/2014/CHN   | China | Shanghai | 2014 | GII.4  |
| KP864113.1 | Norovirus GII.4 strain<br>GII.4/142597/Shanghai/2014/CHN   | China | Shanghai | 2014 | GII.4  |
| KP864112.1 | Norovirus GII.4 strain<br>GII.4/141967/Shanghai/2014/CHN   | China | Shanghai | 2014 | GII.4  |
| KP864111.1 | Norovirus GII.4 strain<br>GII.4/141784/Shanghai/2014/CHN   | China | Shanghai | 2014 | GII.4  |
| KP864110.1 | Norovirus GII.13 strain<br>GII.13/152709/Shanghai/2015/CHN | China | Shanghai | 2015 | GII.13 |
| KP864109.1 | Norovirus GII.6 strain<br>GII.6/142665/Shanghai/2014/CHN   | China | Shanghai | 2014 | GII.6  |
| KP864108.1 | Norovirus GII.2 strain<br>GII.2/142558/Shanghai/2014/CHN   | China | Shanghai | 2014 | GII.2  |
| KP864107.1 | Norovirus GII.4 strain<br>GII.4/152624/Shanghai/2015/CHN   | China | Shanghai | 2015 | GII.4  |
| KP864106.1 | Norovirus GII.4 strain<br>GII.4/142681/Shanghai/2014/CHN   | China | Shanghai | 2014 | GII.4  |
| KP864105.1 | Norovirus GII.4 strain<br>GII.4/142696/Shanghai/2014/CHN   | China | Shanghai | 2014 | GII.4  |
| JX427601.1 | Norovirus<br>Hu/GII.4/NV396/China/2010                     | China | Guizhou  | 2010 | GII.4  |
| JX427600.1 | Norovirus<br>Hu/GII.4/NV384/China/2010                     | China | Guizhou  | 2010 | GII.4  |
| JX427599.1 | Norovirus<br>Hu/GII.4/NV387/China/2010                     | China | Guizhou  | 2010 | GII.4  |
| JX427598.1 | Norovirus<br>Hu/GII.4/NV382/China/2010                     | China | Guizhou  | 2010 | GII.4  |
| JX427597.1 | Norovirus<br>Hu/GII.4/NV378/China/2010                     | China | Guizhou  | 2010 | GII.4  |
| JX427596.1 | Norovirus<br>Hu/GII.4/NV360/China/2010                     | China | Guizhou  | 2010 | GII.4  |
| JX427595.1 | Norovirus<br>Hu/GII.4/NV327/China/2010                     | China | Guizhou  | 2010 | GII.4  |
| JX427594.1 | Norovirus<br>Hu/GII.4/NV354/China/2010                     | China | Guizhou  | 2010 | GII.4  |
| JX427593.1 | Norovirus<br>Hu/GII.4/NV350/China/2010                     | China | Guizhou  | 2010 | GII.4  |
| JX427592.1 | Norovirus<br>Hu/GII.4/NV320/China/2010                     | China | Guizhou  | 2010 | GII.4  |
| JX427591.1 | Norovirus<br>Hu/GII.4/NV311/China/2010                     | China | Guizhou  | 2010 | GII.4  |
| JX427590.1 | Norovirus<br>Hu/GII.4/NV307/China/2010                     | China | Guizhou  | 2010 | GII.4  |
| JX427589.1 | Norovirus<br>Hu/GII.4/NV295/China/2010                     | China | Guizhou  | 2010 | GII.4  |

Table S1. Cont.

|            |                                        |       |         |      |       |
|------------|----------------------------------------|-------|---------|------|-------|
| JX427588.1 | Norovirus<br>Hu/GII.4/NV281/China/2010 | China | Guizhou | 2010 | GII.4 |
| JX427587.1 | Norovirus<br>Hu/GII.4/NV277/China/2010 | China | Guizhou | 2010 | GII.4 |
| JX427586.1 | Norovirus<br>Hu/GII.4/NV216/China/2010 | China | Guizhou | 2010 | GII.4 |
| JX427585.1 | Norovirus<br>Hu/GII.4/NV211/China/2010 | China | Guizhou | 2010 | GII.4 |
| JX427584.1 | Norovirus<br>Hu/GII.4/NV207/China/2010 | China | Guizhou | 2010 | GII.4 |
| JX427583.1 | Norovirus<br>Hu/GII.4/NV204/China/2010 | China | Guizhou | 2010 | GII.4 |
| JX427582.1 | Norovirus<br>Hu/GII.4/N141/China/2010  | China | Guizhou | 2010 | GII.4 |
| JX427581.1 | Norovirus<br>Hu/GII.4/NV100/China/2010 | China | Guizhou | 2010 | GII.4 |
| JX427580.1 | Norovirus<br>Hu/GII.4/NV86/China/2010  | China | Guizhou | 2010 | GII.4 |
| JX427579.1 | Norovirus<br>Hu/GII.4/NV85/China/2011  | China | Guizhou | 2011 | GII.4 |
| JX427578.1 | Norovirus<br>Hu/GII.4/NV84/China/2011  | China | Guizhou | 2011 | GII.4 |
| JX427577.1 | Norovirus<br>Hu/GII.4/NV79/China/2011  | China | Guizhou | 2011 | GII.4 |
| JX427576.1 | Norovirus<br>Hu/GII.4/NV65/China/2010  | China | Guizhou | 2010 | GII.4 |
| JX427575.1 | Norovirus<br>Hu/GII.4/NV64/China/2010  | China | Guizhou | 2010 | GII.4 |
| JX427574.1 | Norovirus<br>Hu/GII.4/NV62/China/2010  | China | Guizhou | 2010 | GII.4 |
| JX427573.1 | Norovirus<br>Hu/GII.4/NV60/China/2010  | China | Guizhou | 2010 | GII.4 |
| JX427572.1 | Norovirus<br>Hu/GII.4/NV58/China/2010  | China | Guizhou | 2010 | GII.4 |
| JX427571.1 | Norovirus<br>Hu/GII.4/NV56/China/2010  | China | Guizhou | 2010 | GII.4 |
| JX427570.1 | Norovirus<br>Hu/GII.4/NV54/China/2010  | China | Guizhou | 2010 | GII.4 |
| JX427569.1 | Norovirus<br>Hu/GII.4/NV53/China/2010  | China | Guizhou | 2010 | GII.4 |
| JX427568.1 | Norovirus<br>Hu/GII.4/NV51/China/2010  | China | Guizhou | 2010 | GII.4 |
| JX427567.1 | Norovirus<br>Hu/GII.4/NV43/China/2010  | China | Guizhou | 2010 | GII.4 |
| JX427566.1 | Norovirus<br>Hu/GII.4/NV37/China/2010  | China | Guizhou | 2010 | GII.4 |

Table S1. Cont.

|            |                                                            |       |           |      |        |
|------------|------------------------------------------------------------|-------|-----------|------|--------|
| JX427565.1 | Norovirus<br>Hu/GII.4/NV27/China/2010                      | China | Guizhou   | 2010 | GII.4  |
| JX427564.1 | Norovirus<br>Hu/GII.4/NV19/China/2010                      | China | Guizhou   | 2010 | GII.4  |
| JX427563.1 | Norovirus<br>Hu/GII.4/NV1/China/2010                       | China | Guizhou   | 2010 | GII.4  |
| KP864104.1 | Norovirus GII.17 strain<br>GII.17/142661/Shanghai/2014/CHN | China | Shanghai  | 2014 | GII.17 |
| KP864103.1 | Norovirus GII.17 strain<br>GII.17/142700/Shanghai/2014/CHN | China | Shanghai  | 2014 | GII.17 |
| KP864102.1 | Norovirus GII.17 strain<br>GII.17/152642/Shanghai/2015/CHN | China | Shanghai  | 2015 | GII.17 |
| KT033905.1 | Norovirus<br>Hu/GII.4/SPHC1183/2012/CHN                    | China | Shanghai  | 2012 | GII.4  |
| KT033904.1 | Norovirus<br>Hu/GII.4/SPHC1134/2012/CHN                    | China | Shanghai  | 2012 | GII.4  |
| KT033903.1 | Norovirus<br>Hu/GII.4/SPHC2715/2012/CHN                    | China | Shanghai  | 2012 | GII.4  |
| KT033902.1 | Norovirus<br>Hu/GII.4/SPHC2048/2012/CHN                    | China | Shanghai  | 2012 | GII.4  |
| JX984953.1 | Norovirus Hu/GII.6/GZ2010-<br>L96/Guangzhou/CHN/2011       | China | Guangdong | 2011 | GII.6  |
| JX984952.1 | Norovirus Hu/GII.4/GZ2010-<br>L91/Guangzhou/CHN/2011       | China | Guangdong | 2011 | GII.4  |
| JX984951.1 | Norovirus Hu/GII.4/GZ2010-<br>L88/Guangzhou/CHN/2011       | China | Guangdong | 2011 | GII.4  |
| JX984950.1 | Norovirus Hu/GII.4/GZ2010-<br>L87/Guangzhou/CHN/2011       | China | Guangdong | 2011 | GII.4  |
| JX984949.1 | Norovirus Hu/GII.6/GZ2010-<br>L72/Guangzhou/CHN/2010       | China | Guangdong | 2010 | GII.6  |
| JX984948.1 | Norovirus Hu/GII.3/GZ2010-<br>L63/Guangzhou/CHN/2010       | China | Guangdong | 2010 | GII.3  |
| JX984947.1 | Norovirus Hu/GII.4/GZ2010-<br>L32/Guangzhou/CHN/2010       | China | Guangdong | 2010 | GII.4  |
| JX984946.1 | Norovirus Hu/GII.4/GZ2010-<br>L26/Guangzhou/CHN/2010       | China | Guangdong | 2010 | GII.4  |
| JX984945.1 | Norovirus Hu/GII.6/GZ2010-<br>L1/Guangzhou/CHN/2010        | China | Guangdong | 2010 | GII.6  |
| AB924677.1 | Norovirus Hu/GII.4/Yunnan/31-<br>YN/2013/CHN               | China | Yunnan    | 2013 | GII.4  |
| AB924676.1 | Norovirus Hu/GII.4/Yunnan/29-<br>YN/2013/CHN               | China | Yunnan    | 2013 | GII.4  |
| AB924675.1 | Norovirus Hu/GII.4/Yunnan/28-<br>YN/2013/CHN               | China | Yunnan    | 2013 | GII.4  |
| AB924674.1 | Norovirus Hu/GII.4/Yunnan/26-<br>YN/2013/CHN               | China | Yunnan    | 2013 | GII.4  |

Table S1. Cont.

|            |                                                |       |           |      |        |
|------------|------------------------------------------------|-------|-----------|------|--------|
| AB924673.1 | Norovirus Hu/GII.4/Yunnan/25-YN/2013/CHN       | China | Yunnan    | 2013 | GII.4  |
| AB924672.1 | Norovirus Hu/GII.4/Yunnan/23-YN/2013/CHN       | China | Yunnan    | 2013 | GII.4  |
| AB924671.1 | Norovirus Hu/GII.3/Yunnan/22-YN/2013/CHN       | China | Yunnan    | 2013 | GII.3  |
| AB924670.1 | Norovirus Hu/GII.4/Yunnan/21-YN/2013/CHN       | China | Yunnan    | 2013 | GII.4  |
| AB924669.1 | Norovirus Hu/GII.3/Yunnan/20-YN/2013/CHN       | China | Yunnan    | 2013 | GII.3  |
| AB924668.1 | Norovirus Hu/GII.4/Yunnan/19-YN/2013/CHN       | China | Yunnan    | 2013 | GII.4  |
| AB924667.1 | Norovirus Hu/GII.4/Yunnan/18-YN/2013/CHN       | China | Yunnan    | 2013 | GII.4  |
| AB924666.1 | Norovirus Hu/GII.4/Yunnan/17-YN/2013/CHN       | China | Yunnan    | 2013 | GII.4  |
| KM514075.2 | Norovirus<br>GII/Hu/HKG/2014/GII.4/CUHK-NS-332 | China | Hong Kong | 2014 | GII.4  |
| KP902590.1 | Norovirus<br>Hu/GII.17/HKG/2015/CUHK-NS-575    | China | Hong Kong | 2015 | GII.17 |
| KP902589.1 | Norovirus<br>Hu/GII.17/HKG/2015/CUHK-NS-574    | China | Hong Kong | 2015 | GII.17 |
| KP902588.1 | Norovirus<br>Hu/GII.17/HKG/2015/CUHK-NS-565    | China | Hong Kong | 2015 | GII.17 |
| KP902587.1 | Norovirus<br>Hu/GII.17/HKG/2015/CUHK-NS-556    | China | Hong Kong | 2015 | GII.17 |
| KP902586.1 | Norovirus<br>Hu/GII.17/HKG/2015/CUHK-NS-549    | China | Hong Kong | 2015 | GII.17 |
| KP902585.1 | Norovirus<br>Hu/GII.17/HKG/2015/CUHK-NS-528    | China | Hong Kong | 2015 | GII.17 |
| KP902584.1 | Norovirus<br>Hu/GII.17/HKG/2015/CUHK-NS-521    | China | Hong Kong | 2015 | GII.17 |
| KP902583.1 | Norovirus<br>Hu/GII.17/HKG/2015/CUHK-NS-520    | China | Hong Kong | 2015 | GII.17 |
| KP902582.1 | Norovirus<br>Hu/GII.17/HKG/2015/CUHK-NS-517    | China | Hong Kong | 2015 | GII.17 |

Table S1. Cont.

|            |                                |       |           |      |        |  |
|------------|--------------------------------|-------|-----------|------|--------|--|
|            | Norovirus                      |       |           |      |        |  |
| KP902581.1 | Hu/GII.17/HKG/2015/CUHK-NS-514 | China | Hong Kong | 2015 | GII.17 |  |
|            | Norovirus                      |       |           |      |        |  |
| KP902580.1 | Hu/GII.17/HKG/2015/CUHK-NS-512 | China | Hong Kong | 2015 | GII.17 |  |
|            | Norovirus                      |       |           |      |        |  |
| KP902579.1 | Hu/GII.17/HKG/2015/CUHK-NS-506 | China | Hong Kong | 2015 | GII.17 |  |
|            | Norovirus                      |       |           |      |        |  |
| KP902578.1 | Hu/GII.17/HKG/2014/CUHK-NS-503 | China | Hong Kong | 2014 | GII.17 |  |
|            | Norovirus                      |       |           |      |        |  |
| KP902577.1 | Hu/GII.17/HKG/2014/CUHK-NS-502 | China | Hong Kong | 2014 | GII.17 |  |
|            | Norovirus                      |       |           |      |        |  |
| KP902576.1 | Hu/GII.17/HKG/2014/CUHK-NS-500 | China | Hong Kong | 2014 | GII.17 |  |
|            | Norovirus                      |       |           |      |        |  |
| KP902575.1 | Hu/GII.17/HKG/2014/CUHK-NS-493 | China | Hong Kong | 2014 | GII.17 |  |
|            | Norovirus                      |       |           |      |        |  |
| KP902574.1 | Hu/GII.17/HKG/2014/CUHK-NS-492 | China | Hong Kong | 2014 | GII.17 |  |
|            | Norovirus                      |       |           |      |        |  |
| KP902573.1 | Hu/GII.17/HKG/2014/CUHK-NS-483 | China | Hong Kong | 2014 | GII.17 |  |
|            | Norovirus                      |       |           |      |        |  |
| KP902572.1 | Hu/GII.17/HKG/2014/CUHK-NS-482 | China | Hong Kong | 2014 | GII.17 |  |
|            | Norovirus                      |       |           |      |        |  |
| KP902571.1 | Hu/GII.17/HKG/2014/CUHK-NS-480 | China | Hong Kong | 2014 | GII.17 |  |
|            | Norovirus                      |       |           |      |        |  |
| KP902570.1 | Hu/GII.17/HKG/2014/CUHK-NS-463 | China | Hong Kong | 2014 | GII.17 |  |
|            | Norovirus                      |       |           |      |        |  |
| KP902569.1 | Hu/GII.17/HKG/2014/CUHK-NS-456 | China | Hong Kong | 2014 | GII.17 |  |
|            | Norovirus                      |       |           |      |        |  |
| KP902568.1 | Hu/GII.17/HKG/2014/CUHK-NS-455 | China | Hong Kong | 2014 | GII.17 |  |
|            | Norovirus                      |       |           |      |        |  |
| KP902567.1 | Hu/GII.17/HKG/2014/CUHK-NS-438 | China | Hong Kong | 2014 | GII.17 |  |



Table S1. Cont.

|            |                                   |       |           |      |        |  |
|------------|-----------------------------------|-------|-----------|------|--------|--|
|            | Norovirus                         |       |           |      |        |  |
| KP902566.1 | Hu/GII.17/HKG/2014/CUHK-NS-405    | China | Hong Kong | 2014 | GII.17 |  |
|            | Norovirus                         |       |           |      |        |  |
| KP902565.1 | Hu/GII.17/HKG/2014/CUHK-NS-360    | China | Hong Kong | 2014 | GII.17 |  |
|            | Norovirus                         |       |           |      |        |  |
| KP902564.1 | Hu/GII.17/HKG/2014/CUHK-NS-276    | China | Hong Kong | 2014 | GII.17 |  |
|            | Norovirus                         |       |           |      |        |  |
| KP902563.1 | Hu/GII.17/HKG/2014/CUHK-NS-258    | China | Hong Kong | 2014 | GII.17 |  |
|            | Norovirus GII.3 strain            |       |           |      |        |  |
| KJ499445.1 | GII/Hu/HKG/2014/GII.3/CUHK-NS-232 | China | Hong Kong | 2014 | GII.3  |  |
|            | Norovirus GII.3 strain            |       |           |      |        |  |
| KJ499444.1 | GII/Hu/HKG/2014/GII.3/CUHK-NS-227 | China | Hong Kong | 2014 | GII.3  |  |
|            | Norovirus GII.3 strain            |       |           |      |        |  |
| KJ499443.1 | GII/Hu/HKG/2013/GII.3/CUHK-NS-218 | China | Hong Kong | 2013 | GII.3  |  |
|            | Norovirus GII.3 strain            |       |           |      |        |  |
| KJ499442.1 | GII/Hu/HKG/2013/GII.3/CUHK-NS-201 | China | Hong Kong | 2013 | GII.3  |  |
|            | Norovirus GII.3 strain            |       |           |      |        |  |
| KJ499441.1 | GII/Hu/HKG/2013/GII.3/CUHK-NS-193 | China | Hong Kong | 2013 | GII.3  |  |
|            | Norovirus                         |       |           |      |        |  |
| JX074065.1 | Hu/GI.4/GuizhouCDC189/2010/CHN    | China | Guizhou   | 2010 | GI.4   |  |
|            | Norovirus                         |       |           |      |        |  |
| KM514079.1 | GII/Hu/HKG/2014/GII.4/CUHK-NS-336 | China | Hong Kong | 2014 | GII.4  |  |
|            | Norovirus                         |       |           |      |        |  |
| KM514078.1 | GII/Hu/HKG/2014/GII.4/CUHK-NS-335 | China | Hong Kong | 2014 | GII.4  |  |
|            | Norovirus                         |       |           |      |        |  |
| KM514077.1 | GII/Hu/HKG/2014/GII.4/CUHK-NS-334 | China | Hong Kong | 2014 | GII.4  |  |
|            | Norovirus                         |       |           |      |        |  |
| KM514076.1 | GII/Hu/HKG/2014/GII.4/CUHK-NS-333 | China | Hong Kong | 2014 | GII.4  |  |
|            | Norovirus                         |       |           |      |        |  |
| KM514074.1 | GII/Hu/HKG/2014/GII.4/CUHK-NS-331 | China | Hong Kong | 2014 | GII.4  |  |

Table S1. Cont.

|            |                                   |       |           |      |       |  |
|------------|-----------------------------------|-------|-----------|------|-------|--|
|            | Norovirus                         |       |           |      |       |  |
| KM514073.1 | GII/Hu/HKG/2014/GII.4/CUHK-NS-330 | China | Hong Kong | 2014 | GII.4 |  |
|            | Norovirus                         |       |           |      |       |  |
| KM514072.1 | GII/Hu/HKG/2014/GII.4/CUHK-NS-329 | China | Hong Kong | 2014 | GII.4 |  |
|            | Norovirus                         |       |           |      |       |  |
| KM514071.1 | GII/Hu/HKG/2014/GII.4/CUHK-NS-328 | China | Hong Kong | 2014 | GII.4 |  |
|            | Norovirus                         |       |           |      |       |  |
| KM514070.1 | GII/Hu/HKG/2014/GII.4/CUHK-NS-327 | China | Hong Kong | 2014 | GII.4 |  |
|            | Norovirus                         |       |           |      |       |  |
| KM514069.1 | GII/Hu/HKG/2014/GII.4/CUHK-NS-324 | China | Hong Kong | 2014 | GII.4 |  |
|            | Norovirus                         |       |           |      |       |  |
| KM514068.1 | GII/Hu/HKG/2014/GII.4/CUHK-NS-323 | China | Hong Kong | 2014 | GII.4 |  |
|            | Norovirus                         |       |           |      |       |  |
| KM514067.1 | GII/Hu/HKG/2014/GII.4/CUHK-NS-322 | China | Hong Kong | 2014 | GII.4 |  |
|            | Norovirus                         |       |           |      |       |  |
| KM514066.1 | GII/Hu/HKG/2014/GII.4/CUHK-NS-321 | China | Hong Kong | 2014 | GII.4 |  |
|            | Norovirus                         |       |           |      |       |  |
| KM514065.1 | GII/Hu/HKG/2014/GII.4/CUHK-NS-320 | China | Hong Kong | 2014 | GII.4 |  |
|            | Norovirus                         |       |           |      |       |  |
| KM514064.1 | GII/Hu/HKG/2014/GII.4/CUHK-NS-319 | China | Hong Kong | 2014 | GII.4 |  |
|            | Norovirus                         |       |           |      |       |  |
| KM514063.1 | GII/Hu/HKG/2014/GII.4/CUHK-NS-318 | China | Hong Kong | 2014 | GII.4 |  |
|            | Norovirus                         |       |           |      |       |  |
| KM514062.1 | GII/Hu/HKG/2014/GII.4/CUHK-NS-317 | China | Hong Kong | 2014 | GII.4 |  |
|            | Norovirus                         |       |           |      |       |  |
| KM514061.1 | GII/Hu/HKG/2014/GII.4/CUHK-NS-316 | China | Hong Kong | 2014 | GII.4 |  |
|            | Norovirus                         |       |           |      |       |  |
| KM514060.1 | GII/Hu/HKG/2014/GII.4/CUHK-NS-315 | China | Hong Kong | 2014 | GII.4 |  |
|            | Norovirus                         |       |           |      |       |  |
| KM514059.1 | GII/Hu/HKG/2014/GII.4/CUHK-NS-313 | China | Hong Kong | 2014 | GII.4 |  |

Table S1. Cont.

|            |                                               |       |           |      |       |
|------------|-----------------------------------------------|-------|-----------|------|-------|
|            | Norovirus                                     |       |           |      |       |
| KM514058.1 | GII/Hu/HKG/2014/GII.4/CUHK-NS-312             | China | Hong Kong | 2014 | GII.4 |
|            | Norovirus                                     |       |           |      |       |
| KM514057.1 | GII/Hu/HKG/2014/GII.4/CUHK-NS-311             | China | Hong Kong | 2014 | GII.4 |
|            | Norovirus                                     |       |           |      |       |
| KM396961.1 | GII/Hu/HKG/2014/GII.4/CUHK-NS-339             | China | Hong Kong | 2014 | GII.4 |
| GU228570.1 | Norovirus Hu/GII.4/Hong Kong/CUIF053/2006/CHN | China | Hong Kong | 2006 | GII.4 |
| KT780393.1 | Norovirus Hu/GII.4/CUHK-NS-663/HKG/2015       | China | Hong Kong | 2015 | GII.4 |
| KT780392.1 | Norovirus Hu/GII.4/CUHK-NS-661/HKG/2015       | China | Hong Kong | 2015 | GII.4 |
| KT780391.1 | Norovirus Hu/GII.4/CUHK-NS-660/HKG/2015       | China | Hong Kong | 2015 | GII.4 |
| KT780390.1 | Norovirus Hu/GII.4/CUHK-NS-652/HKG/2015       | China | Hong Kong | 2015 | GII.4 |
| KT780389.1 | Norovirus Hu/GII.4/CUHK-NS-651/HKG/2015       | China | Hong Kong | 2015 | GII.4 |
| KT780388.1 | Norovirus Hu/GII.4/CUHK-NS-618/HKG/2015       | China | Hong Kong | 2015 | GII.4 |
| KT780387.1 | Norovirus Hu/GII.4/CUHK-NS-598/HKG/2015       | China | Hong Kong | 2015 | GII.4 |
| KT780386.1 | Norovirus Hu/GII.4/CUHK-NS-584/HKG/2015       | China | Hong Kong | 2015 | GII.4 |
| KT780385.1 | Norovirus Hu/GII.4/CUHK-NS-572/HKG/2015       | China | Hong Kong | 2015 | GII.4 |
| KT780384.1 | Norovirus Hu/GII.4/CUHK-NS-566/HKG/2015       | China | Hong Kong | 2015 | GII.4 |
| KT780383.1 | Norovirus Hu/GII.4/CUHK-NS-559/HKG/2015       | China | Hong Kong | 2015 | GII.4 |
| KT780382.1 | Norovirus Hu/GII.4/CUHK-NS-555/HKG/2015       | China | Hong Kong | 2015 | GII.4 |
| KT780381.1 | Norovirus Hu/GII.4/CUHK-NS-554/HKG/2015       | China | Hong Kong | 2015 | GII.4 |
| KT780380.1 | Norovirus Hu/GII.4/CUHK-NS-544/HKG/2015       | China | Hong Kong | 2015 | GII.4 |
| KT780379.1 | Norovirus Hu/GII.4/CUHK-NS-542/HKG/2015       | China | Hong Kong | 2015 | GII.4 |
| KT780378.1 | Norovirus Hu/GII.4/CUHK-NS-530/HKG/2015       | China | Hong Kong | 2015 | GII.4 |
| KT780377.1 | Norovirus Hu/GII.4/CUHK-NS-529/HKG/2015       | China | Hong Kong | 2015 | GII.4 |

Table S1. Cont.

|            |                                          |       |           |      |        |
|------------|------------------------------------------|-------|-----------|------|--------|
| KT780376.1 | Norovirus Hu/GII.4/CUHK-NS-526/HKG/2015  | China | Hong Kong | 2015 | GII.4  |
| KT780375.1 | Norovirus Hu/GII.4/CUHK-NS-525/HKG/2015  | China | Hong Kong | 2015 | GII.4  |
| KT780374.1 | Norovirus Hu/GII.4/CUHK-NS-524/HKG/2015  | China | Hong Kong | 2015 | GII.4  |
| KT780373.1 | Norovirus Hu/GII.4/CUHK-NS-516/HKG/2015  | China | Hong Kong | 2015 | GII.4  |
| KT780372.1 | Norovirus Hu/GII.4/CUHK-NS-515/HKG/2015  | China | Hong Kong | 2015 | GII.4  |
| KT780371.1 | Norovirus Hu/GII.4/CUHK-NS-508/HKG/2015  | China | Hong Kong | 2015 | GII.4  |
| KT315719.1 | Norovirus Hu/GII.17/CUHK-NS-671/HKG/2015 | China | Hong Kong | 2015 | GII.17 |
| KT315718.1 | Norovirus Hu/GII.17/CUHK-NS-670/HKG/2015 | China | Hong Kong | 2015 | GII.17 |
| KT315717.1 | Norovirus Hu/GII.17/CUHK-NS-667/HKG/2015 | China | Hong Kong | 2015 | GII.17 |
| KT315716.1 | Norovirus Hu/GII.17/CUHK-NS-662/HKG/2015 | China | Hong Kong | 2015 | GII.17 |
| KT315715.1 | Norovirus Hu/GII.17/CUHK-NS-659/HKG/2015 | China | Hong Kong | 2015 | GII.17 |
| KT315714.1 | Norovirus Hu/GII.17/CUHK-NS-658/HKG/2015 | China | Hong Kong | 2015 | GII.17 |
| KT315713.1 | Norovirus Hu/GII.17/CUHK-NS-657/HKG/2015 | China | Hong Kong | 2015 | GII.17 |
| KT315712.1 | Norovirus Hu/GII.17/CUHK-NS-656/HKG/2015 | China | Hong Kong | 2015 | GII.17 |
| KT315711.1 | Norovirus Hu/GII.17/CUHK-NS-655/HKG/2015 | China | Hong Kong | 2015 | GII.17 |
| KT315710.1 | Norovirus Hu/GII.17/CUHK-NS-653/HKG/2015 | China | Hong Kong | 2015 | GII.17 |
| KT315709.1 | Norovirus Hu/GII.17/CUHK-NS-650/HKG/2015 | China | Hong Kong | 2015 | GII.17 |
| KT315708.1 | Norovirus Hu/GII.17/CUHK-NS-649/HKG/2015 | China | Hong Kong | 2015 | GII.17 |
| KT315707.1 | Norovirus Hu/GII.17/CUHK-NS-648/HKG/2015 | China | Hong Kong | 2015 | GII.17 |
| KT315706.1 | Norovirus Hu/GII.17/CUHK-NS-647/HKG/2015 | China | Hong Kong | 2015 | GII.17 |
| KT315705.1 | Norovirus Hu/GII.17/CUHK-NS-643/HKG/2015 | China | Hong Kong | 2015 | GII.17 |
| KT315704.1 | Norovirus Hu/GII.17/CUHK-NS-641/HKG/2015 | China | Hong Kong | 2015 | GII.17 |
| KT315703.1 | Norovirus Hu/GII.17/CUHK-NS-639/HKG/2015 | China | Hong Kong | 2015 | GII.17 |

Table S1. Cont.

|            |                                          |       |           |      |        |
|------------|------------------------------------------|-------|-----------|------|--------|
| KT315702.1 | Norovirus Hu/GII.17/CUHK-NS-637/HKG/2015 | China | Hong Kong | 2015 | GII.17 |
| KT315701.1 | Norovirus Hu/GII.17/CUHK-NS-636/HKG/2015 | China | Hong Kong | 2015 | GII.17 |
| KT315700.1 | Norovirus Hu/GII.17/CUHK-NS-634/HKG/2015 | China | Hong Kong | 2015 | GII.17 |
| KT315699.1 | Norovirus Hu/GII.17/CUHK-NS-629/HKG/2015 | China | Hong Kong | 2015 | GII.17 |
| KT315698.1 | Norovirus Hu/GII.17/CUHK-NS-627/HKG/2015 | China | Hong Kong | 2015 | GII.17 |
| KT315697.1 | Norovirus Hu/GII.17/CUHK-NS-619/HKG/2015 | China | Hong Kong | 2015 | GII.17 |
| KT315696.1 | Norovirus Hu/GII.17/CUHK-NS-616/HKG/2015 | China | Hong Kong | 2015 | GII.17 |
| KT315695.1 | Norovirus Hu/GII.17/CUHK-NS-612/HKG/2015 | China | Hong Kong | 2015 | GII.17 |
| KT315694.1 | Norovirus Hu/GII.17/CUHK-NS-611/HKG/2015 | China | Hong Kong | 2015 | GII.17 |
| KT315693.1 | Norovirus Hu/GII.17/CUHK-NS-606/HKG/2015 | China | Hong Kong | 2015 | GII.17 |
| KT315692.1 | Norovirus Hu/GII.17/CUHK-NS-604/HKG/2015 | China | Hong Kong | 2015 | GII.17 |
| KT315691.1 | Norovirus Hu/GII.17/CUHK-NS-603/HKG/2015 | China | Hong Kong | 2015 | GII.17 |
| KT315690.1 | Norovirus Hu/GII.17/CUHK-NS-602/HKG/2015 | China | Hong Kong | 2015 | GII.17 |
| KT315689.1 | Norovirus Hu/GII.17/CUHK-NS-600/HKG/2015 | China | Hong Kong | 2015 | GII.17 |
| KT315688.1 | Norovirus Hu/GII.17/CUHK-NS-599/HKG/2015 | China | Hong Kong | 2015 | GII.17 |
| KT315687.1 | Norovirus Hu/GII.17/CUHK-NS-593/HKG/2015 | China | Hong Kong | 2015 | GII.17 |
| KT315686.1 | Norovirus Hu/GII.17/CUHK-NS-592/HKG/2015 | China | Hong Kong | 2015 | GII.17 |
| KT315685.1 | Norovirus Hu/GII.17/CUHK-NS-589/HKG/2015 | China | Hong Kong | 2015 | GII.17 |
| KT315684.1 | Norovirus Hu/GII.17/CUHK-NS-586/HKG/2015 | China | Hong Kong | 2015 | GII.17 |
| KT315683.1 | Norovirus Hu/GII.17/CUHK-NS-582/HKG/2015 | China | Hong Kong | 2015 | GII.17 |
| KT315682.1 | Norovirus Hu/GII.17/CUHK-NS-579/HKG/2015 | China | Hong Kong | 2015 | GII.17 |
| KT315681.1 | Norovirus Hu/GII.17/CUHK-NS-570/HKG/2015 | China | Hong Kong | 2015 | GII.17 |
| KT315680.1 | Norovirus Hu/GII.17/CUHK-NS-560/HKG/2015 | China | Hong Kong | 2015 | GII.17 |

Table S1. Cont.

|            |                                                              |       |           |      |        |
|------------|--------------------------------------------------------------|-------|-----------|------|--------|
| KT315679.1 | Norovirus Hu/GII.17/CUHK-NS-539/HKG/2015                     | China | Hong Kong | 2015 | GII.17 |
| KT315678.1 | Norovirus Hu/GII.17/CUHK-NS-537/HKG/2015                     | China | Hong Kong | 2015 | GII.17 |
| KT315677.1 | Norovirus Hu/GII.17/CUHK-NS-534/HKG/2015                     | China | Hong Kong | 2015 | GII.17 |
| KT315676.1 | Norovirus Hu/GII.17/CUHK-NS-533/HKG/2015                     | China | Hong Kong | 2015 | GII.17 |
| KT315675.1 | Norovirus Hu/GII.17/CUHK-NS-523/HKG/2015                     | China | Hong Kong | 2015 | GII.17 |
| KT315674.1 | Norovirus Hu/GII.17/CUHK-NS-522/HKG/2015                     | China | Hong Kong | 2015 | GII.17 |
| KT315673.1 | Norovirus Hu/GII.17/CUHK-NS-486/HKG/2014                     | China | Hong Kong | 2014 | GII.17 |
| KT315672.1 | Norovirus Hu/GII.17/CUHK-NS-478/HKG/2014                     | China | Hong Kong | 2014 | GII.17 |
| KT315671.1 | Norovirus Hu/GII.17/CUHK-NS-476/HKG/2014                     | China | Hong Kong | 2014 | GII.17 |
| KT315670.1 | Norovirus Hu/GII.17/CUHK-NS-475/HKG/2014                     | China | Hong Kong | 2014 | GII.17 |
| KT315669.1 | Norovirus Hu/GII.17/CUHK-NS-472/HKG/2014                     | China | Hong Kong | 2014 | GII.17 |
| KT315668.1 | Norovirus Hu/GII.17/CUHK-NS-469/HKG/2014                     | China | Hong Kong | 2014 | GII.17 |
| KP698931.1 | Norovirus GII.17 isolate<br>GII/Hu/HKG/2015                  | China | Hong Kong | 2015 | GII.17 |
| KP698930.1 | Norovirus GII.17 isolate<br>GII/Hu/HKG/2015                  | China | Hong Kong | 2015 | GII.17 |
| KP698929.1 | Norovirus GII.17 isolate<br>GII/Hu/HKG/2014                  | China | Hong Kong | 2014 | GII.17 |
| KP698928.1 | Norovirus GII.17 isolate<br>GII/Hu/HKG/2014                  | China | Hong Kong | 2014 | GII.17 |
| KP698927.1 | Norovirus GII.4 isolate<br>GII/Hu/HKG/2014/GII.4/CUHK-NS-505 | China | Hong Kong | 2014 | GII.4  |
| KP698926.1 | Norovirus GII.4 isolate<br>GII/Hu/HKG/2014/GII.4/CUHK-NS-490 | China | Hong Kong | 2014 | GII.4  |
| KP698925.1 | Norovirus GII.4 isolate<br>GII/Hu/HKG/2014/GII.4/CUHK-NS-489 | China | Hong Kong | 2014 | GII.4  |
| KP698924.1 | Norovirus GII.4 isolate<br>GII/Hu/HKG/2014/GII.4/CUHK-NS-485 | China | Hong Kong | 2014 | GII.4  |

Table S1. Cont.

|            |                                                  |       |           |      |        |
|------------|--------------------------------------------------|-------|-----------|------|--------|
|            | Norovirus GII.4 isolate                          |       |           |      |        |
| KP698923.1 | GII/Hu/HKG/2014/GII.4/CUHK-NS-474                | China | Hong Kong | 2014 | GII.4  |
| KR921942.1 | Norovirus Hu/GII.21/CUHK-NS-626/HKG/2015         | China | Hong Kong | 2015 | GII.21 |
| KR921941.1 | Norovirus Hu/GII.21/CUHK-NS-620/HKG/2015         | China | Hong Kong | 2015 | GII.21 |
| KR921940.1 | Norovirus Hu/GII.21/CUHK-NS-609/HKG/2015         | China | Hong Kong | 2015 | GII.21 |
| KR921939.1 | Norovirus Hu/GII.21/CUHK-NS-601/HKG/2015         | China | Hong Kong | 2015 | GII.21 |
| KR921938.1 | Norovirus Hu/GII.21/CUHK-NS-591/HKG/2015         | China | Hong Kong | 2015 | GII.21 |
| KR921937.1 | Norovirus Hu/GII.21/CUHK-NS-293/HKG/2014         | China | Hong Kong | 2014 | GII.21 |
| KR921936.1 | Norovirus Hu/GII.21/CUHK-NS-291/HKG/2014         | China | Hong Kong | 2014 | GII.21 |
| KR921935.1 | Norovirus Hu/GII.21/CUHK-NS-290/HKG/2014         | China | Hong Kong | 2014 | GII.21 |
| JX989075.1 | Norovirus Hu/GII.6/GZ2010-L96/Guangzhou/CHN/2011 | China | Guangdong | 2011 | GII.6  |
| JX989074.1 | Norovirus Hu/GII.4/GZ2010-L87/Guangzhou/CHN/2011 | China | Guangdong | 2011 | GII.4  |
|            | Norovirus GII isolate                            |       |           |      |        |
| KT970377.1 | Hu/Guangzhou/GZ2015-L362/CHN/2015                | China | Guangdong | 2015 | GII    |
|            | Norovirus GII isolate                            |       |           |      |        |
| KT970376.1 | Hu/Guangzhou/GZ2015-L343/CHN/2015                | China | Guangdong | 2015 | GII    |
|            | Norovirus GII isolate                            |       |           |      |        |
| KT970375.1 | Hu/Guangzhou/GZ2015-L340/CHN/2015                | China | Guangdong | 2015 | GII    |
|            | Norovirus GII isolate                            |       |           |      |        |
| KT970374.1 | Hu/Guangzhou/GZ2015-L339/CHN/2015                | China | Guangdong | 2015 | GII    |
|            | Norovirus GII isolate                            |       |           |      |        |
| KT970373.1 | Hu/Guangzhou/GZ2015-L337/CHN/2015                | China | Guangdong | 2015 | GII    |
|            | Norovirus GII isolate                            |       |           |      |        |
| KT970372.1 | Hu/Guangzhou/GZ2015-L325/CHN/2015                | China | Guangdong | 2015 | GII    |
|            | Norovirus GII isolate                            |       |           |      |        |
| KT970371.1 | Hu/Guangzhou/GZ2015-L324/CHN/2015                | China | Guangdong | 2015 | GII    |

Table S1. Cont.

|             |                                                  |       |           |      |        |
|-------------|--------------------------------------------------|-------|-----------|------|--------|
|             | Norovirus GII isolate                            |       |           |      |        |
| KT970370.1  | Hu/Guangzhou/GZ2014-L313/CHN/2014                | China | Guangdong | 2014 | GII    |
|             | Norovirus GII isolate                            |       |           |      |        |
| KT970369.1  | Hu/Guangzhou/GZ2014-L311/CHN/2014                | China | Guangdong | 2014 | GII    |
|             | Norovirus Hu/GII.4/GZ2010-L26/Guangzhou/CHN/2010 |       |           |      |        |
| JX989073.1  |                                                  | China | Guangdong | 2010 | GII.4  |
|             | Norovirus GII isolate                            |       |           |      |        |
| KT202798.1  | Hu/Guangzhou/GZ2014-L307/CHN/2014                | China | Guangdong | 2014 | GII    |
|             | Norovirus GII isolate                            |       |           |      |        |
| KT202797.1  | Hu/Guangzhou/GZ2014-L295/CHN/2014                | China | Guangdong | 2014 | GII    |
|             | Norovirus GII isolate                            |       |           |      |        |
| KT202796.1  | Hu/Guangzhou/GZ2014-L132/CHN/2014                | China | Guangdong | 2014 | GII    |
|             | Norovirus GII isolate                            |       |           |      |        |
| KT202795.1  | Hu/Guangzhou/GZ2014-L122/CHN/2014                | China | Guangdong | 2014 | GII    |
|             | Norovirus GII isolate                            |       |           |      |        |
| KT202794.1  | Hu/Guangzhou/GZ2014-L106/CHN/2014                | China | Guangdong | 2014 | GII    |
|             | Norovirus GII isolate                            |       |           |      |        |
| KT202793.1  | Hu/Guangzhou/GZ2013-L10/CHN/2013                 | China | Guangdong | 2013 | GII    |
|             | Norovirus                                        |       |           |      |        |
| cKU724082.1 | Hu/GII.3/CJ08/2015/CHN                           | China | Shandong  | 2015 | GII.3  |
|             | Norovirus                                        |       |           |      |        |
| KU724081.1  | Hu/GI.6/CJ02/2015/CHN                            | China | Shandong  | 2015 | GI.6   |
|             | Norovirus                                        |       |           |      |        |
| KU724080.1  | Hu/GI.6/CJ05/2015/CHN                            | China | Shandong  | 2015 | GI.6   |
|             | Norovirus GII.17 strain                          |       |           |      |        |
| KT634313.1  | Hu/GII.17/14042025/CHN/2014                      | China | Beijing   | 2014 | GII.17 |
|             | Norovirus GII.17 strain                          |       |           |      |        |
| KT633396.1  | Hu/GII.17/14112061/CHN/2014                      | China | Beijing   | 2014 | GII.17 |
|             | Norovirus GII.17 strain                          |       |           |      |        |
| KT633395.1  | Hu/GII.17/15142012/CHN/2015                      | China | Beijing   | 2015 | GII.17 |
|             | Norovirus GII.17 strain                          |       |           |      |        |
| KT633394.1  | Hu/GII.17/1501Y007/CHN/2015                      | China | Beijing   | 2015 | GII.17 |
|             | Norovirus GII.17 strain                          |       |           |      |        |
| KT633393.1  | Hu/GII.17/1405Y098/CHN/2014                      | China | Beijing   | 2014 | GII.17 |
|             | Norovirus GII.17 strain                          |       |           |      |        |
| KT633392.1  | Hu/GII.17/1405Y117/CHN/2014                      | China | Beijing   | 2014 | GII.17 |
|             | Norovirus GII.17 strain                          |       |           |      |        |
| KT633391.1  | Hu/GII.17/1405Y139/CHN/2014                      | China | Beijing   | 2014 | GII.17 |



Table S1. Cont.

|            |                                                        |       |          |      |        |
|------------|--------------------------------------------------------|-------|----------|------|--------|
| KT633390.1 | Norovirus GII.17 strain<br>Hu/GII.17/1405Y155/CHN/2014 | China | Beijing  | 2014 | GII.17 |
| KT633389.1 | Norovirus GII.17 strain<br>Hu/GII.17/1405Y160/CHN/2014 | China | Beijing  | 2014 | GII.17 |
| KT633388.1 | Norovirus GII.17 strain<br>Hu/GII.17/1406Y348/CHN/2014 | China | Beijing  | 2014 | GII.17 |
| KT633387.1 | Norovirus GII.17 strain<br>Hu/GII.17/14082073/CHN/2014 | China | Beijing  | 2014 | GII.17 |
| KT633386.1 | Norovirus GII.17 strain<br>Hu/GII.17/14131084/CHN/2014 | China | Beijing  | 2014 | GII.17 |
| KT633385.1 | Norovirus GII.17 strain<br>Hu/GII.17/14281084/CHN/2014 | China | Beijing  | 2014 | GII.17 |
| KT633384.1 | Norovirus GII.17 strain<br>Hu/GII.17/14292035/CHN/2014 | China | Beijing  | 2014 | GII.17 |
| KT633383.1 | Norovirus GII.17 strain<br>Hu/GII.17/15081009/CHN/2015 | China | Beijing  | 2015 | GII.17 |
| KT633382.1 | Norovirus GII.17 strain<br>Hu/GII.17/15092003/CHN/2015 | China | Beijing  | 2015 | GII.17 |
| KR095172.1 | Norovirus<br>Hu/GII.17/15151011/CHN                    | China | Beijing  | 2015 | GII.17 |
| KR095171.1 | Norovirus<br>Hu/GII.17/1501Y002/CHN                    | China | Beijing  | 2015 | GII.17 |
| KR338890.1 | Norovirus GII.17 isolate<br>HU/14F18/PD/SH/CHN/2014    | China | Shanghai | 2014 | GII.17 |
| KR338889.1 | Norovirus GII.17 isolate<br>HU/14F17/PD/SH/CHN/2014    | China | Shanghai | 2014 | GII.17 |
| KR338888.1 | Norovirus GII.17 isolate<br>HU/14F13/PD/SH/CHN/2014    | China | Shanghai | 2014 | GII.17 |
| KR338887.1 | Norovirus GII.17 isolate<br>HU/14F12/PD/SH/CHN/2014    | China | Shanghai | 2014 | GII.17 |
| KR338886.1 | Norovirus GII.17 isolate<br>HU/14F9/PD/SH/CHN/2014     | China | Shanghai | 2014 | GII.17 |
| KR338885.1 | Norovirus GII.17 isolate<br>HU/14F8/PD/SH/CHN/2014     | China | Shanghai | 2014 | GII.17 |
| KR338884.1 | Norovirus GII.17 isolate<br>HU/14F7/PD/SH/CHN/2014     | China | Shanghai | 2014 | GII.17 |
| KR338883.1 | Norovirus GII.17 isolate<br>HU/14F6/PD/SH/CHN/2014     | China | Shanghai | 2014 | GII.17 |
| KR338882.1 | Norovirus GII.17 isolate<br>HU/14F5/PD/SH/CHN/2014     | China | Shanghai | 2014 | GII.17 |
| KR338881.1 | Norovirus GII.17 isolate<br>HU/14F4/PD/SH/CHN/2014     | China | Shanghai | 2014 | GII.17 |
| KR338880.1 | Norovirus GII.17 isolate<br>HU/14F3/PD/SH/CHN/2014     | China | Shanghai | 2014 | GII.17 |
| KR338879.1 | Norovirus GII.17 isolate<br>HU/14F2/PD/SH/CHN/2014     | China | Shanghai | 2014 | GII.17 |

Table S1. Cont.

|            |                                                                                |       |          |      |                    |
|------------|--------------------------------------------------------------------------------|-------|----------|------|--------------------|
| KR338878.1 | Norovirus GII.17 isolate<br>HU/14F1/PD/SH/CHN/2014                             | China | Shanghai | 2014 | GII.17             |
| KR858308.1 | Norovirus GII.17 isolate<br>Hu/Norovirus/GII.17/Shunyi-<br>18/Beijing/CHN/2015 | China | Beijing  | 2015 | GII.17             |
| KC970257.1 | Norovirus<br>Hu/GII.4/Beijing/PKUPH-<br>101/Inpatient/2013/CHN                 | China | Beijing  | 2013 | GII.4              |
| KC970256.1 | Norovirus<br>Hu/GII.4/Beijing/PKUPH-<br>87/Inpatient/2013/CHN                  | China | Beijing  | 2013 | GII.4              |
| KC970255.1 | Norovirus<br>Hu/GII.4/Beijing/PKUPH-54-<br>8/Inpatient/2013/CHN                | China | Beijing  | 2013 | GII.4              |
| KC970254.1 | Norovirus<br>Hu/GII.4/Beijing/PKUPH-54-<br>7/Inpatient/2013/CHN                | China | Beijing  | 2013 | GII.4              |
| KC970253.1 | Norovirus<br>Hu/GII.4/Beijing/PKUPH-<br>167/Outpatient/2013/CHN                | China | Beijing  | 2013 | GII.4              |
| KC970252.1 | Norovirus<br>Hu/GII.4/Beijing/PKUPH-<br>166/Outpatient/2013/CHN                | China | Beijing  | 2013 | GII.4              |
| KC970251.1 | Norovirus<br>Hu/GII.4/Beijing/PKUPH-<br>160/Outpatient/2013/CHN                | China | Beijing  | 2013 | GII.4              |
| KC970250.1 | Norovirus<br>Hu/GII.4/Beijing/PKUPH-<br>159/Outpatient/2013/CHN                | China | Beijing  | 2013 | GII.4              |
| KC970249.1 | Norovirus<br>Hu/GII.4/Beijing/PKUPH-<br>147/Outpatient/2013/CHN                | China | Beijing  | 2013 | GII.4              |
| KC970248.1 | Norovirus<br>Hu/GII.4/Beijing/PKUPH-<br>140/Outpatient/2013/CHN                | China | Beijing  | 2013 | GII.4              |
| KC970247.1 | Norovirus<br>Hu/GI.3/Beijing/PKUPH-<br>137/Outpatient/2013/CHN                 | China | Beijing  | 2013 | GI.3               |
| KC970246.1 | Norovirus<br>Hu/GII.4/Beijing/PKUPH-<br>134/Outpatient/2013/CHN                | China | Beijing  | 2013 | GII.4              |
| KP335155.1 | Norovirus<br>Hu/GII.P17_GII.17/Jinshan15/Shan<br>ghai/2014/CHN                 | China | Beijing  | 2014 | GII.P17_GI<br>I.17 |

Table S1. Cont.

|            |                                                  |       |          |      |              |  |
|------------|--------------------------------------------------|-------|----------|------|--------------|--|
|            | Norovirus                                        |       |          |      |              |  |
| KP335154.1 | Hu/GII.P17/Jinshan19/Shanghai/2014/CHN           | China | Shanghai | 2014 | GII.P17      |  |
|            | Norovirus                                        |       |          |      |              |  |
| KP335153.1 | Hu/GII.P17/Jinshan13/Shanghai/2014/CHN           | China | Shanghai | 2014 | GII.P17      |  |
|            | Norovirus                                        |       |          |      |              |  |
| KP335152.1 | Hu/GII.P17/Jinshan10/Shanghai/2014/CHN           | China | Shanghai | 2014 | GII.P17      |  |
|            | Norovirus                                        |       |          |      |              |  |
| KP335151.1 | Hu/GII.P17/Jinshan09/Shanghai/2014/CHN           | China | Shanghai | 2014 | GII.P17      |  |
|            | Norovirus                                        |       |          |      |              |  |
| KP335150.1 | Hu/GII.P17/Jinshan06/Shanghai/2014/CHN           | China | Shanghai | 2014 | GII.P17      |  |
| KR269703.1 | Norovirus GII.17 isolate water/14Y04/CS/CHN/2014 | China | Hunan    | 2014 | GII.17       |  |
| KR269702.1 | Norovirus GII.17 isolate water/14Y03/CS/CHN/2014 | China | Hunan    | 2014 | GII.17       |  |
| KR269701.1 | Norovirus GII.17 isolate water/14Y02/CS/CHN/2014 | China | Hunan    | 2014 | GII.17       |  |
| KR269700.1 | Norovirus GII.17 isolate water/14Y01/CS/CHN/2014 | China | Hunan    | 2014 | GII.17       |  |
| KR269699.1 | Norovirus GII.17 isolate Hu/14Y06/CS/CHN/2014    | China | Hunan    | 2014 | GII.17       |  |
| KR269698.1 | Norovirus GII.17 isolate Hu/14Y05/CS/CHN/2014    | China | Hunan    | 2014 | GII.17       |  |
| KR269697.1 | Norovirus GII.17 isolate Hu/14Y04/CS/CHN/2014    | China | Hunan    | 2014 | GII.17       |  |
| KR269696.1 | Norovirus GII.17 isolate Hu/14Y03/CS/CHN/2014    | China | Hunan    | 2014 | GII.17       |  |
| KR269695.1 | Norovirus GII.17 isolate Hu/14Y02/CS/CHN/2014    | China | Hunan    | 2014 | GII.17       |  |
| KR269694.1 | Norovirus GII.17 isolate Hu/14Y01/CS/CHN/2014    | China | Hunan    | 2014 | GII.17       |  |
|            | Norovirus                                        |       |          |      |              |  |
| KM924012.1 | Hu/GII.P7_GII.6/1415Y002/CHN/2014                | China | Beijing  | 2014 | GII.P7_GII.6 |  |
|            | Norovirus                                        |       |          |      |              |  |
| KM924011.1 | Hu/GII.P7_GII.6/1406Y114/CHN/2014                | China | Beijing  | 2014 | GII.P7_GII.6 |  |
|            | Norovirus                                        |       |          |      |              |  |
| KM924010.1 | Hu/GII.P7_GII.6/1405Y035/CHN/2014                | China | Beijing  | 2014 | GII.P7_GII.6 |  |

Table S1. Cont.

|            |                                   |       |          |      |              |  |
|------------|-----------------------------------|-------|----------|------|--------------|--|
|            | Norovirus                         |       |          |      |              |  |
| KM924009.1 | Hu/GII.P7_GII.7/1406Y012/CHN/2014 | China | Beijing  | 2014 | GII.P7_GII.6 |  |
|            | Norovirus                         |       |          |      |              |  |
| KM924008.1 | Hu/GII.P7_GII.6/1405Y024/CHN/2014 | China | Beijing  | 2014 | GII.P7_GII.6 |  |
|            | Norovirus                         |       |          |      |              |  |
| KM924007.1 | Hu/GII.P7_GII.6/1405Y017/CHN/2014 | China | Beijing  | 2014 | GII.P7_GII.6 |  |
|            | Norovirus                         |       |          |      |              |  |
| KM924006.1 | Hu/GII.P7_GII.6/1403Y001/CHN/2014 | China | Beijing  | 2014 | GII.P7_GII.6 |  |
|            | Norovirus                         |       |          |      |              |  |
| KM924005.1 | Hu/GII.P7_GII.6/1401Y127/CHN/2014 | China | Beijing  | 2014 | GII.P7_GII.6 |  |
|            | Norovirus                         |       |          |      |              |  |
| KM924004.1 | Hu/GII.P6_GII.6/1401Y107/CHN/2014 | China | Beijing  | 2014 | GII.P7_GII.6 |  |
|            | Norovirus                         |       |          |      |              |  |
| KM924003.1 | Hu/GII.P7_GII.7/1401Y082/CHN/2014 | China | Beijing  | 2014 | GII.P7_GII.7 |  |
|            | Norovirus                         |       |          |      |              |  |
| KM924002.1 | Hu/GII.P7_GII.6/1401Y075/CHN/2014 | China | Beijing  | 2014 | GII.P7_GII.6 |  |
|            | Norovirus                         |       |          |      |              |  |
| KM924001.1 | Hu/GII.6/1416Y001/CHN/2014        | China | Beijing  | 2014 | GII.6        |  |
|            | Norovirus                         |       |          |      |              |  |
| KC473548.1 | Hu/GI/HuzhouN10/2008/CHN          | China | Zhejiang | 2008 | GI           |  |
|            | Norovirus                         |       |          |      |              |  |
| KC473547.1 | Hu/GI/HuzhouN11/2008/CHN          | China | Zhejiang | 2008 | GI           |  |
|            | Norovirus                         |       |          |      |              |  |
| KC473546.1 | Hu/GII.4/Huzhou128/2012/CHN       | China | Zhejiang | 2012 | GII.4        |  |
|            | Norovirus                         |       |          |      |              |  |
| KC473545.1 | Hu/GII.4/Huzhou122/2012/CHN       | China | Zhejiang | 2012 | GII.4        |  |
|            | Norovirus                         |       |          |      |              |  |
| KC473544.1 | Hu/GII.4/Huzhou121/2012/CHN       | China | Zhejiang | 2012 | GII.4        |  |
|            | Norovirus                         |       |          |      |              |  |
| JX644039.1 | Hu/GII.4/N101/2011/HuZhou         | China | Zhejiang | 2011 | GII.4        |  |
|            | Norovirus                         |       |          |      |              |  |
| JX644038.1 | Hu/GII.4/N100/2011/HuZhou         | China | Zhejiang | 2011 | GII.4        |  |
|            | Norovirus                         |       |          |      |              |  |
| JX644037.1 | Hu/GII.4/N95/2011/HuZhou          | China | Zhejiang | 2011 | GII.4        |  |
|            | Norovirus                         |       |          |      |              |  |
| JX644036.1 | Hu/GII.4/N94/2011/HuZhou          | China | Zhejiang | 2011 | GII.4        |  |
|            | Norovirus                         |       |          |      |              |  |
| JX644035.1 | Hu/GII.4/N93/2011/HuZhou          | China | Zhejiang | 2011 | GII.4        |  |

Table S1. Cont.

|            |                                                       |       |           |      |        |
|------------|-------------------------------------------------------|-------|-----------|------|--------|
| JX644034.1 | Norovirus<br>Hu/GII.4/N91/2011/HuZhou                 | China | Zhejiang  | 2011 | GII.4  |
| JX644033.1 | Norovirus<br>Hu/GII.4/N82/2011/HuZhou                 | China | Zhejiang  | 2011 | GII.4  |
| JX644032.1 | Norovirus<br>Hu/GII.4/N78/2010/HuZhou                 | China | Zhejiang  | 2010 | GII.4  |
| JX644031.1 | Norovirus<br>Hu/GII.4/N76/2010/HuZhou                 | China | Zhejiang  | 2010 | GII.4  |
| JX644030.1 | Norovirus<br>Hu/GII.4/N13/2009/HuZhou                 | China | Zhejiang  | 2009 | GII.4  |
| JX644029.1 | Norovirus<br>Hu/GII.4/N5/2008/HuZhou                  | China | Zhejiang  | 2008 | GII.4  |
| JX644028.1 | Norovirus<br>Hu/GII.4/N4/2008/HuZhou                  | China | Zhejiang  | 2008 | GII.4  |
| JX644027.1 | Norovirus<br>Hu/GII.4/N3/2008/HuZhou                  | China | Zhejiang  | 2008 | GII.4  |
| JX644026.1 | Norovirus<br>Hu/GII.4/N2/2008/HuZhou                  | China | Zhejiang  | 2008 | GII.4  |
| JX644025.1 | Norovirus<br>Hu/GII.4/N8/2008/HuZhou                  | China | Zhejiang  | 2008 | GII.4  |
| HM195195.1 | Norovirus<br>Hu/GII.4/Xiamen/54/2010/CHN              | China | Fujian    | 2010 | GII.4  |
| HM195194.1 | Norovirus<br>Hu/GII.4/Xiamen/53/2010/CHN              | China | Fujian    | 2010 | GII.4  |
| HM195193.1 | Norovirus<br>Hu/GII.4/Xiamen/52/2010/CHN              | China | Fujian    | 2010 | GII.4  |
| HM195192.1 | Norovirus<br>Hu/GII.4/Xiamen/51/2010/CHN              | China | Fujian    | 2010 | GII.4  |
| KC894731.1 | Norovirus Hu/GIV.1/CCDC<br>GR1113-59/CHN              | China | Beijing   | 2011 | GIV.1  |
| JX282191.1 | Norovirus<br>Hu/GII/Shenzhen/JB030930009/200<br>9/CHN | China | Guangdong | 2009 | GII    |
| JN596814.1 | Norovirus<br>Hu/GII.3/HZ0708/2009/China               | China | Shanghai  | 2009 | GII.3  |
| JN596813.1 | Norovirus<br>Hu/GII.3/CQ0378/2009/China               | China | Shanghai  | 2009 | GII.3  |
| JN596812.1 | Norovirus<br>Hu/GII.3/TJ0738/2009/China               | China | Shanghai  | 2009 | GII.3  |
| JN596811.1 | Norovirus<br>Hu/GII.3/SH0774/2009/China               | China | Shanghai  | 2009 | GII.3  |
| JN596810.1 | Norovirus<br>Hu/GII.14/SH0326/2009/China              | China | Shanghai  | 2009 | GII.14 |
| JN596809.1 | Norovirus<br>Hu/GII.6/TJ0478/2009/China               | China | Shanghai  | 2009 | GII.6  |

Table S1. Cont.

|            |                                                      |       |          |      |        |
|------------|------------------------------------------------------|-------|----------|------|--------|
| JN596808.1 | Norovirus<br>Hu/GII.6/HZ1058/2008/China              | China | Shanghai | 2009 | GII.6  |
| JN596807.1 | Norovirus<br>Hu/GII.6/CQ0159/2009/China              | China | Shanghai | 2009 | GII.6  |
| JN596806.1 | Norovirus<br>Hu/GII.6/SH1157/2008/China              | China | Shanghai | 2009 | GII.6  |
| JN596805.1 | Norovirus<br>Hu/GII.4/TJ0779/2009/China              | China | Shanghai | 2009 | GII.4  |
| JN596804.1 | Norovirus<br>Hu/GII.4/CQ1046/2008/China              | China | Shanghai | 2008 | GII.4  |
| JN596803.1 | Norovirus<br>Hu/GII.4/HZ0730/2009/China              | China | Shanghai | 2009 | GII.4  |
| JN596802.1 | Norovirus<br>Hu/GII.4/SH0646/2009/China              | China | Shanghai | 2009 | GII.4  |
| JN596801.1 | Norovirus<br>Hu/GII.4/TJ1008/2008/China              | China | Shanghai | 2008 | GII.4  |
| JN596800.1 | Norovirus<br>Hu/GII.4/SHO907/2008/China              | China | Shanghai | 2008 | GII.4  |
| JN596799.1 | Norovirus<br>Hu/GII.4/HZ1244/2008/China              | China | Shanghai | 2008 | GII.4  |
| JN596798.1 | Norovirus<br>Hu/GII.4/CQ0707/2009/China              | China | Shanghai | 2009 | GII.4  |
| JN596797.1 | Norovirus<br>Hu/GII.13/TJ1216/2008/China             | China | Shanghai | 2008 | GII.13 |
| JN596796.1 | Norovirus<br>Hu/GII.13/CQ0311/2009/China             | China | Shanghai | 2009 | GII.13 |
| JN596794.1 | Norovirus<br>Hu/GII.2/CQ0432/2009/China              | China | Shanghai | 2009 | GII.2  |
| JN596793.1 | Norovirus<br>Hu/GII.16/TJ1142/2008/China             | China | Shanghai | 2008 | GII.16 |
| JN596792.1 | Norovirus<br>Hu/GII.12/SH0450/2009/China             | China | Shanghai | 2009 | GII.12 |
| JN596791.1 | Norovirus<br>Hu/GII.12/CQ0470/2009/China             | China | Shanghai | 2009 | GII.12 |
| JN596790.1 | Norovirus<br>Hu/GII.12/TJ0128/2009/China             | China | Shanghai | 2009 | GII.12 |
| JN596789.1 | Norovirus<br>Hu/GII.7/CQ0248/2009/China              | China | Shanghai | 2009 | GII.7  |
| KT992790.1 | Norovirus<br>Hu/GII.17/HNkaohao/Nanyang/C<br>HN/2015 | China | Henan    | 2015 | GII.7  |
| KT992789.1 | Norovirus<br>Hu/GII.17/HN05/Nanyang/CHN              | China | Henan    | 2015 | GII.7  |
| KT992788.1 | Norovirus<br>Hu/GII.17/HN04/Nanyang/CHN              | China | Henan    | 2015 | GII.7  |

Table S1. Cont.

|            |                                                              |       |           |      |                    |
|------------|--------------------------------------------------------------|-------|-----------|------|--------------------|
| KT992787.1 | Norovirus<br>Hu/GII.17/HN03/Nanyang/CHN                      | China | Henan     | 2015 | GII.7              |
| KT992786.1 | Norovirus<br>Hu/GII.17/HN02/Nanyang/CHN                      | China | Henan     | 2015 | GII.7              |
| KT992785.1 | Norovirus<br>Hu/GII.17/HN01/Nanyang/CHN                      | China | Henan     | 2015 | GII.7              |
| KF306214.1 | Norovirus<br>Hu/GII.4/Jingzhou/2013403/CHN                   | China | Hubei     | 2013 | GII.4              |
| KF306213.1 | Norovirus<br>Hu/GII.3/Jingzhou/2013402/CHN                   | China | Hubei     | 2013 | GII.3              |
| KF306212.1 | Norovirus<br>Hu/GI.2/Jingzhou/2013401/CHN                    | China | Hubei     | 2013 | GI.2               |
| KC577174.1 | Norovirus<br>Hu/GII.4/Jiangsu1/2011/CHN                      | China | Jiangsu   | 2011 | GII.4              |
| KF586512.1 | Norovirus GII.4 isolate<br>CAIQ13040396                      | China | Beijing   | 2013 | GII.4              |
| GQ223404.1 | Norovirus<br>Hu/GII.4/SHZH012/2007/CHN                       | China | Guangdong | 2007 | GII.4              |
| GQ223403.1 | Norovirus<br>Hu/GII.4/SHZH009/2007/CHN                       | China | Guangdong | 2007 | GII.4              |
| GQ223402.1 | Norovirus<br>Hu/GII.4/SHZH004/2007/CHN                       | China | Guangdong | 2007 | GII.4              |
| GQ223401.1 | Norovirus<br>Hu/GII.4/SHZH168/2007/CHN                       | China | Guangdong | 2007 | GII.4              |
| GQ223400.1 | Norovirus<br>Hu/GII.4/SHZH154/2007/CHN                       | China | Guangdong | 2007 | GII.4              |
| GQ223399.1 | Norovirus<br>Hu/GII.4/SHZH166/2007/CHN                       | China | Guangdong | 2007 | GII.4              |
| KP676383.1 | Norovirus<br>Hu/GII/CN/2013/GII.P17_GII.17/N<br>anjing010141 | China | Jiangsu   | 2013 | GII.P17_GII.<br>17 |
| EU839595.1 | Norovirus<br>Hu/GII/Beijing/362/2007/CHN                     | China | Beijing   | 2007 | GII                |
| EU839594.1 | Norovirus<br>Hu/GII/Beijing/361/2007/CHN                     | China | Beijing   | 2007 | GII                |
| EU839593.1 | Norovirus<br>Hu/GII/Beijing/321/2007/CHN                     | China | Beijing   | 2007 | GII                |
| EU839592.1 | Norovirus<br>Hu/GII/Beijing/127/2007/CHN                     | China | Beijing   | 2007 | GII                |
| EU839591.1 | Norovirus<br>Hu/GII/Beijing/125/2007/CHN                     | China | Beijing   | 2007 | GII                |
| EU839590.1 | Norovirus<br>Hu/GII/Beijing/116/2007/CHN                     | China | Beijing   | 2007 | GII                |
| EU839589.1 | Norovirus<br>Hu/GII/Beijing/34/2006/CHN                      | China | Beijing   | 2006 | GII                |

Table S1. Cont.

|            |                                           |       |         |      |       |
|------------|-------------------------------------------|-------|---------|------|-------|
| EU839588.1 | Norovirus<br>Hu/GII/Beijing/07/2006/CHN   | China | Beijing | 2006 | GII   |
| EU839587.1 | Norovirus<br>Hu/GII/Beijing/493/2005/CHN  | China | Beijing | 2006 | GII   |
| EU839586.1 | Norovirus<br>Hu/GII/Beijing/484/2005/CHN  | China | Beijing | 2006 | GII   |
| EU839585.1 | Norovirus<br>Hu/GII/Beijing/274/2005/CHN  | China | Beijing | 2005 | GII   |
| EU839584.1 | Norovirus<br>Hu/GII/Beijing/221/2005/CHN  | China | Beijing | 2005 | GII   |
| EU839583.1 | Norovirus<br>Hu/GII/Beijing/79/2004/CHN   | China | Beijing | 2004 | GII   |
| EU839582.1 | Norovirus<br>Hu/GII/Beijing/39/2004/CHN   | China | Beijing | 2004 | GII   |
| EU839581.1 | Norovirus<br>Hu/GII/Beijing/30/2004/CHN   | China | Beijing | 2004 | GII   |
| JX155754.1 | Norovirus<br>Hu/GII.4/Xi'an/C45/2010/CHN  | China | Sshanxi | 2010 | GII.4 |
| JX155753.1 | Norovirus<br>Hu/GII.4/Xi'an/C41/2010/CHN  | China | Sshanxi | 2010 | GII.4 |
| JX155752.1 | Norovirus<br>Hu/GII.4/Xi'an/C31/2010/CHN  | China | Sshanxi | 2010 | GII.4 |
| JX155751.1 | Norovirus<br>Hu/GII.4/Xi'an/C30/2010/CHN  | China | Sshanxi | 2010 | GII.4 |
| JX155750.1 | Norovirus<br>Hu/GII.4/Xi'an/C21/2010/CHN  | China | Sshanxi | 2010 | GII.4 |
| JX155749.1 | Norovirus<br>Hu/GII.4/Xi'an/C15/2010/CHN  | China | Sshanxi | 2010 | GII.4 |
| JX155748.1 | Norovirus<br>Hu/GII.4/Xi'an/C12/2010/CHN  | China | Sshanxi | 2010 | GII.4 |
| JX155747.1 | Norovirus<br>Hu/GII.4/Xi'an/C6/2010/CHN   | China | Sshanxi | 2010 | GII.4 |
| JX155746.1 | Norovirus<br>Hu/GII.4/Xi'an/P185/2010/CHN | China | Sshanxi | 2010 | GII.4 |
| JX155745.1 | Norovirus<br>Hu/GII.4/Xi'an/P158/2010/CHN | China | Sshanxi | 2010 | GII.4 |
| JX155744.1 | Norovirus<br>Hu/GII.4/Xi'an/P154/2010/CHN | China | Sshanxi | 2010 | GII.4 |
| JX155743.1 | Norovirus<br>Hu/GII.4/Xi'an/P152/2010/CHN | China | Sshanxi | 2010 | GII.4 |
| JX155742.1 | Norovirus<br>Hu/GII.4/Xi'an/P143/2010/CHN | China | Sshanxi | 2010 | GII.4 |
| JX155741.1 | Norovirus<br>Hu/GII.4/Xi'an/P131/2010/CHN | China | Sshanxi | 2010 | GII.4 |
| JX155740.1 | Norovirus<br>Hu/GII.4/Xi'an/P128/2010/CHN | China | Sshanxi | 2010 | GII.4 |



Table S1. Cont.

|            |                                                          |       |           |      |       |
|------------|----------------------------------------------------------|-------|-----------|------|-------|
| JX155739.1 | Norovirus<br>Hu/GII.4/Xi'an/P49/2010/CHN                 | China | Sshanxi   | 2010 | GII.4 |
| JX155738.1 | Norovirus<br>Hu/GII.4/Xi'an/P46/2010/CHN                 | China | Sshanxi   | 2010 | GII.4 |
| JX155737.1 | Norovirus<br>Hu/GII.4/Xi'an/P19/2010/CHN                 | China | Sshanxi   | 2010 | GII.4 |
| KC894943.1 | Norovirus<br>Hu/GII.4/Guangzhou/GZ2010-<br>L91/CHN/2011  | China | Guangdong | 2011 | GII.4 |
| KC894942.1 | Norovirus<br>Hu/GII.4/Guangzhou/GZ2010-<br>L88/CHN/2011  | China | Guangdong | 2011 | GII.4 |
| JQ934820.1 | Norovirus<br>Hu/GII.g/GuizhouCDC397/Guizho<br>u/2010/CNA | China | Guizhou   | 2010 | GII.g |
| JQ934819.1 | Norovirus<br>Hu/GII.3/GuizhouCDC62/Guizhou<br>/2010/CNA  | China | Guizhou   | 2010 | GII.3 |
| JQ934818.1 | Norovirus<br>Hu/GII.3/GuizhouCDC44/Guizhou<br>/2010/CNA  | China | Guizhou   | 2010 | GII.3 |
| JQ934817.1 | Norovirus<br>Hu/GII.3/GuizhouCDC42/Guizhou<br>/2010/CNA  | China | Guizhou   | 2010 | GII.3 |
| JQ934816.1 | Norovirus<br>Hu/GII.3/GuizhouCDC33/Guizhou<br>/2010/CNA  | China | Guizhou   | 2010 | GII.3 |
| JQ934815.1 | Norovirus<br>Hu/GII.4/GuizhouCDC425/Guizho<br>u/2010/CNA | China | Guizhou   | 2010 | GII.4 |
| JQ934814.1 | Norovirus<br>Hu/GII.4/GuizhouCDC415/Guizho<br>u/2010/CNA | China | Guizhou   | 2010 | GII.4 |
| JQ934813.1 | Norovirus<br>Hu/GII.4/GuizhouCDC403/Guizho<br>u/2010/CNA | China | Guizhou   | 2010 | GII.4 |
| JQ934812.1 | Norovirus<br>Hu/GII.4/GuizhouCDC390/Guizho<br>u/2010/CNA | China | Guizhou   | 2010 | GII.4 |
| JQ934811.1 | Norovirus<br>Hu/GII.4/GuizhouCDC351/Guizho<br>u/2010/CNA | China | Guizhou   | 2010 | GII.4 |
| JQ934810.1 | Norovirus<br>Hu/GII.4/GuizhouCDC312/Guizho<br>u/2010/CNA | China | Guizhou   | 2010 | GII.4 |

Table S1. Cont.

| Norovirus  |                                         |       |         |      |        |  |
|------------|-----------------------------------------|-------|---------|------|--------|--|
| JQ934809.1 | Hu/GII.4/GuizhouCDC300/Guizhou/2010/CNA | China | Guizhou | 2010 | GII.4  |  |
| JQ934808.1 | Hu/GII.4/GuizhouCDC292/Guizhou/2010/CNA | China | Guizhou | 2010 | GII.4  |  |
| JQ934807.1 | Hu/GII.4/GuizhouCDC239/Guizhou/2010/CNA | China | Guizhou | 2010 | GII.4  |  |
| KT716755.1 | Hu/GII.17/JB031520278/CHN/2015          | China | Hubei   | 2015 | GII.17 |  |
| KT716754.1 | Hu/GII.17/JB031520258/CHN/2015          | China | Hubei   | 2015 | GII.17 |  |
| KT716753.1 | Hu/GII.17/JB031520249/CHN/2015          | China | Hubei   | 2015 | GII.17 |  |
| KT716752.1 | Hu/GII.17/JB031520198/CHN/2015          | China | Hubei   | 2015 | GII.17 |  |
| KT716751.1 | Hu/GII.17/JB031520197/CHN/2015          | China | Hubei   | 2015 | GII.17 |  |
| KT716750.1 | Hu/GII.17/JB031520193/CHN/2015          | China | Hubei   | 2015 | GII.17 |  |
| KT716749.1 | Hu/GII.17/JB031520189/CHN/2015          | China | Hubei   | 2015 | GII.17 |  |
| KT716748.1 | Hu/GII.17/JB031520150/CHN/2015          | China | Hubei   | 2015 | GII.17 |  |
| KT716747.1 | Hu/GII.17/JB031520137/CHN/2015          | China | Hubei   | 2015 | GII.17 |  |
| KT716746.1 | Hu/GII.17/JB031520120/CHN/2015          | China | Hubei   | 2015 | GII.17 |  |
| KT716745.1 | Hu/GII.17/JB031520105/CHN/2015          | China | Hubei   | 2015 | GII.17 |  |
| KT716744.1 | Hu/GII.17/JB031520104/CHN/2015          | China | Hubei   | 2015 | GII.17 |  |
| KT716743.1 | Hu/GII.17/JB031520066/CHN/2015          | China | Hubei   | 2015 | GII.17 |  |
| KT716742.1 | Hu/GII.17/JB031520060/CHN/2015          | China | Hubei   | 2015 | GII.17 |  |
| KT716741.1 | Hu/GII.17/JB031520054/CHN/2015          | China | Hubei   | 2015 | GII.17 |  |
| KT716740.1 | Hu/GII.17/JB031520046/CHN/2015          | China | Hubei   | 2015 | GII.17 |  |
| KT716739.1 | Hu/GII.17/JB031520043/CHN/2015          | China | Hubei   | 2015 | GII.17 |  |
| KT716738.1 | Hu/GII.17/JB031520041/CHN/2015          | China | Hubei   | 2015 | GII.17 |  |

Table S1. Cont.

|            |                                             |       |       |      |        |
|------------|---------------------------------------------|-------|-------|------|--------|
| KT716737.1 | Norovirus<br>Hu/GII.17/JB031520038/CHN/2015 | China | Hubei | 2015 | GII.17 |
| KT716736.1 | Norovirus<br>Hu/GII.17/JB031520026/CHN/2015 | China | Hubei | 2015 | GII.17 |
| KT716735.1 | Norovirus<br>Hu/GII.17/JB031421150/CHN/2014 | China | Hubei | 2014 | GII.17 |
| KT716734.1 | Norovirus<br>Hu/GII.17/JB031421102/CHN/2014 | China | Hubei | 2014 | GII.17 |
| KT716733.1 | Norovirus<br>Hu/GII.17/JB031421095/CHN/2014 | China | Hubei | 2014 | GII.17 |
| KT716732.1 | Norovirus<br>Hu/GII.17/JB031421094/CHN/2014 | China | Hubei | 2014 | GII.17 |
| KT716731.1 | Norovirus<br>Hu/GII.17/JB031421092/CHN/2014 | China | Hubei | 2014 | GII.17 |
| KT716730.1 | Norovirus<br>Hu/GII.17/JB031421004/CHN/2014 | China | Hubei | 2014 | GII.17 |
| KT716729.1 | Norovirus<br>Hu/GII.17/JB031421000/CHN/2014 | China | Hubei | 2014 | GII.17 |
| KT716728.1 | Norovirus<br>Hu/GII.17/JB031420995/CHN/2014 | China | Hubei | 2014 | GII.17 |
| KT716727.1 | Norovirus<br>Hu/GII.17/JB031420994/CHN/2014 | China | Hubei | 2014 | GII.17 |
| KT716726.1 | Norovirus<br>Hu/GII.17/JB031420990/CHN/2014 | China | Hubei | 2014 | GII.17 |
| KT716725.1 | Norovirus<br>Hu/GII.17/JB031420921/CHN/2014 | China | Hubei | 2014 | GII.17 |
| KT716724.1 | Norovirus<br>Hu/GII.17/JB031420383/CHN/2014 | China | Hubei | 2014 | GII.17 |
| KT716723.1 | Norovirus<br>Hu/GII.17/JB031530044/CHN/2015 | China | Hubei | 2015 | GII.17 |
| KT716722.1 | Norovirus<br>Hu/GII.17/JB031530043/CHN/2015 | China | Hubei | 2015 | GII.17 |
| KT716721.1 | Norovirus<br>Hu/GII.17/JB031530042/CHN/2015 | China | Hubei | 2015 | GII.17 |
| KT716720.1 | Norovirus<br>Hu/GII.17/JB031530041/CHN/2015 | China | Hubei | 2015 | GII.17 |
| KT716719.1 | Norovirus<br>Hu/GII.17/JB031530039/CHN/2015 | China | Hubei | 2015 | GII.17 |
| KT716718.1 | Norovirus<br>Hu/GII.17/JB031530037/CHN/2015 | China | Hubei | 2015 | GII.17 |
| KT716717.1 | Norovirus<br>Hu/GII.17/JB031530026/CHN/2015 | China | Hubei | 2015 | GII.17 |
| KT716716.1 | Norovirus<br>Hu/GII.17/JB031530021/CHN/2015 | China | Hubei | 2015 | GII.17 |
| KT716715.1 | Norovirus<br>Hu/GII.17/JB031530020/CHN/2015 | China | Hubei | 2015 | GII.17 |

Table S1. Cont.

|            |                                                        |       |          |      |        |
|------------|--------------------------------------------------------|-------|----------|------|--------|
| KT716714.1 | Norovirus<br>Hu/GII.17/JB031530017/CHN/2015            | China | Hubei    | 2015 | GII.17 |
| KT716713.1 | Norovirus<br>Hu/GII.17/JB031530025/CHN/2014            | China | Hubei    | 2014 | GII.17 |
| KT716712.1 | Norovirus<br>Hu/GII.17/JB031530024/CHN/2014            | China | Hubei    | 2014 | GII.17 |
| KT716711.1 | Norovirus<br>Hu/GII.17/JB031530023/CHN/2014            | China | Hubei    | 2014 | GII.17 |
| KT716710.1 | Norovirus<br>Hu/GII.17/JB031430111/CHN/2014            | China | Hubei    | 2014 | GII.17 |
| KT716709.1 | Norovirus<br>Hu/GII.17/JB031430110/CHN/2014            | China | Hubei    | 2014 | GII.17 |
| KT716708.1 | Norovirus<br>Hu/GII.17/JB031430109/CHN/2014            | China | Hubei    | 2014 | GII.17 |
| KT716707.1 | Norovirus<br>Hu/GII.17/JB031430098/CHN/2014            | China | Hubei    | 2014 | GII.17 |
| KT716706.1 | Norovirus<br>Hu/GII.17/JB031430006/CHN/2014            | China | Hubei    | 2014 | GII.17 |
| KT716705.1 | Norovirus<br>Hu/GII.17/JB031430005/CHN/2014            | China | Hubei    | 2014 | GII.17 |
| KT716704.1 | Norovirus<br>Hu/GII.17/JB031430004/CHN/2014            | China | Hubei    | 2014 | GII.17 |
| GQ379155.1 | Norovirus<br>Hu/GII/Tianjin/510/2009/CHN               | China | Tianjin  | 2009 | GII.3  |
| KP325656.1 | Norovirus Hu/GI.2/SH20140420-<br>G29/Shanghai/2014/CHN | China | Shanghai | 2014 | GI.2   |
| KP325655.1 | Norovirus Hu/GI.5/SH20140415-<br>G25/Shanghai/2014/CHN | China | Shanghai | 2014 | GI.5   |
| KP325654.1 | Norovirus Hu/GI.2/SH20140414-<br>G24/Shanghai/2014/CHN | China | Shanghai | 2014 | GI.2   |
| KP325653.1 | Norovirus Hu/GI.2/SH20140420-<br>G23/Shanghai/2014/CHN | China | Shanghai | 2014 | GI.2   |
| KP325652.1 | Norovirus Hu/GI.2/SH20140415-<br>G21/Shanghai/2014/CHN | China | Shanghai | 2014 | GI.2   |
| KP325651.1 | Norovirus Hu/GI.5/SH20140415-<br>G20/Shanghai/2014/CHN | China | Shanghai | 2014 | GI.5   |
| KP325650.1 | Norovirus Hu/GI.5/SH20140414-<br>G19/Shanghai/2014/CHN | China | Shanghai | 2014 | GI.5   |
| KP325649.1 | Norovirus Hu/GI.2/SH20140415-<br>G17/Shanghai/2014/CHN | China | Shanghai | 2014 | GI.2   |
| KP325648.1 | Norovirus Hu/GI.2/SH20140414-<br>G14/Shanghai/2014/CHN | China | Shanghai | 2014 | GI.2   |
| KP325647.1 | Norovirus Hu/GI.5/SH20140414-<br>G13/Shanghai/2014/CHN | China | Shanghai | 2014 | GI.5   |
| KP325646.1 | Norovirus Hu/GI.2/SH20140414-<br>G11/Shanghai/2014/CHN | China | Shanghai | 2014 | GI.2   |

Table S1. Cont.

|            |                                                    |       |           |      |        |
|------------|----------------------------------------------------|-------|-----------|------|--------|
| KP325645.1 | Norovirus Hu/GI.5/SH20140415-G10/Shanghai/2014/CHN | China | Shanghai  | 2014 | GI.5   |
| KP325644.1 | Norovirus Hu/GI.2/SH20140415-G6/Shanghai/2014/CHN  | China | Shanghai  | 2014 | GI.2   |
| KP325643.1 | Norovirus Hu/GI.2/SH20140415-G5/Shanghai/2014/CHN  | China | Shanghai  | 2014 | GI.2   |
| KP325642.1 | Norovirus Hu/GI.2/SH20140414-G2/Shanghai/2014/CHN  | China | Shanghai  | 2014 | GI.2   |
| KP718702.1 | Norovirus GII.17 isolate Hu/15F95/ZQ/GD/CHN/2015   | China | Guangdong | 2015 | GII.17 |
| KP718701.1 | Norovirus GII.17 isolate Hu/15F93/ZH/GD/CHN/2015   | China | Guangdong | 2015 | GII.17 |
| KP718700.1 | Norovirus GII.17 isolate Hu/15F91/ZH/GD/CHN/2015   | China | Guangdong | 2015 | GII.17 |
| KP718699.1 | Norovirus GII.17 isolate Hu/15F89/ZH/GD/CHN/2015   | China | Guangdong | 2015 | GII.17 |
| KP718698.1 | Norovirus GII.17 isolate Hu/15F82/ZH/GD/CHN/2015   | China | Guangdong | 2015 | GII.17 |
| KP718697.1 | Norovirus GII.17 isolate Hu/15F81/ZH/GD/CHN/2015   | China | Guangdong | 2015 | GII.17 |
| KP718696.1 | Norovirus GII.17 isolate Hu/15F80/ZH/GD/CHN/2015   | China | Guangdong | 2015 | GII.17 |
| KP718695.1 | Norovirus GII.17 isolate Hu/15F79/ZH/GD/CHN/2015   | China | Guangdong | 2015 | GII.17 |
| KP718694.1 | Norovirus GII.17 isolate Hu/15F77/ZH/GD/CHN/2015   | China | Guangdong | 2015 | GII.17 |
| KP718693.1 | Norovirus GII.17 isolate Hu/15F74/ZH/GD/CHN/2015   | China | Guangdong | 2015 | GII.17 |
| KP718692.1 | Norovirus GII.17 isolate Hu/15F73/ZH/GD/CHN/2015   | China | Guangdong | 2015 | GII.17 |
| KP718691.1 | Norovirus GII.17 isolate Hu/15F72/ZH/GD/CHN/2015   | China | Guangdong | 2015 | GII.17 |
| KP718690.1 | Norovirus GII.17 isolate Hu/15F67/ZH/GD/CHN/2015   | China | Guangdong | 2015 | GII.17 |
| KP718689.1 | Norovirus GII.17 isolate Hu/15F62/ZH/GD/CHN/2015   | China | Guangdong | 2015 | GII.17 |
| KP718688.1 | Norovirus GII.17 isolate Hu/15F58/ZH/GD/CHN/2015   | China | Guangdong | 2015 | GII.17 |
| KP718687.1 | Norovirus GII.17 isolate Hu/15F57/ZH/GD/CHN/2015   | China | Guangdong | 2015 | GII.17 |
| KP718686.1 | Norovirus GII.17 isolate Hu/15F56/ZH/GD/CHN/2015   | China | Guangdong | 2015 | GII.17 |
| KP718685.1 | Norovirus GII.17 isolate Hu/15F55/ZH/GD/CHN/2015   | China | Guangdong | 2015 | GII.17 |
| KP718684.1 | Norovirus GII.17 isolate Hu/15F54/ZH/GD/CHN/2015   | China | Guangdong | 2015 | GII.17 |

Table S1. Cont.

|            |                                                                  |       |           |      |        |
|------------|------------------------------------------------------------------|-------|-----------|------|--------|
| KP718683.1 | Norovirus GII.17 isolate<br>Hu/15F48/ZH/GD/CHN/2015              | China | Guangdong | 2015 | GII.17 |
| KP718682.1 | Norovirus GII.17 isolate<br>Hu/15F42/ZH/GD/CHN/2015              | China | Guangdong | 2015 | GII.17 |
| KP718681.1 | Norovirus GII.17 isolate<br>Hu/15F33/ZH/GD/CHN/2015              | China | Guangdong | 2015 | GII.17 |
| KP718680.1 | Norovirus GII.17 isolate<br>Hu/15F32/ZH/GD/CHN/2015              | China | Guangdong | 2015 | GII.17 |
| KP718679.1 | Norovirus GII.17 isolate<br>Hu/15F23/HZ/GD/CHN/2015              | China | Guangdong | 2015 | GII.17 |
| KP718678.1 | Norovirus GII.17 isolate<br>Hu/15F22/HZ/GD/CHN/2015              | China | Guangdong | 2015 | GII.17 |
| KP718677.1 | Norovirus GII.17 isolate<br>Hu/15F19/HZ/GD/CHN/2015              | China | Guangdong | 2015 | GII.17 |
| KP718676.1 | Norovirus GII.17 isolate<br>Hu/15F18/HZ/GD/CHN/2015              | China | Guangdong | 2015 | GII.17 |
| KP718675.1 | Norovirus GII.17 isolate<br>Hu/15F17/HZ/GD/CHN/2015              | China | Guangdong | 2015 | GII.17 |
| KP718674.1 | Norovirus GII.17 isolate<br>Hu/15F16/HY/GD/CHN/2015              | China | Guangdong | 2015 | GII.17 |
| KP718673.1 | Norovirus GII.17 isolate<br>Hu/15F15/HY/GD/CHN/2015              | China | Guangdong | 2015 | GII.17 |
| KP718672.1 | Norovirus GII.17 isolate<br>Hu/15F14/HY/GD/CHN/2015              | China | Guangdong | 2015 | GII.17 |
| KP718671.1 | Norovirus GII.17 isolate<br>Hu/15F13/HY/GD/CHN/2015              | China | Guangdong | 2015 | GII.17 |
| KP718670.1 | Norovirus GII.17 isolate<br>Hu/15F10/HY/GD/CHN/2015              | China | Guangdong | 2015 | GII.17 |
| KP994317.1 | Norovirus GII.17 isolate<br>Hu/NoV/GD15/2015/Guangdong/<br>China | China | Guangdong | 2015 | GII.17 |
| KT253245.1 | Norovirus<br>Hu/GII.17/CHN/2015/ZHITHC-12                        | China | Guangdong | 2015 | GII.17 |
| KT970371.1 | Norovirus GII isolate<br>Hu/Guangzhou/GZ2015-<br>L324/CHN/2015   | China | Guangdong | 2015 | GII.17 |
| KR869086.1 | Norovirus<br>Hu/Guangzhou/GZ2015-<br>L362/CHN/2015               | China | Guangdong | 2015 | GII.17 |
| KR869085.1 | Norovirus<br>Hu/Guangzhou/GZ2015-<br>L343/CHN/2015               | China | Guangdong | 2015 | GII.17 |
| KR869084.1 | Norovirus<br>Hu/Guangzhou/GZ2015-<br>L340/CHN/2015               | China | Guangdong | 2015 | GII.17 |

**Table S1.** *Cont.*

|            |                                       |       |           |      |        |
|------------|---------------------------------------|-------|-----------|------|--------|
|            | Norovirus                             |       |           |      |        |
| KR869083.1 | Hu/Guangzhou/GZ2015-<br>L339/CHN/2015 | China | Guangdong | 2015 | GII.17 |
|            | Norovirus                             |       |           |      |        |
| KR869082.1 | Hu/Guangzhou/GZ2015-<br>L337/CHN/2015 | China | Guangdong | 2015 | GII.17 |
|            | Norovirus                             |       |           |      |        |
| KR869081.1 | Hu/Guangzhou/GZ2015-<br>L336/CHN/2015 | China | Guangdong | 2015 | GII.17 |
|            | Norovirus                             |       |           |      |        |
| KR869079.1 | Hu/Guangzhou/GZ2015-<br>L325/CHN/2015 | China | Guangdong | 2015 | GII.17 |
|            | Norovirus                             |       |           |      |        |
| KR869078.1 | Hu/Guangzhou/GZ2015-<br>L324/CHN/2015 | China | Guangdong | 2015 | GII.17 |
|            | Norovirus                             |       |           |      |        |
| KR869080.1 | Hu/Guangzhou/GZ2015-<br>L335/CHN/2015 | China | Guangdong | 2015 | GII.17 |

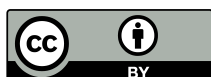

© 2016 by the authors; licensee MDPI, Basel, Switzerland. This article is an open access article distributed under the terms and conditions of the Creative Commons by Attribution (CC-BY) license (<http://creativecommons.org/licenses/by/4.0/>).
